# Supplementary material for: Unveiling the Human Nasopharyngeal Microbiome Compendium: Systematic Characterization of Community Architecture and Function Through a Comprehensive Meta-Analysis
Source: Research Square preprint supplement (doi:10.21203/rs.3.rs-7631112/v1), 2025-11-10
Supplement: Supplementary file 1 [file c163b73a52c8e31fbcf02b33.xlsx]

## Sheet: Summary
Table	Title
TableS1	Compiled list of primers identified in the meta-analysis used for data processing, with primer name, orientation, hypervariable region (HVR) target, and sequence specified.
TableS2	Maximum hypervariable region (HVR) amplicon lengths (bp) with and without primers included.
TableS3	Claude-identified and human-curated family taxonomy for SILVA 138
TableS4	NPCSTs Samples and Abundance Genera from Ulrb and corresponding NPCST-specific Prevalances.
TableS5	Performance metrics for Random Fores, SVM and Regression Models with mean (95%CI) for Accuracy, Precision, Recall and F1.
TableS6	Feature importance metrics for Random Forest classification.
TableS7	High and Low confidence Results from SVM and Random Forest. Determination
TableS8	Odds raiot Odds ratios with 95% confidence intervals comparing the likelihood of bacterial and viral infections versus controls
TableS9	SPEC-EASI assciation results.
TableS10	Comprehensive comparison of MetaCyc pathway differential abundance between gut microbiome clusters using MaAsLin3 and LinDA statistical frameworks.
TableS11	Pairwise functional differentiation between nasopharyngeal community state types.
TableS12	Cross-validation results across multiple validation stages
TableS13	NMHI Performance Evaluation: Statistical Comparisons Between Healthy Controls and Disease States

## Sheet: S1
Table S1. Compiled list of primers identified in the meta-analysis used for data processing, with primer name, orientation, hypervariable region (HVR) target, and sequence specified.
Name	Orientation	HVR target	Sequence
27F-A	Start	V1	AGAGTTYGATYMTGGCTYAG
27F-B	Start		AGARTTTGATCYTGGTTCAG
27F2	Start		AGAGTTTGATCMTGGCTCAG
338R	Stop	V2	TGCTGCCTCCCGTAGGAGT
338F	Start	V3	ACTCCTACGGGAGGCAGCAG
341F	Start		CCTACGGGNGGCWGCAG
533R	Stop		TTACCGCGGCTGCTGGC
534R	Stop		ATTACCGCGGCTGCTGG
515F	Start	V4	GTGCCAGCMGCCGCGG
805R	Stop		GGACTACHVGGGTWTCTAAT
806R	Stop		GACTACHVGGGTATCTAATCC
785F	Start	V5	GGATTAGATACCCBRGTAGTC
799F	Start		GTGCCAGCMGCCGCGGTAA
907R	Stop		CCGTCAATTCMTTTRAGTTT
1061R	Stop	V6	TCACGRCACGAGCTGACGAC
1100R	Stop		GGGTTGCGCTCGTTG
1115F	Start	V7	YAACGAGCGCAACCC
1175R	Stop		ACGTCRTCCCCDCCTTCCTC
1492R	Stop	V9	ACGGCTACCTTGTTACGACTT

## Sheet: S2
Table S2. Maximum hypervariable region (HVR) amplicon lengths (bp) with and without primers included.
HVR(s) targeted	Maximum expected length (bp)
	Primers included	Primers excluded
V1-V2	366	327
V1-V3	544	507
V3-V4	469	429
V4	292	256

## Sheet: S3
Table S3. Claude-identified and human-curated family taxonomy for SILVA 138
Family
f_009E01-B-SD-P15
f_211ds20
f_37-13
f_4572-13
f_67-14
f_A0839
f_A21b
f_A4b
f_AB-539-J10
f_AB1
f_Abditibacteriaceae
f_Acetobacteraceae
f_Acholeplasmataceae
f_Acidaminobacteraceae
f_Acidiferrobacteraceae
f_Acidimicrobiaceae
f_Acidithiobacillaceae
f_Acidobacteriaceae (Subgroup 1)
f_Acidothermaceae
f_Actinomarinaceae
f_AEGEAN-169 marine group
f_Aeromonadaceae
f_Aggregatilineaceae
f_AKAU3564 sediment group
f_AKAU3644
f_AKIW781
f_AKYG1722
f_AKYH767
f_Alcanivoracaceae
f_Alcanivoracaceae1
f_Alicyclobacillaceae
f_Alkalibacteraceae
f_Alteromonadaceae
f_Altiarchaeaceae
f_Amb-16S-1323
f_Aminicenantaceae
f_Amoebophilaceae
f_Anaerofustaceae
f_Anaerolineaceae
f_Anaeromyxobacteraceae
f_Anaerovoracaceae
f_Anaplasmataceae
f_Ancalomicrobiaceae
f_Aneurinibacillaceae
f_Aquaspirillaceae
f_Aquificaceae
f_Arcobacteraceae
f_Ardenticatenaceae
f_Arenicellaceae
f_Armatimonadaceae
f_Azospirillaceae
f_Azospirillales Incertae Sedis
f_B1-7BS
f_Babeliaceae
f_Bacillaceae
f_Bacteriovoracaceae
f_Bacteroidetes BD2-2
f_Bacteroidetes vadinHA17
f_Balneolaceae
f_BD2-7
f_Beggiatoaceae
f_Beijerinckiaceae
f_Bernardetiaceae
f_Beutenbergiaceae
f_BIrii41
f_Blastocatellaceae
f_Blattabacteriaceae
f_Bogoriellaceae
f_Bradymonadaceae
f_Brevibacillaceae
f_Brevibacteriaceae
f_Brevinemataceae
f_Brocadiaceae
f_Bryobacteraceae
f_BSV26
f_Budviciaceae
f_Burkholderiaceae
f_C2U
f_Caedibacteraceae
f_Caldalkalibacillaceae
f_Caldatribacteriaceae
f_Caldicellulosiraptoraceae
f_Caldicoprobacteraceae
f_Caldilineaceae
f_Calditrichaceae
f_Caloramatoraceae
f_Carboxydocellaceae
f_Catellicoccaceae
f_Catenulisporaceae
f_Caulobacteraceae
f_Celerinatantimonadaceae
f_Cellulomonadaceae
f_Cellvibrionaceae
f_Chitinibacteraceae
f_Chitinimonadaceae
f_Chitinophagaceae
f_Chloroflexaceae
f_Chromatiaceae
f_Chromobacteriaceae
f_Chroococcidiopsaceae
f_Chthoniobacteraceae
f_Chthonomonadaceae
f_Clade I
f_Clade III
f_Clade IV
f_Cloacimonadaceae
f_Clostridiisalibacteraceae
f_Coleofasciculaceae
f_Colwelliaceae
f_Comamonadaceae
f_Competibacteraceae
f_Coprothermobacteraceae
f_Coxiellaceae
f_CPla-3 termite group
f_CR-115
f_Criblamydiaceae
f_Crocinitomicaceae
f_Cryomorphaceae
f_Cryptosporangiaceae
f_cvE6
f_Cyanobacteriaceae
f_Cyanobacteriales Incertae Sedis
f_Cyanobiaceae
f_Cyclobacteriaceae
f_Cytophagaceae
f_D05-2
f_Deferribacteraceae
f_Defluviicoccaceae
f_Defluviitaleaceae
f_Deinococcaceae
f_Demequinaceae
f_Dermacoccaceae
f_Dermatophilaceae
f_Desulfatiglandaceae
f_Desulfitibacteraceae
f_Desulfitobacteriaceae
f_Desulfobaccaceae
f_Desulfobacteraceae
f_Desulfobulbaceae
f_Desulfocapsaceae
f_Desulfococcaceae
f_Desulfohalobiaceae
f_Desulfomicrobiaceae
f_Desulfomonilaceae
f_Desulfosarcinaceae
f_Desulfotomaculaceae
f_Desulfotomaculales Incertae Sedis
f_Desulfovibrionaceae
f_Desulfurisporaceae
f_Desulfurococcaceae
f_Desulfuromonadaceae
f_Dethiobacteraceae
f_DEV007
f_Devosiaceae
f_Dictyoglomeraceae
f_Dietziaceae
f_Dongiaceae
f_EC94
f_Ectothiorhodospiraceae
f_Elsteraceae
f_Elusimicrobiaceae
f_Endomicrobiaceae
f_Entotheonellaceae
f_env.OPS 17
f_Erwiniaceae
f_Ethanoligenenaceae
f_Eurycoccales Incertae Sedis
f_Euzebyaceae
f_Exiguobacteraceae
f_F082
f_Family III
f_Ferrovaceae
f_Ferrovibrionaceae
f_Fervidobacteriaceae
f_FFCH9454
f_Fibrobacteraceae
f_Fimbriimonadaceae
f_Flammeovirgaceae
f_Flavobacteriaceae
f_Fodinicurvataceae
f_Francisellaceae
f_Frankiaceae
f_Fusibacteraceae
f_Gaiellaceae
f_Gallionellaceae
f_Garciellaceae
f_Geitlerinemataceae
f_Geminicoccaceae
f_Gemmataceae
f_Gemmatimonadaceae
f_Geoalkalibacteraceae
f_Geobacteraceae
f_Geodermatophilaceae
f_Geothermobacteraceae
f_Gimesiaceae
f_gir-aah93h0
f_Glycomycetaceae
f_Gottschalkiaceae
f_Gracilibacteraceae
f_Gven-F17
f_GW2011
f_GWF2-44-16
f_GZKB124
f_Hadarchaeaceae
f_Hafniaceae
f_Hahellaceae
f_Halanaerobiaceae
f_Haliangiaceae
f_Halieaceae
f_Haloadaptaceae
f_Halobacteriaceae
f_Halobacteroidaceae
f_Halococcaceae
f_Haloferacaceae
f_Halomicrobiaceae
f_Halomonadaceae
f_Haloplasmataceae
f_Halorhodospiraceae
f_Halothiobacillaceae
f_HAW-RM37-2
f_Heliobacteriaceae
f_Herpetosiphonaceae
f_Holophagaceae
f_Holosporaceae
f_Hydrogenedensaceae
f_Hydrogenophilaceae
f_Hydrogenothermaceae
f_Hymenobacteraceae
f_Hyphomicrobiaceae
f_Hyphomicrobiales Incertae Sedis
f_Hyphomonadaceae
f_Iainarchaeaceae
f_Iamiaceae
f_Idiomarinaceae
f_Ignavibacteriaceae
f_Ilumatobacteraceae
f_Immundisolibacteraceae
f_Incertae Sedis
f_Inquilinaceae
f_Intrasporangiaceae
f_Isosphaeraceae
f_Izemoplasmataceae
f_JG30-KF-AS9
f_JG30-KF-CM45
f_JI49D030
f_Jonesiaceae
f_Kaistiaceae
f_Kallotenuaceae
f_Kangiellaceae
f_KD1-131
f_KD3-93
f_KF-JG30-B3
f_KI89A clade
f_Kiloniellaceae
f_Kineosporiaceae
f_Kiritimatiellaceae
f_Koribacteraceae
f_Ktedonobacteraceae
f_Kyrpidiaceae
f_Labraceae
f_Latescibacteraceae
f_Leeiaceae
f_Legionellaceae
f_Lentimicrobiaceae
f_Leptococcaceae
f_Leptolyngbyaceae
f_Leptospiraceae
f_Leptospirillaceae
f_Leucotrichaceae
f_Limnochordaceae
f_Limnotrichaceae
f_Listeriaceae
f_LiUU-11-161
f_Longimicrobiaceae
f_LWQ8
f_Lysobacteraceae
f_M2PB4-65 termite group
f_Magnetospiraceae
f_Magnetospirillaceae
f_Marinifilaceae
f_Marinilabiliaceae
f_Marinobacteraceae
f_Marinococcaceae
f_Marinomonadaceae
f_MB19
f_Melioribacteraceae
f_Methanobacteriaceae
f_Methanocellaceae
f_Methanocorpusculaceae
f_Methanomassiliicoccaceae
f_Methanomethylophilaceae
f_Methanomicrobiaceae
f_Methanosaetaceae
f_Methanosarcinaceae
f_Methanospirillaceae
f_Methylacidiphilaceae
f_Methylococcaceae
f_Methyloligellaceae
f_Methylomirabilaceae
f_Methylomonadaceae
f_Methylophagaceae
f_Methylophilaceae
f_Methylopilaceae
f_MgMjR-022
f_Micavibrionaceae
f_Micrarchaeaceae
f_Microbacteriaceae
f_Microbulbiferaceae
f_Micrococcales Incertae Sedis
f_Microcystaceae
f_Micromonosporaceae
f_Micropepsaceae
f_Microscillaceae
f_Microtrichaceae
f_Midichloriaceae
f_Mitochondria
f_Monoglobaceae
f_Moorellaceae
f_Moritellaceae
f_MWH-CFBk5
f_MWH-UniP1 aquatic group
f_Mycobacteriales Incertae Sedis
f_Myxococcaceae
f_Nakamurellaceae
f_Nannocystaceae
f_Nanosalinaceae
f_Natronincolaceae
f_Neomegalonemataceae
f_Nevskiaceae
f_Nisaeaceae
f_Nitriliruptoraceae
f_Nitrincolaceae
f_Nitrococcaceae
f_Nitrosococcaceae
f_Nitrosomonadaceae
f_Nitrosopumilaceae
f_Nitrososphaeraceae
f_Nitrosotaleaceae
f_Nitrospinaceae
f_Nitrospiraceae
f_Nocardiaceae
f_Nocardioidaceae
f_Nocardiopsidaceae
f_Nodosilineaceae
f_Nostocaceae
f_NS11-12 marine group
f_NS9 marine group
f_Obscuribacteraceae
f_Oceanospirillaceae
f_Oleiphilaceae
f_Oligoflexaceae
f_Oligosphaeraceae
f_OM182 clade
f_Omnitrophaceae
f_Opitutaceae
f_Orbaceae
f_Oscillatoriaceae
f_Oxalobacteraceae
f_Oxobacteraceae
f_p-251-o5
f_p-2534-18B5 gut group
f_P5D1-392
f_Paceibacteraceae
f_Paenibacillaceae
f_Paludibacteraceae
f_Paracaedibacteraceae
f_Parachlamydiaceae
f_Paracoccaceae
f_Parvibaculaceae
f_Parvularculaceae
f_PBS-18
f_Pectobacteriaceae
f_Pedosphaeraceae
f_PeH15
f_Pelotomaculaceae
f_Petrotogaceae
f_Phaselicystaceae
f_Phormidesmiaceae
f_Phormidiaceae
f_PHOS-HE36
f_Phycisphaeraceae
f_Pirellulaceae
f_Piscirickettsiaceae
f_Planococcaceae
f_Pleomorphomonadaceae
f_Polyangiaceae
f_Porticoccaceae
f_PRD18C08
f_Procabacteriaceae
f_Prolixibacteraceae
f_Promicromonosporaceae
f_Proteiniboraceae
f_Proteinivoracaceae
f_PS1 clade
f_Pseudanabaenaceae
f_Pseudoalteromonadaceae
f_Pseudobdellovibrionaceae
f_Pseudohongiellaceae
f_Pseudomonadaceae
f_Pseudonocardiaceae
f_Pseudopelobacteraceae
f_Psychromonadaceae
f_Puniceicoccaceae
f_Puniceispirillales Incertae Sedis
f_Pyrinomonadaceae
f_Raineyaceae
f_Reyranellaceae
f_Rhizobiaceae
f_Rhodanobacteraceae
f_Rhodobiaceae
f_Rhodocyclaceae
f_Rhodomicrobiaceae
f_Rhodospirillaceae
f_Rhodothermaceae
f_Rickettsiaceae
f_Rickettsiellaceae
f_Roseiflexaceae
f_Rs-M59 termite group
f_Ruaniaceae
f_Rubinisphaeraceae
f_Rubritaleaceae
f_Rubrobacteriaceae
f_Saccharimonadaceae
f_Saccharospirillaceae
f_Salinisphaeraceae
f_Salisediminibacteriaceae
f_Sandaracinaceae
f_Sanguibacteraceae
f_Saprospiraceae
f_SAR116 clade
f_SAR86 clade
f_SC-I-84
f_Scalinduaceae
f_Schleiferiaceae
f_Schlesneriaceae
f_Sedimentibacteraceae
f_Segniliparaceae
f_SHA-4
f_Shewanellaceae
f_Silvanigrellaceae
f_Simkaniaceae
f_SM1B06
f_SM23-30
f_SM2D12
f_Smithellaceae
f_Sneathiellaceae
f_Solibacteraceae
f_Solirubrobacteraceae
f_Sphingobacteriaceae
f_Sphingomonadaceae
f_Spirosomataceae
f_Spongiibacteraceae
f_Sporichthyaceae
f_Sporolactobacillaceae
f_Sporomusaceae
f_SRB2
f_ST-12K33
f_Stappiaceae
f_Steroidobacteraceae
f_Streptomycetaceae
f_Streptosporangiaceae
f_Streptosporangiales Incertae Sedis
f_Succinivibrionaceae
f_Sulfobacillaceae
f_Sulfolobaceae
f_Sulfuricellaceae
f_Sulfurimonadaceae
f_Sulfurospirillaceae
f_Sumerlaeaceae
f_Sva1033
f_Symbiobacteraceae
f_Synergistaceae
f_Syntrophaceae
f_Syntrophobacteraceae
f_Syntrophomonadaceae
f_Syntrophorhabdaceae
f_Tenderiaceae
f_Tepidanaerobacteraceae
f_Tepidisphaeraceae
f_Terasakiellaceae
f_Terrimicrobiaceae
f_Thermaceae
f_Thermacetogeniaceae
f_Thermaerobacteraceae
f_Thermicanaceae
f_Thermincolaceae
f_Thermoactinomycetaceae
f_Thermoanaerobacteraceae
f_Thermoanaerobaculaceae
f_Thermodesulfobacteriaceae
f_Thermodesulfovibrionaceae
f_Thermoleophilaceae
f_Thermomicrobiaceae
f_Thermomonosporaceae
f_Thermoproteaceae
f_Thermosediminibacteraceae
f_Thermosynechococcaceae
f_Thermotaleaceae
f_Thioalkalibacteraceae
f_Thioglobaceae
f_Thiohalorhabdaceae
f_Thiomicrospiraceae
f_Tindalliaceae
f_TRA3-20
f_Trueperaceae
f_Tsukamurellaceae
f_UCG-010
f_UCG-011
f_Unknown Family
f_URHD0088
f_vadinBE97
f_vadinHA21
f_Vampirovibrionaceae
f_Vermiphilaceae
f_Vibrionaceae
f_Vicinamibacteraceae
f_Victivallaceae
f_Vulgatibacteraceae
f_W27
f_Waddliaceae
f_WD2101 soil group
f_Williamwhitmaniaceae
f_Woeseiaceae
f_Wohlfahrtiimonadaceae
f_WWH38
f_WX65
f_Xanthobacteraceae
f_Xenococcaceae
f_Xiphinematobacteraceae
f_Yersiniaceae
f_YM_S32_TM7_50_20
f_Zavarziniaceae

## Sheet: S4
Table S4. NPCSTs Samples and Abundance Genera from Ulrb and corresponding NPCST-specific Prevalances. Genera with more than 80% prevalence are in bold font.
NPCSTs	I	II	III	IV	V	VI
Number of Samples	2057	1984	993	371	961	1424
Percentage of Total Samples	0.2641	0.2547	0.1275	0.0476	0.1234	0.1828
Abundant Genera Prevalance acorss NPCSTs [%]
g_Moraxella	98.9305	63.7601	48.5398	86.5229	54.9428	45.6461
g_Corynebacterium	96.9859	99.8992	95.3676		94.589	77.7388
g_Dolosigranulum	89.0617	85.5847	48.0363		50.052	39.0449
g_Streptococcus	97.2776	94.4556	89.3253		93.1322	99.2275
g_Haemophilus	80.8459	65.9778	55.7905	100	70.4475	82.4438
g_Peptoniphilus	28.0506	53.3266			70.8637	28.8624
g_Staphylococcus	86.5338	96.623	100		95.3174	73.8764
g_Lawsonella	26.2518	48.4879	42.0947		68.9906	28.3006
g_Finegoldia	26.3004	51.0585	38.4693		66.3892	25.7725
f_Neisseriaceae	50.0729	55.494	41.994		60.0416	44.382
g_Neisseria	60.0389		42.4975		62.0187	72.5421
g_Gemella	65.2406					80.1264
g_Porphyromonas	49.8785				58.3767	70.9972
g_Hoylesella	36.7039				56.1915	63.4831
g_Acinetobacter	49.7326		61.7321		83.975	51.7556
g_Prevotella	50.3646	52.9738			67.6379	80.4775
g_Fusobacterium	42.9752		36.858		57.232	72.4719
g_Anaerococcus		61.6935	51.4602		77.3153	34.6208
g_Cutibacterium		50.9073	46.2236		75.4422	27.7388
g_Escherichia-Shigella		28.1754			51.1967	34.7612
g_Rothia		57.0565	57.3011		66.9095	79.8455
g_Veillonella		66.1794	60.1208		73.7773	85.2528
f_Enterobacteriaceae		33.6694			55.7752
g_Lactobacillus			28.1974		36.8366	26.8961
g_Enhydrobacter					66.8054	34.691
g_Campylobacter					51.6129	64.7472
g_Bacteroides					33.5068
g_Kocuria					37.7732
g_Dialister					31.4256
g_Micrococcus					60.5619
g_Segatella					42.6639	60.6742
g_Actinomyces					54.6306	60.8146
f_Prevotellaceae					55.8793	70.9972
g_Chryseobacterium					48.0749
f_Lachnospiraceae					34.3392
g_Leptotrichia					36.5245	52.9494
g_Schaalia						66.2219
g_Megasphaera						37.0787
g_Granulicatella						60.2528
f_Pasteurellaceae						34.5506
g_Alloprevotella						31.882
f_Leptotrichiaceae						32.2331
g_Lancefieldella						45.0843
g_Selenomonas						40.7303
g_Parvimonas						32.0927
g_Treponema						31.3202
g_Catonella						33.9185
g_Tannerella						27.6685

## Sheet: S5
Table S5. Performance metrics for Random Forest, SVM and Regression Models with mean (95%CI) for Accuracy, Precision, Recall and F1. Results are presented for training and testing sets across overall performance and individual NPCSTs (I-VI), with all values reported to three decimal places. LASSO was removed from reporting because many of iteration have convergence issues that invalidate the appo…
Method	Training/Testing Set	NPCST Classifications	Mean and 95% Confidence Interval
			Accuracy	Precision	Recall	F1
Random Forest	Training	Overall	1.000 (1.000 - 1.000)	1.000 (1.000 - 1.000)	1.000 (1.000 - 1.000)	1.000 (1.000 - 1.000)
Random Forest	Training	I	1.000 (1.000 - 1.000)	1.000 (1.000 - 1.000)	1.000 (1.000 - 1.000)	1.000 (1.000 - 1.000)
Random Forest	Training	II	1.000 (1.000 - 1.000)	1.000 (1.000 - 1.000)	1.000 (1.000 - 1.000)	1.000 (1.000 - 1.000)
Random Forest	Training	III	1.000 (1.000 - 1.000)	1.000 (1.000 - 1.000)	1.000 (1.000 - 1.000)	1.000 (1.000 - 1.000)
Random Forest	Training	IV	1.000 (1.000 - 1.000)	1.000 (1.000 - 1.000)	1.000 (1.000 - 1.000)	1.000 (1.000 - 1.000)
Random Forest	Training	V	1.000 (1.000 - 1.000)	1.000 (1.000 - 1.000)	1.000 (1.000 - 1.000)	1.000 (1.000 - 1.000)
Random Forest	Training	VI	1.000 (1.000 - 1.000)	1.000 (1.000 - 1.000)	1.000 (1.000 - 1.000)	1.000 (1.000 - 1.000)
Random Forest	Testing	Overall	0.966 (0.965 - 0.966)	0.945 (0.945 - 0.946)	0.942 (0.942 - 0.943)	0.944 (0.943 - 0.944)
Random Forest	Testing	I	0.976 (0.975 - 0.976)	0.972 (0.971 - 0.972)	0.961 (0.960 - 0.962)	0.966 (0.966 - 0.967)
Random Forest	Testing	II	0.973 (0.973 - 0.973)	0.953 (0.952 - 0.954)	0.962 (0.961 - 0.963)	0.957 (0.957 - 0.958)
Random Forest	Testing	III	0.972 (0.972 - 0.973)	0.960 (0.959 - 0.961)	0.950 (0.949 - 0.952)	0.955 (0.954 - 0.956)
Random Forest	Testing	IV	0.982 (0.981 - 0.983)	0.986 (0.984 - 0.987)	0.965 (0.963 - 0.967)	0.975 (0.974 - 0.976)
Random Forest	Testing	V	0.922 (0.921 - 0.923)	0.865 (0.863 - 0.867)	0.862 (0.860 - 0.864)	0.863 (0.862 - 0.865)
Random Forest	Testing	VI	0.969 (0.969 - 0.970)	0.938 (0.936 - 0.939)	0.953 (0.952 - 0.954)	0.945 (0.944 - 0.946)
svm	Training	Overall	0.990 (0.990 - 0.990)	0.983 (0.983 - 0.983)	0.984 (0.983 - 0.984)	0.983 (0.983 - 0.983)
svm	Training	I	0.990 (0.990 - 0.991)	0.986 (0.986 - 0.986)	0.986 (0.986 - 0.986)	0.986 (0.986 - 0.986)
svm	Training	II	0.986 (0.986 - 0.986)	0.978 (0.978 - 0.978)	0.980 (0.980 - 0.980)	0.979 (0.979 - 0.979)
svm	Training	III	0.991 (0.991 - 0.991)	0.986 (0.986 - 0.986)	0.984 (0.984 - 0.984)	0.985 (0.985 - 0.985)
svm	Training	IV	0.998 (0.998 - 0.998)	0.990 (0.989 - 0.990)	0.997 (0.997 - 0.997)	0.993 (0.993 - 0.994)
svm	Training	V	0.979 (0.979 - 0.980)	0.963 (0.962 - 0.963)	0.964 (0.964 - 0.964)	0.963 (0.963 - 0.964)
svm	Training	VI	0.995 (0.994 - 0.995)	0.995 (0.995 - 0.995)	0.990 (0.990 - 0.990)	0.992 (0.992 - 0.993)
svm	Testing	Overall	0.972 (0.972 - 0.973)	0.954 (0.953 - 0.954)	0.954 (0.953 - 0.954)	0.954 (0.953 - 0.954)
svm	Testing	I	0.978 (0.978 - 0.978)	0.972 (0.971 - 0.973)	0.966 (0.965 - 0.967)	0.969 (0.969 - 0.969)
svm	Testing	II	0.973 (0.973 - 0.974)	0.957 (0.956 - 0.957)	0.962 (0.961 - 0.962)	0.959 (0.958 - 0.960)
svm	Testing	III	0.977 (0.976 - 0.978)	0.957 (0.956 - 0.959)	0.960 (0.959 - 0.961)	0.959 (0.958 - 0.959)
svm	Testing	IV	0.993 (0.992 - 0.993)	0.979 (0.978 - 0.981)	0.986 (0.985 - 0.988)	0.983 (0.982 - 0.984)
svm	Testing	V	0.936 (0.935 - 0.937)	0.900 (0.898 - 0.902)	0.886 (0.884 - 0.888)	0.893 (0.891 - 0.894)
svm	Testing	VI	0.977 (0.976 - 0.977)	0.956 (0.955 - 0.958)	0.964 (0.963 - 0.965)	0.960 (0.959 - 0.961)
Ridge	Training	Overall	0.948 (0.948 - 0.948)	0.933 (0.933 - 0.934)	0.912 (0.911 - 0.913)	0.922 (0.921 - 0.922)
Ridge	Training	I	0.950 (0.949 - 0.950)	0.935 (0.934 - 0.935)	0.922 (0.922 - 0.923)	0.929 (0.928 - 0.929)
Ridge	Training	II	0.959 (0.958 - 0.959)	0.892 (0.891 - 0.892)	0.957 (0.957 - 0.957)	0.923 (0.923 - 0.923)
Ridge	Training	III	0.950 (0.950 - 0.951)	0.966 (0.966 - 0.967)	0.905 (0.904 - 0.906)	0.935 (0.934 - 0.935)
Ridge	Training	IV	0.942 (0.942 - 0.943)	0.981 (0.981 - 0.982)	0.885 (0.884 - 0.887)	0.931 (0.930 - 0.931)
Ridge	Training	V	0.918 (0.918 - 0.919)	0.891 (0.890 - 0.891)	0.852 (0.851 - 0.852)	0.871 (0.870 - 0.871)
Ridge	Training	VI	0.968 (0.968 - 0.968)	0.935 (0.935 - 0.936)	0.951 (0.951 - 0.951)	0.943 (0.943 - 0.943)
Ridge	Testing	Overall	0.922 (0.921 - 0.922)	0.889 (0.889 - 0.890)	0.868 (0.867 - 0.869)	0.877 (0.877 - 0.878)
Ridge	Testing	I	0.938 (0.938 - 0.939)	0.922 (0.921 - 0.923)	0.904 (0.903 - 0.905)	0.913 (0.912 - 0.914)
Ridge	Testing	II	0.939 (0.939 - 0.940)	0.864 (0.863 - 0.866)	0.929 (0.928 - 0.930)	0.895 (0.894 - 0.896)
Ridge	Testing	III	0.917 (0.916 - 0.918)	0.921 (0.919 - 0.923)	0.844 (0.842 - 0.846)	0.881 (0.879 - 0.882)
Ridge	Testing	IV	0.936 (0.934 - 0.938)	0.973 (0.972 - 0.975)	0.873 (0.869 - 0.877)	0.920 (0.918 - 0.922)
Ridge	Testing	V	0.860 (0.858 - 0.861)	0.766 (0.763 - 0.768)	0.752 (0.749 - 0.754)	0.758 (0.756 - 0.760)
Ridge	Testing	VI	0.941 (0.941 - 0.942)	0.889 (0.887 - 0.890)	0.908 (0.907 - 0.909)	0.898 (0.897 - 0.899)
Elastic Net	Training	Overall	0.940 (0.933 - 0.947)	0.903 (0.892 - 0.914)	0.900 (0.889 - 0.912)	0.904 (0.894 - 0.914)
Elastic Net	Training	I	0.940 (0.933 - 0.947)	0.952 (0.952 - 0.952)	0.896 (0.882 - 0.910)	0.935 (0.934 - 0.935)
Elastic Net	Training	II	0.940 (0.932 - 0.947)	0.906 (0.905 - 0.907)	0.911 (0.897 - 0.926)	0.920 (0.919 - 0.920)
Elastic Net	Training	III	0.946 (0.939 - 0.953)	0.928 (0.927 - 0.928)	0.903 (0.888 - 0.917)	0.926 (0.926 - 0.927)
Elastic Net	Training	IV	0.958 (0.951 - 0.965)	0.950 (0.942 - 0.957)	0.921 (0.907 - 0.935)	0.945 (0.941 - 0.950)
Elastic Net	Training	V	0.902 (0.896 - 0.908)	0.852 (0.851 - 0.854)	0.824 (0.811 - 0.837)	0.845 (0.841 - 0.849)
Elastic Net	Training	VI	0.954 (0.947 - 0.962)	0.912 (0.901 - 0.923)	0.946 (0.941 - 0.951)	0.924 (0.915 - 0.933)
Elastic Net	Testing	Overall	0.936 (0.929 - 0.943)	0.896 (0.884 - 0.907)	0.893 (0.882 - 0.905)	0.896 (0.886 - 0.906)
Elastic Net	Testing	I	0.939 (0.932 - 0.946)	0.947 (0.941 - 0.952)	0.894 (0.880 - 0.909)	0.933 (0.932 - 0.933)
Elastic Net	Testing	II	0.937 (0.930 - 0.944)	0.903 (0.901 - 0.904)	0.907 (0.892 - 0.921)	0.916 (0.915 - 0.917)
Elastic Net	Testing	III	0.943 (0.936 - 0.950)	0.924 (0.922 - 0.926)	0.896 (0.882 - 0.911)	0.921 (0.919 - 0.922)
Elastic Net	Testing	IV	0.957 (0.950 - 0.965)	0.950 (0.945 - 0.956)	0.919 (0.905 - 0.933)	0.943 (0.938 - 0.948)
Elastic Net	Testing	V	0.891 (0.885 - 0.898)	0.827 (0.824 - 0.831)	0.807 (0.794 - 0.819)	0.824 (0.819 - 0.828)
Elastic Net	Testing	VI	0.949 (0.941 - 0.956)	0.904 (0.893 - 0.916)	0.936 (0.931 - 0.942)	0.915 (0.906 - 0.925)

## Sheet: S6
Table S6. Feature importance metrics for Random Forest classification. Mean Decrease Accuracy represents the average reduction in model accuracy when each feature is randomly permuted, while Mean Decrease Gini indicates the average reduction in node impurity when features are used for splitting, with higher values indicating greater feature importance. The NPCST class-specific Mean Accuracy (SD A…
Feature	Mean Decrease Accuracy	SD Decrease Accuracy	Mean Decrease Gini	SD Decrease Gini	NPCST Class-Specific Mean Accuracy (SD Accuracy)
					I	II	III	IV	V	VI
g_Staphylococcus	121.684	16.9085	810.381	15.189	57.746 (11.054)	39.920 (6.034)	260.187 (36.968)	14.038 (2.174)	21.240 (2.839)	27.494 (3.561)
g_Moraxella	110.29	15.5312	1198.42	17.8748	108.430 (18.381)	31.905 (4.329)	5.552 (1.230)	15.409 (2.519)	68.341 (9.492)	54.756 (8.123)
g_Haemophilus	79.5577	10.9219	382.811	10.0726	18.749 (2.623)	32.469 (5.226)	7.782 (1.182)	167.119 (33.645)	31.344 (4.470)	21.649 (3.066)
g_Corynebacterium	74.8501	10.2145	759.869	18.9945	13.737 (2.139)	81.391 (11.642)	9.553 (1.370)	19.124 (3.194)	34.348 (4.857)	30.383 (4.103)
g_Streptococcus	63.5361	8.72447	426.502	14.3744	19.367 (3.158)	22.813 (3.446)	17.342 (2.746)	7.933 (1.550)	34.591 (4.986)	56.071 (7.865)
g_Dolosigranulum	63.3791	8.64133	423.546	12.3201	16.460 (2.268)	63.979 (9.430)	5.369 (0.982)	10.259 (1.573)	38.182 (5.409)	34.516 (4.900)
g_Neisseria	19.5082	2.95376	46.8564	3.68515	-0.268 (1.091)	5.641 (1.552)	9.492 (1.915)	3.168 (0.855)	10.265 (1.799)	15.993 (2.321)
g_Fusobacterium	11.3221	1.8474	37.3176	4.27493	1.927 (0.996)	4.649 (0.951)	3.887 (1.073)	2.314 (0.913)	2.315 (1.147)	10.875 (1.670)
g_Escherichia-Shigella	9.37811	1.6047	16.7945	2.12928	2.971 (0.862)	4.897 (1.630)	4.021 (1.348)	1.151 (0.797)	5.497 (1.115)	4.798 (1.159)
g_Veillonella	8.8426	1.25027	87.217	11.6958	3.778 (0.719)	4.842 (0.770)	3.974 (0.851)	4.752 (0.829)	5.319 (1.162)	8.009 (1.214)
g_Anaerococcus	8.80834	1.28853	49.0271	6.79168	4.393 (0.943)	3.158 (0.950)	-0.243 (1.070)	3.007 (0.589)	7.714 (1.162)	6.373 (0.996)
f_Enterobacteriaceae	8.79948	1.51279	21.25	2.78072	3.094 (0.883)	1.287 (0.968)	5.689 (1.729)	2.180 (0.636)	6.560 (1.367)	4.272 (0.983)
g_Prevotella	8.38975	1.22794	58.8671	8.4182	2.778 (0.726)	5.241 (0.904)	2.899 (0.650)	3.544 (0.704)	2.921 (1.123)	7.260 (1.102)
g_Cutibacterium	8.18249	1.24392	37.9809	5.69782	2.820 (0.813)	2.915 (0.930)	1.034 (1.151)	2.677 (0.641)	6.077 (1.151)	6.431 (1.092)
f_Neisseriaceae	8.16366	1.61125	15.5771	1.64005	1.414 (1.061)	1.964 (1.112)	0.478 (1.054)	0.996 (0.949)	6.345 (1.540)	5.828 (1.296)
g_Peptoniphilus	7.59231	1.07013	35.6886	4.92229	3.566 (0.870)	1.873 (0.998)	-0.654 (1.098)	2.515 (0.582)	6.636 (1.011)	5.203 (0.812)
g_Acinetobacter	7.34661	1.23426	30.6	4.48919	2.997 (0.741)	3.696 (0.969)	2.173 (0.956)	2.480 (0.638)	6.058 (1.076)	3.429 (1.065)
g_Rothia	6.86578	1.13865	18.7982	3.02805	4.851 (1.046)	3.319 (0.781)	0.878 (1.021)	1.753 (0.676)	3.065 (1.131)	3.525 (0.826)
g_Gemella	6.68041	1.13718	25.3616	3.98144	3.131 (0.902)	3.487 (0.762)	2.416 (0.857)	2.511 (0.738)	3.286 (1.045)	4.514 (0.905)
g_Finegoldia	6.19984	1.08233	17.8054	2.88968	2.747 (0.731)	1.609 (0.969)	0.736 (1.098)	1.511 (0.620)	4.296 (0.801)	4.802 (0.913)
g_Campylobacter	6.1523	1.02066	22.0051	3.72251	2.214 (0.662)	2.662 (0.765)	3.631 (0.894)	1.872 (0.643)	2.857 (0.930)	4.888 (0.856)
g_Porphyromonas	5.56027	1.05481	13.0286	1.53209	2.203 (0.911)	2.829 (0.774)	1.681 (0.770)	1.325 (0.780)	1.678 (1.060)	3.822 (0.936)
f_Prevotellaceae	5.39542	1.0287	12.1063	1.81589	1.024 (0.950)	2.701 (0.871)	1.190 (0.860)	0.807 (0.972)	2.054 (0.983)	4.264 (0.909)
g_Schaalia	5.23193	1.12251	9.61795	1.99745	2.427 (0.773)	4.082 (1.028)	0.874 (0.885)	0.893 (0.850)	2.963 (1.049)	1.346 (0.895)
g_Granulicatella	4.8654	1.07897	8.34977	0.900714	3.153 (0.970)	2.047 (0.831)	2.386 (1.132)	0.790 (0.877)	1.288 (1.062)	1.286 (1.079)
g_Chryseobacterium	4.8011	1.20241	8.27793	1.28916	1.393 (0.935)	1.118 (0.957)	-0.225 (1.073)	0.762 (0.833)	3.465 (1.305)	3.361 (1.016)
g_Enterococcus	4.79407	1.49579	4.81628	1.01792	1.040 (0.718)	3.730 (1.442)	0.128 (1.047)	0.589 (0.654)	2.416 (1.629)	2.469 (0.934)
g_Parvimonas	4.77117	1.02278	6.82234	1.10904	0.723 (1.003)	3.135 (0.842)	1.960 (1.090)	0.285 (0.958)	0.115 (1.054)	3.503 (0.872)
g_Segatella	4.74796	0.803999	24.1138	5.39367	1.639 (0.600)	2.942 (0.670)	2.638 (1.043)	2.279 (0.593)	1.339 (1.040)	4.407 (0.737)
f_Pasteurellaceae	4.64953	1.171	7.87798	1.03021	-0.409 (1.048)	2.546 (0.806)	-0.054 (0.991)	0.346 (1.103)	3.291 (1.009)	2.916 (1.455)
g_Lawsonella	4.57382	0.834821	12.7598	2.11214	2.713 (0.728)	1.666 (0.962)	0.568 (1.047)	1.195 (0.717)	2.524 (0.943)	3.029 (0.721)
g_Actinomyces	4.38749	0.999406	6.48498	0.70313	1.339 (0.879)	2.989 (0.860)	0.503 (1.009)	1.807 (0.976)	1.543 (1.148)	1.588 (0.983)
g_Hoylesella	4.24436	1.07939	11.2768	1.26557	2.969 (1.133)	1.594 (0.961)	1.215 (0.860)	1.196 (0.754)	1.898 (1.118)	1.442 (1.015)
f_Moraxellaceae	4.03459	1.40309	5.45409	0.973838	1.952 (1.549)	2.671 (0.984)	0.230 (0.677)	0.111 (0.833)	2.921 (1.041)	0.522 (1.006)
g_Bacteroides	3.99043	0.86972	7.48884	1.58094	1.753 (0.823)	2.114 (0.916)	-0.346 (1.049)	1.283 (0.660)	3.172 (0.779)	0.638 (1.068)
g_Treponema	3.88042	0.984343	4.849	0.903915	0.408 (0.977)	2.385 (0.814)	1.121 (0.966)	0.171 (0.825)	0.966 (1.064)	2.983 (0.857)
g_Oribacterium	3.49779	0.640603	16.924	5.52926	1.549 (0.588)	2.582 (0.623)	1.574 (0.737)	2.121 (0.597)	1.580 (1.042)	2.927 (0.628)
g_Enhydrobacter	3.43811	0.880833	8.67791	1.19095	1.562 (0.917)	1.474 (0.919)	0.793 (1.031)	0.872 (0.877)	0.764 (1.054)	2.776 (0.742)
g_Micrococcus	3.0201	0.882777	6.34812	0.742089	1.083 (0.949)	0.966 (0.968)	0.739 (1.070)	1.129 (0.792)	0.231 (1.090)	2.579 (0.749)
g_Alloprevotella	3.00579	0.925389	3.4228	0.611469	0.394 (0.988)	2.429 (0.849)	0.640 (0.869)	0.341 (0.716)	0.630 (1.132)	1.505 (1.118)
g_Megasphaera	2.92589	0.826348	3.37203	1.05606	0.685 (0.920)	1.338 (0.678)	1.509 (0.791)	0.445 (0.677)	1.845 (1.180)	1.443 (0.808)
g_Lancefieldella	2.90971	0.857285	5.00245	1.52664	1.027 (0.729)	1.549 (0.774)	2.514 (1.200)	0.587 (0.719)	1.060 (1.039)	1.395 (0.821)
f_Lachnospiraceae	2.83211	0.813305	4.16169	1.06122	1.683 (0.859)	0.535 (0.999)	-0.009 (1.035)	0.758 (0.852)	2.449 (0.701)	0.269 (1.094)
g_Ruminococcus	2.74195	0.807121	1.86442	0.533274	1.558 (0.874)	1.562 (0.954)	0.067 (0.763)	0.250 (0.554)	1.288 (0.899)	1.134 (0.824)
g_Peptococcus	2.73972	0.964677	1.64181	0.357605	0.649 (1.023)	1.821 (0.794)	1.938 (1.062)	0.127 (0.574)	0.180 (1.040)	0.117 (1.050)
f_Leptotrichiaceae	2.7098	0.834	2.76529	0.489352	0.419 (1.060)	1.066 (0.904)	1.261 (0.803)	0.575 (0.856)	1.559 (0.915)	1.252 (0.980)
g_Selenomonas	2.67892	0.776549	3.01319	1.24624	0.641 (0.883)	1.493 (0.669)	1.912 (0.986)	0.397 (0.853)	0.818 (1.038)	1.265 (0.861)
g_Lachnoanaerobaculum	2.58223	0.766987	4.54962	1.26305	1.240 (0.817)	2.337 (0.666)	0.752 (0.934)	0.635 (0.804)	0.911 (0.961)	0.032 (1.065)
g_Abiotrophia	2.48902	1.05893	2.74596	0.421856	2.382 (1.011)	1.537 (0.925)	0.046 (0.951)	0.567 (0.782)	-0.429 (1.024)	0.158 (0.983)
g_Kocuria	2.46724	0.931022	3.97388	0.513564	0.239 (1.048)	1.855 (0.875)	0.277 (1.079)	0.587 (0.842)	0.051 (1.086)	1.961 (0.795)
g_Bergeyella	2.45652	1.00066	4.96983	0.649336	1.071 (0.928)	1.947 (0.827)	0.206 (0.997)	0.366 (0.949)	1.176 (0.990)	0.230 (1.041)
g_Morganella	2.44534	1.18596	1.76495	0.41276	-0.137 (0.781)	-0.389 (0.845)	2.302 (1.179)	0.073 (0.332)	-0.061 (1.010)	1.640 (0.869)
g_Streptobacillus	2.40087	1.05788	3.1159	0.561664	-1.209 (0.990)	0.628 (0.957)	2.111 (1.156)	0.204 (0.895)	1.372 (0.882)	1.767 (0.968)
g_Stomatobaculum	2.36166	0.713178	2.22103	0.96564	0.732 (0.830)	1.892 (0.691)	0.716 (0.877)	0.275 (0.607)	0.911 (0.990)	0.797 (0.978)
g_Negativicoccus	2.34867	0.952344	2.53722	0.434974	1.865 (0.744)	-0.055 (0.995)	1.661 (0.920)	0.138 (0.537)	-0.334 (1.160)	1.405 (0.669)
g_Johnsonella	2.31692	0.967865	3.18708	0.558159	0.344 (1.100)	1.537 (0.943)	0.153 (0.811)	-0.256 (1.014)	1.209 (0.965)	1.249 (1.026)
g_Leptotrichia	2.2939	0.785846	3.69714	0.619703	1.009 (0.840)	1.479 (0.875)	0.220 (1.022)	0.758 (0.826)	0.675 (1.035)	1.074 (0.896)
g_Faecalibacterium	2.26129	0.845901	2.25155	0.528628	0.993 (0.908)	1.057 (0.923)	0.051 (0.945)	0.569 (0.666)	1.276 (0.921)	1.035 (0.961)
f_Ruminococcaceae	2.25302	0.819859	2.71579	0.85277	0.955 (0.979)	0.430 (1.021)	0.078 (0.969)	0.772 (0.670)	1.618 (0.866)	1.053 (0.872)
g_Gemmiger	2.22949	0.835807	1.1957	0.39533	0.437 (0.871)	1.644 (0.834)	0.082 (0.552)	0.141 (0.421)	1.136 (0.914)	0.809 (0.895)
g_Catonella	2.15332	0.83856	2.53977	0.71766	0.313 (0.960)	1.204 (0.805)	0.511 (0.901)	0.099 (0.720)	1.618 (0.923)	0.774 (0.998)
g_Peptostreptococcus	2.14634	0.938748	2.30497	0.413628	1.431 (0.917)	1.996 (0.808)	0.363 (0.938)	0.113 (0.654)	0.158 (0.996)	-0.516 (1.067)
f_Selenomonadaceae	2.05556	1.11698	1.43438	0.291452	1.875 (1.043)	0.623 (0.959)	0.731 (1.012)	0.133 (0.389)	-0.069 (1.003)	-0.059 (1.013)
g_Centipeda	2.05066	0.994672	2.26759	0.39865	0.507 (0.948)	1.240 (0.919)	1.044 (1.021)	1.598 (0.976)	0.202 (1.020)	0.186 (1.068)
g_Actinobacillus	2.00614	0.981748	1.32507	0.292021	1.523 (0.926)	-0.003 (0.820)	0.873 (0.979)	0.027 (0.341)	0.923 (0.983)	-0.149 (0.989)
g_Klebsiella	1.98631	0.981912	1.91761	0.491722	0.527 (0.731)	0.532 (0.827)	1.514 (1.099)	0.097 (0.420)	0.653 (1.003)	0.875 (1.128)
g_Lactococcus	1.96581	1.13052	5.27879	0.712035	0.190 (1.052)	1.389 (0.956)	-0.320 (1.012)	0.043 (0.876)	0.819 (1.009)	1.353 (1.327)
g_Helcococcus	1.75105	1.28577	1.733	0.405316	-1.003 (1.013)	2.287 (1.276)	-0.164 (0.680)	0.275 (0.862)	-0.051 (1.003)	0.868 (0.910)
g_Subdoligranulum	1.64237	0.793767	0.412977	0.175666	1.465 (0.741)	0.446 (0.628)	0.039 (0.259)	0.008 (0.090)	0.135 (0.627)	0.254 (0.750)
g_Tannerella	1.6403	0.826608	1.52083	0.317949	0.468 (0.913)	1.746 (0.779)	0.310 (0.852)	0.118 (0.544)	-0.244 (0.982)	0.503 (0.967)
f_Weeksellaceae	1.6349	1.05486	1.4011	0.371006	0.192 (0.753)	0.369 (0.922)	0.035 (0.592)	0.048 (0.242)	0.589 (1.127)	1.628 (0.988)
g_Bulleidia	1.63263	0.933656	0.519315	0.173541	0.113 (0.444)	1.653 (0.812)	0.778 (0.780)	0.006 (0.078)	-0.238 (0.889)	-0.178 (0.902)
g_Holdemanella	1.60801	0.810216	0.537529	0.203962	-0.020 (0.447)	1.046 (0.828)	0.064 (0.373)	0.359 (0.525)	0.475 (0.928)	0.931 (0.849)
g_Alistipes	1.59209	0.947129	1.48023	0.414973	1.164 (0.877)	0.219 (1.009)	-0.092 (0.739)	0.112 (0.538)	0.737 (1.018)	0.930 (1.006)
g_Dermabacter	1.57765	1.17622	2.74863	0.622581	0.004 (0.966)	0.033 (1.053)	-1.419 (1.060)	0.100 (0.357)	2.139 (1.359)	1.329 (0.822)
g_Cardiobacterium	1.55422	1.00418	1.73009	0.363362	1.062 (0.880)	0.833 (0.974)	0.121 (0.826)	0.836 (0.777)	0.222 (1.016)	-0.039 (1.012)
g_Aerococcus	1.54761	0.929147	1.88719	0.37456	-0.052 (0.951)	0.498 (1.000)	0.239 (0.935)	0.564 (0.692)	0.012 (1.030)	1.604 (0.808)
g_Pseudoleptotrichia	1.47097	0.897787	2.52996	0.369786	0.842 (0.888)	0.843 (0.952)	0.148 (0.988)	0.387 (0.764)	0.849 (0.997)	0.106 (1.006)
g_Rikenellaceae RC9 gut group	1.45906	0.897796	0.828069	0.239782	0.115 (0.766)	1.636 (0.745)	0.012 (0.662)	-0.006 (0.340)	0.228 (1.003)	-0.166 (1.020)
g_Aggregatibacter	1.44397	0.90236	1.81478	0.295053	0.880 (0.927)	1.172 (0.915)	0.431 (0.984)	0.642 (0.663)	-0.414 (1.036)	0.103 (1.029)
g_Lactobacillus	1.43869	1.01525	4.20387	0.561464	0.866 (0.903)	1.711 (0.910)	0.110 (1.033)	0.349 (0.847)	-0.563 (1.033)	0.666 (1.033)
g_Coprococcus	1.42907	0.944358	1.01958	0.30769	0.569 (0.838)	0.553 (1.021)	-0.010 (0.463)	0.016 (0.141)	0.841 (0.954)	0.895 (0.867)
g_Microlunatus	1.40703	0.973283	0.974284	0.248081	1.076 (0.766)	1.601 (0.877)	0.082 (0.535)	0.018 (0.161)	-0.591 (0.978)	-0.005 (0.931)
f_Barnesiellaceae	1.40682	0.953227	0.361219	0.215626	-0.042 (0.202)	1.422 (0.955)	0.002 (0.045)	0.000 (0.000)	0.006 (0.119)	0.000 (0.000)
g_Eikenella	1.39913	0.957661	2.63815	0.418003	0.685 (0.991)	1.194 (0.887)	-0.050 (1.037)	0.195 (0.713)	0.406 (1.041)	0.373 (1.032)
g_Weissella	1.39764	1.14098	0.812087	0.201543	1.654 (1.033)	0.430 (0.979)	-0.259 (0.844)	0.070 (0.388)	-0.466 (0.886)	0.017 (0.875)
g_Solobacterium	1.38916	0.861456	1.98559	0.492801	0.040 (0.984)	1.224 (0.783)	0.648 (0.837)	0.300 (0.596)	0.557 (1.029)	0.157 (1.011)
g_Collinsella	1.36324	0.876155	1.07719	0.298617	0.244 (0.842)	0.908 (0.942)	0.002 (0.791)	0.058 (0.334)	0.615 (0.980)	0.713 (0.892)
g_Lachnospiraceae ND3007 group	1.35359	0.996791	0.332491	0.128237	1.128 (0.918)	0.465 (0.912)	0.035 (0.235)	0.189 (0.423)	-0.181 (0.577)	0.258 (0.794)
f_Staphylococcaceae	1.34687	1.0329	2.82029	0.45075	0.455 (0.941)	0.773 (1.067)	-1.103 (0.860)	0.215 (0.560)	-0.077 (1.041)	1.945 (0.837)
g_Agathobacter	1.30459	1.02559	0.979474	0.270651	1.338 (0.975)	0.560 (0.988)	-0.080 (0.704)	0.056 (0.252)	0.052 (1.056)	0.502 (0.922)
f_Actinomycetaceae	1.29456	1.04831	1.8001	0.312434	0.567 (0.978)	1.214 (0.997)	-0.152 (1.025)	0.912 (0.884)	-0.074 (1.016)	-0.273 (1.025)
g_Parasutterella	1.28853	0.943048	0.364885	0.162234	1.197 (0.841)	0.056 (0.240)	0.026 (0.223)	0.008 (0.090)	0.237 (0.689)	0.253 (0.834)
g_Phascolarctobacterium	1.2874	0.940863	0.883539	0.342987	0.258 (0.713)	0.401 (0.879)	0.126 (0.535)	0.070 (0.363)	0.963 (0.914)	0.612 (0.986)
g_Blautia	1.28287	1.01684	1.33581	0.28355	0.420 (0.909)	0.503 (1.016)	0.011 (0.921)	0.402 (0.586)	0.003 (1.067)	1.226 (0.874)
f_Christensenellaceae	1.27427	0.939672	0.210863	0.12248	1.351 (0.900)	-0.085 (0.408)	0.036 (0.198)	0.006 (0.078)	0.022 (0.466)	-0.076 (0.468)
f_Veillonellaceae	1.2693	1.28259	1.31506	0.293132	0.600 (0.924)	0.841 (0.959)	1.993 (1.036)	0.112 (0.506)	-0.898 (0.987)	-0.770 (0.973)
g_Faecalimonas	1.25937	1.12624	0.214613	0.141196	1.321 (1.092)	-0.056 (0.277)	0.013 (0.118)	0.010 (0.100)	-0.021 (0.250)	-0.041 (0.412)
g_Alkanindiges	1.23253	0.958293	1.03106	0.253151	0.344 (0.853)	1.558 (0.855)	-0.082 (0.624)	0.055 (0.291)	-0.213 (0.999)	0.101 (0.943)
f_Micrococcaceae	1.22745	1.04434	3.22445	0.411096	1.516 (0.940)	0.140 (1.008)	0.437 (1.041)	-0.011 (0.897)	-0.870 (1.049)	1.430 (0.785)
g_Lachnospiraceae FCS020 group	1.21762	0.996704	0.219654	0.119395	1.166 (0.963)	0.132 (0.628)	0.022 (0.161)	0.006 (0.078)	-0.049 (0.525)	0.047 (0.369)
f_[Eubacterium] coprostanoligenes group	1.17077	0.882799	0.86316	0.264719	0.440 (0.888)	0.258 (0.917)	0.050 (0.900)	0.075 (0.345)	0.594 (0.926)	0.745 (0.907)
g_Butyrivibrio	1.17065	0.786852	0.303882	0.122527	-0.038 (0.375)	0.962 (0.663)	-0.012 (0.338)	0.002 (0.045)	0.551 (0.923)	0.179 (0.915)
g_CAG-352	1.17001	0.968219	0.469539	0.208441	1.089 (0.970)	0.288 (0.738)	0.026 (0.177)	0.211 (0.439)	0.001 (0.398)	-0.117 (0.655)
g_Mycoplasma	1.14573	1.01968	1.7489	0.386258	0.324 (0.725)	0.450 (0.994)	0.099 (1.095)	0.042 (0.340)	0.347 (1.076)	0.950 (1.026)
g_Oscillibacter	1.11043	0.939694	0.268037	0.11759	0.924 (0.919)	0.596 (0.660)	-0.024 (0.453)	0.010 (0.100)	-0.088 (0.614)	0.087 (0.598)
f_Propionibacteriaceae	1.08348	1.00484	2.78503	0.39085	0.728 (0.979)	-0.835 (1.138)	-0.318 (1.030)	0.346 (0.683)	-0.442 (1.054)	1.986 (0.617)
f_Acidaminococcaceae	1.08084	0.893525	0.150835	0.103158	1.040 (0.887)	-0.003 (0.351)	0.008 (0.090)	0.002 (0.045)	0.040 (0.302)	0.071 (0.268)
g_CAG-196	1.07862	0.950138	0.299869	0.171858	0.645 (0.812)	0.813 (0.901)	0.006 (0.100)	0.000 (0.000)	0.013 (0.415)	0.225 (0.461)
g_Achromobacter	1.04787	1.07363	2.87329	0.423265	0.545 (0.992)	0.346 (1.045)	-0.712 (1.120)	1.055 (0.721)	-0.109 (1.018)	0.980 (0.998)
g_Bifidobacterium	1.01029	1.01067	2.41653	0.365249	0.897 (0.965)	0.713 (1.002)	-0.058 (0.977)	0.348 (0.686)	-0.439 (1.036)	0.725 (1.023)
g_Negativibacillus	0.984258	1.0027	0.228344	0.144809	0.004 (0.064)	1.044 (0.990)	0.002 (0.078)	0.000 (0.000)	-0.159 (0.388)	0.018 (0.134)
g_Marinilactibacillus	0.953841	0.997983	0.438039	0.15824	-0.032 (0.388)	0.325 (0.827)	-0.004 (0.246)	1.069 (0.891)	-0.335 (0.914)	0.382 (0.682)
g_UCG-005	0.945005	1.01475	0.914256	0.33698	0.193 (0.678)	0.589 (0.808)	-0.074 (0.620)	0.015 (0.342)	0.724 (1.018)	0.287 (1.000)
g_Filifactor	0.938311	0.966303	0.683642	0.20481	0.366 (0.712)	0.923 (0.806)	-0.033 (0.573)	0.008 (0.211)	0.011 (0.983)	0.201 (1.083)
g_Prevotellaceae UCG-001	0.932468	1.05194	0.54491	0.241454	-0.043 (0.457)	0.035 (0.575)	0.036 (0.375)	-0.004 (0.305)	0.252 (1.020)	1.058 (0.928)
f_Bifidobacteriaceae	0.927797	0.961434	0.594665	0.241382	0.147 (0.577)	0.384 (0.601)	0.009 (0.397)	0.044 (0.259)	0.515 (1.019)	0.502 (1.044)
g_Prevotellaceae UCG-003	0.920552	0.942546	0.454212	0.229094	0.038 (0.562)	0.331 (0.770)	0.059 (0.427)	0.020 (0.246)	0.490 (0.981)	0.631 (0.883)
f_Erysipelotrichaceae	0.91557	1.05446	0.344011	0.137092	0.028 (0.219)	0.873 (0.940)	0.890 (0.727)	0.000 (0.000)	-0.884 (0.732)	0.056 (0.469)
g_Akkermansia	0.910403	0.963682	0.820925	0.258195	0.394 (0.755)	0.675 (0.931)	-0.073 (0.649)	0.046 (0.306)	0.383 (1.004)	0.273 (0.938)
g_Barnesiella	0.890901	1.01775	0.395937	0.170778	0.279 (0.561)	0.640 (0.989)	0.008 (0.229)	0.173 (0.396)	0.246 (0.927)	0.120 (0.702)
g_Anaerobutyricum	0.876067	1.02306	0.447738	0.144213	0.063 (0.684)	1.034 (0.902)	-0.115 (0.968)	-0.028 (0.189)	0.041 (0.863)	0.104 (0.659)
g_Cloacibacterium	0.869975	1.0564	1.96557	0.371456	0.949 (0.899)	1.147 (0.915)	-0.135 (1.080)	0.016 (0.413)	-0.564 (0.977)	0.574 (0.950)
g_Trichococcus	0.810658	0.908164	0.258062	0.129122	0.658 (0.670)	0.065 (0.883)	-0.001 (0.168)	0.004 (0.064)	0.257 (0.605)	0.343 (0.554)
g_Parabacteroides	0.809658	0.957942	0.678174	0.226685	0.500 (0.856)	0.189 (0.851)	-0.429 (0.829)	-0.020 (0.291)	0.519 (0.944)	0.608 (0.879)
f_Lactobacillaceae	0.789877	1.03069	0.800385	0.205363	0.914 (0.836)	0.881 (0.830)	-0.280 (0.839)	0.026 (0.214)	-0.036 (0.956)	-0.445 (0.990)
g_Rodentibacter	0.789827	1.07843	0.763717	0.222934	0.927 (0.954)	0.617 (0.833)	0.122 (0.941)	0.004 (0.064)	-0.335 (0.925)	-0.227 (0.929)
g_Ezakiella	0.783937	0.956468	0.915498	0.198266	0.810 (0.856)	-0.104 (0.923)	-0.319 (0.857)	0.020 (0.262)	-0.794 (0.954)	1.282 (0.792)
g_Paeniglutamicibacter	0.774412	1.07085	0.540306	0.20034	0.624 (0.712)	0.820 (0.893)	0.062 (0.358)	0.008 (0.090)	-0.664 (0.883)	0.557 (0.913)
g_Romboutsia	0.764649	0.922671	0.638775	0.208497	0.326 (0.698)	0.080 (0.862)	-0.127 (0.719)	0.024 (0.200)	0.298 (0.986)	0.805 (0.932)
g_[Eubacterium] ruminantium group	0.756884	0.914175	0.258665	0.134308	0.012 (0.109)	0.805 (0.729)	0.040 (0.243)	0.000 (0.000)	0.078 (0.585)	0.046 (0.824)
g_Winkia	0.7544	1.37295	2.16809	0.581474	0.247 (0.697)	0.962 (1.211)	-0.081 (0.960)	0.000 (0.142)	0.164 (1.405)	0.075 (0.949)
g_Arthrobacter	0.739309	1.02649	0.398845	0.149901	0.569 (0.825)	0.225 (0.636)	0.021 (0.580)	0.008 (0.110)	-0.061 (0.909)	0.351 (0.848)
g_Dorea	0.721301	1.05073	0.518508	0.180397	0.188 (0.811)	1.051 (0.877)	-0.146 (0.939)	0.139 (0.374)	-0.331 (0.879)	0.030 (0.494)
g_Empedobacter	0.712212	0.985641	1.09932	0.234857	0.671 (0.965)	0.425 (1.016)	0.045 (0.724)	0.038 (0.316)	-0.563 (0.954)	0.412 (0.989)
g_Dialister	0.705276	1.06381	2.41264	0.385524	0.779 (1.033)	0.436 (1.055)	0.244 (1.004)	0.166 (0.639)	-0.433 (1.047)	0.347 (0.951)
g_Uruburuella	0.703347	0.749385	0.139	0.0966443	0.002 (0.045)	0.010 (0.100)	0.008 (0.090)	0.000 (0.000)	0.461 (0.697)	0.472 (0.626)
g_Leuconostoc	0.683538	1.06046	2.39694	0.364843	0.633 (0.957)	0.712 (0.979)	-0.121 (0.972)	-0.070 (0.782)	-0.602 (1.016)	0.763 (1.029)
g_Mycoplasmoides	0.679165	1.11299	0.927012	0.342055	0.056 (0.528)	1.015 (0.987)	0.034 (0.208)	-0.002 (0.185)	-0.366 (0.899)	0.181 (0.779)
g_Actinotignum	0.673615	1.05035	0.66497	0.18336	0.748 (0.771)	-0.223 (0.794)	0.197 (0.649)	0.018 (0.134)	-0.666 (1.006)	1.116 (0.794)
g_Ureaplasma	0.671262	1.02896	0.684977	0.19642	0.204 (0.613)	0.968 (0.872)	0.022 (0.308)	0.080 (0.447)	0.291 (0.781)	-0.521 (0.873)
g_Nosocomiicoccus	0.666966	1.14649	0.947222	0.266744	0.716 (1.080)	0.180 (0.852)	0.005 (0.533)	0.088 (0.482)	-0.852 (0.929)	0.916 (0.819)
g_Brachybacterium	0.655044	1.05608	2.25894	0.383511	0.546 (0.925)	0.225 (1.069)	0.795 (0.944)	0.326 (0.773)	-0.941 (1.019)	0.979 (0.902)
f_Peptococcaceae	0.64925	1.1846	0.511069	0.265225	0.022 (0.205)	0.814 (1.141)	0.004 (0.191)	0.002 (0.045)	-0.300 (0.777)	0.024 (0.428)
f_Peptostreptococcaceae	0.647596	0.986579	0.456086	0.1801	0.056 (0.441)	0.238 (0.849)	0.002 (0.174)	0.116 (0.346)	-0.109 (0.740)	0.596 (0.903)
g_Murdochiella	0.641405	1.07086	0.882519	0.33369	0.573 (0.864)	0.333 (1.051)	0.119 (0.504)	0.003 (0.120)	-0.142 (1.068)	0.304 (0.872)
g_Raoultella	0.639466	1.11112	0.868852	0.31056	0.450 (0.695)	0.402 (1.083)	0.001 (0.700)	0.022 (0.148)	0.734 (1.042)	-0.459 (0.965)
g_Proteus	0.631634	1.11801	3.24592	0.588303	0.602 (0.988)	1.090 (1.126)	-0.101 (0.991)	0.128 (0.466)	-0.844 (1.063)	1.312 (0.917)
f_Fusobacteriaceae	0.626791	0.99827	0.423882	0.161166	0.001 (0.276)	0.672 (0.698)	0.086 (0.454)	0.042 (0.202)	0.224 (1.095)	-0.225 (0.754)
g_Intestinimonas	0.610566	0.901235	0.278161	0.133326	0.024 (0.154)	-0.022 (0.258)	0.014 (0.242)	0.004 (0.064)	0.039 (0.798)	0.688 (0.850)
f_Muribaculaceae	0.603875	0.989014	0.745382	0.196381	0.075 (0.823)	0.667 (0.901)	-0.055 (0.792)	0.021 (0.262)	0.193 (1.006)	0.037 (0.965)
g_Intestinibacter	0.587528	1.04925	0.3263	0.122801	0.979 (0.773)	0.255 (0.789)	0.010 (0.211)	0.002 (0.045)	-0.485 (0.826)	0.169 (0.704)
f_Enterococcaceae	0.586404	1.09433	0.437271	0.175863	-0.013 (0.612)	1.017 (0.776)	-0.002 (0.101)	0.006 (0.078)	-0.420 (0.863)	0.239 (0.659)
g_[Ruminococcus] gnavus group	0.575874	0.93283	0.209343	0.101687	-0.028 (0.223)	0.168 (0.639)	-0.017 (0.676)	0.363 (0.555)	-0.010 (0.702)	0.392 (0.721)
g_Tyzzerella	0.550632	0.877206	0.15811	0.0854473	0.339 (0.681)	0.355 (0.765)	-0.002 (0.162)	0.008 (0.090)	-0.039 (0.432)	0.024 (0.154)
g_Extibacter	0.535152	0.871096	0.208986	0.119065	-0.016 (0.246)	0.550 (0.829)	0.017 (0.213)	0.004 (0.063)	-0.019 (0.399)	0.022 (0.299)
f_Eggerthellaceae	0.527004	0.954382	0.26089	0.135373	0.006 (0.149)	0.081 (0.522)	-0.002 (0.135)	0.002 (0.045)	0.010 (0.711)	0.560 (0.907)
f_Alcaligenaceae	0.484688	1.06529	0.884335	0.20987	-0.016 (0.689)	-0.059 (1.025)	-0.519 (0.847)	0.014 (0.298)	-0.599 (0.923)	1.322 (0.874)
f_Oscillospiraceae	0.463667	1.0614	0.898225	0.26282	0.043 (0.552)	0.032 (0.963)	-0.101 (0.700)	0.030 (0.408)	0.292 (1.060)	0.463 (0.980)
g_[Eubacterium] yurii group	0.460077	1.08736	0.357566	0.129351	0.864 (0.932)	0.102 (0.388)	0.006 (0.371)	-0.014 (0.206)	-0.117 (0.844)	-0.582 (0.875)
g_Alcaligenes	0.459566	1.02062	1.43086	0.27966	0.233 (0.976)	0.794 (0.899)	-0.652 (1.129)	0.243 (0.470)	-0.645 (0.975)	0.560 (0.992)
g_Salmonella	0.452704	1.10035	0.628042	0.197048	-0.136 (0.546)	0.227 (1.091)	0.059 (0.413)	0.004 (0.110)	-0.579 (0.848)	1.016 (0.733)
g_UCG-002	0.435926	1.02498	0.772822	0.228589	0.041 (0.684)	0.093 (0.814)	0.200 (0.601)	0.025 (0.172)	0.144 (0.985)	0.325 (0.995)
g_Saccharofermentans	0.431227	0.661552	0.079522	0.0657912	0.000 (0.000)	0.004 (0.064)	0.480 (0.608)	0.002 (0.045)	-0.036 (0.275)	-0.012 (0.127)
f_Bacteroidales RF16 group	0.419337	1.11914	0.461237	0.237968	0.085 (0.320)	0.056 (0.316)	-0.188 (0.654)	0.024 (0.178)	0.862 (0.955)	-0.115 (1.053)
g_Providencia	0.414874	0.979038	1.12987	0.214081	0.086 (0.919)	0.455 (1.027)	-0.010 (0.972)	0.031 (0.296)	-0.495 (0.995)	0.533 (0.956)
g_Chlamydia	0.409489	1.05352	1.07835	0.445778	0.641 (0.748)	0.260 (0.689)	-0.333 (0.701)	0.002 (0.078)	-0.028 (0.261)	0.056 (0.271)
g_Dysgonomonas	0.386874	1.0551	0.462867	0.166933	0.269 (1.005)	0.030 (0.540)	0.013 (0.149)	0.066 (0.350)	0.006 (0.748)	0.179 (0.980)
g_Psychrobacter	0.368121	1.05965	1.57802	0.289757	0.021 (0.943)	0.279 (1.026)	-0.166 (0.912)	0.298 (0.612)	0.016 (1.069)	0.168 (1.024)
g_Fermentimonas	0.366793	0.780753	0.126288	0.0762233	0.182 (0.409)	-0.008 (0.127)	0.277 (0.698)	0.000 (0.000)	-0.032 (0.471)	0.010 (0.242)
g_Colidextribacter	0.361754	1.02596	0.392346	0.15542	-0.038 (0.278)	0.705 (0.931)	-0.022 (0.706)	0.004 (0.064)	-0.480 (0.859)	0.079 (0.616)
g_Flavonifractor	0.356226	0.723081	0.115504	0.0671756	-0.008 (0.110)	0.284 (0.529)	0.108 (0.533)	0.000 (0.000)	-0.013 (0.277)	0.035 (0.305)
g_Pigmentiphaga	0.340429	1.21848	0.6308	0.272196	-0.074 (0.369)	0.648 (1.125)	0.031 (0.580)	0.002 (0.045)	-0.546 (0.740)	0.154 (0.721)
g_Mediterraneibacter	0.32806	0.99428	0.449086	0.160731	-0.001 (0.622)	0.451 (0.880)	-0.029 (0.497)	0.020 (0.141)	-0.096 (0.952)	0.136 (0.883)
g_Slackia	0.324167	1.07116	0.609189	0.191817	0.632 (0.860)	0.302 (0.733)	0.137 (0.518)	0.168 (0.408)	0.037 (1.065)	-0.740 (0.865)
g_Lachnospira	0.304404	0.953432	0.2176	0.113472	0.059 (0.263)	0.081 (0.593)	0.009 (0.174)	0.006 (0.078)	-0.012 (0.501)	0.245 (0.883)
f_Tannerellaceae	0.286367	0.938231	0.136978	0.0780598	0.150 (0.660)	-0.001 (0.254)	0.016 (0.126)	0.008 (0.090)	0.133 (0.571)	0.078 (0.764)
f_Corynebacteriaceae	0.285427	1.0765	0.357043	0.123454	0.788 (0.822)	-0.009 (0.505)	0.063 (0.420)	0.018 (0.134)	-0.587 (0.790)	-0.139 (0.699)
g_Mycobacterium	0.275499	1.11159	2.03766	0.377364	-0.094 (0.963)	1.257 (0.961)	0.836 (0.956)	0.080 (0.420)	-1.659 (0.902)	0.724 (1.026)
g_Sarcina	0.27494	0.505277	0.0549051	0.0489693	0.002 (0.045)	0.263 (0.482)	0.000 (0.000)	0.000 (0.000)	-0.002 (0.119)	0.018 (0.148)
g_Prevotellaceae NK3B31 group	0.266918	1.12051	0.699657	0.258605	0.007 (0.407)	0.692 (0.916)	0.231 (0.638)	0.010 (0.100)	-1.029 (0.975)	0.920 (0.766)
g_Jeotgalibaca	0.263628	0.74515	0.122009	0.0958725	0.012 (0.127)	0.141 (0.603)	0.000 (0.000)	0.004 (0.064)	0.209 (0.543)	-0.007 (0.427)
g_Mammaliicoccus	0.261581	1.17929	1.29615	0.320831	-0.179 (0.687)	0.662 (1.181)	-0.046 (1.091)	0.264 (0.473)	-0.484 (0.988)	0.319 (0.816)
g_Fournierella	0.248622	0.52804	0.0405629	0.0391597	0.006 (0.078)	0.260 (0.473)	-0.002 (0.045)	0.000 (0.000)	-0.007 (0.211)	-0.003 (0.110)
g_NK4A214 group	0.246054	0.94452	0.191863	0.0850202	0.016 (0.190)	0.272 (0.567)	-0.007 (0.317)	0.002 (0.101)	0.052 (0.818)	0.082 (0.741)
g_Merdibacter	0.236825	0.470909	0.169422	0.10156	0.000 (0.000)	0.000 (0.000)	0.000 (0.000)	0.000 (0.000)	0.111 (0.346)	0.150 (0.371)
g_Alloscardovia	0.236714	1.06525	0.437795	0.16642	0.106 (0.505)	0.264 (0.635)	0.514 (0.726)	0.010 (0.100)	-0.219 (1.004)	-0.047 (0.612)
g_Clostridium	0.235509	1.06765	1.35334	0.269085	0.095 (0.926)	0.251 (1.056)	0.096 (0.824)	0.843 (0.690)	-0.912 (0.939)	0.299 (1.019)
g_Lachnospiraceae UCG-008	0.205936	0.424953	0.122891	0.0926446	0.205 (0.423)	0.002 (0.045)	0.000 (0.000)	0.000 (0.000)	0.000 (0.000)	0.000 (0.000)
g_Proteiniphilum	0.165474	0.720952	0.0877176	0.0563206	-0.008 (0.156)	0.246 (0.531)	0.036 (0.343)	0.000 (0.000)	-0.123 (0.466)	0.035 (0.323)
g_Allisonella	0.146725	0.59967	0.0471995	0.0371082	-0.002 (0.119)	0.034 (0.334)	0.004 (0.064)	0.002 (0.045)	0.096 (0.499)	0.037 (0.271)
g_Pediococcus	0.145003	0.691917	0.116899	0.0716112	-0.002 (0.078)	0.010 (0.149)	0.004 (0.063)	-0.006 (0.078)	-0.021 (0.404)	0.166 (0.621)
g_Acetoanaerobium	0.137044	0.393619	0.0478687	0.0493962	0.000 (0.000)	0.000 (0.000)	0.153 (0.366)	0.000 (0.000)	-0.010 (0.100)	-0.006 (0.078)
g_Turicibacter	0.13598	1.0667	0.455204	0.154181	0.497 (0.695)	0.172 (0.569)	-0.119 (0.671)	0.012 (0.110)	-0.185 (0.856)	-0.114 (0.929)
g_Trueperella	0.127818	0.980954	0.173612	0.0981343	-0.002 (0.174)	0.280 (0.902)	-0.002 (0.101)	0.000 (0.000)	-0.158 (0.495)	-0.051 (0.578)
g_UCG-004	0.121719	0.531715	0.0545783	0.0443641	0.008 (0.090)	0.109 (0.417)	-0.002 (0.101)	0.000 (0.000)	-0.016 (0.291)	0.033 (0.223)
g_Christensenella	0.119821	0.416925	0.0787239	0.0613327	-0.002 (0.045)	0.008 (0.090)	0.077 (0.270)	0.000 (0.000)	-0.012 (0.109)	0.055 (0.323)
g_Christensenellaceae R-7 group	0.114582	1.05245	0.615113	0.192218	0.146 (0.786)	0.317 (0.880)	-0.078 (0.861)	0.018 (0.250)	-0.112 (0.996)	-0.077 (0.949)
g_Sutterella	0.112397	0.97183	0.251041	0.0906606	0.033 (0.451)	0.228 (0.849)	0.003 (0.191)	0.120 (0.338)	-0.278 (0.760)	0.005 (0.628)
g_Conchiformibius	0.111375	1.05564	0.455607	0.153751	0.290 (0.791)	0.554 (0.905)	0.028 (0.290)	-0.002 (0.135)	-0.523 (0.867)	-0.148 (0.698)
g_Kingella	0.111153	1.06606	1.64021	0.338256	0.083 (0.972)	0.368 (1.022)	-0.191 (0.867)	1.115 (0.816)	-0.457 (1.006)	-0.456 (0.996)
g_type III	0.109363	0.324878	0.0651228	0.065244	0.000 (0.000)	0.000 (0.000)	0.104 (0.314)	0.000 (0.000)	0.010 (0.100)	0.000 (0.000)
g_Bordetella	0.103743	0.678281	0.0855991	0.0614654	0.113 (0.613)	-0.006 (0.340)	-0.006 (0.078)	0.000 (0.000)	-0.002 (0.101)	0.002 (0.045)
g_Rectinema	0.0973544	0.306194	0.225072	0.123435	0.000 (0.000)	0.000 (0.000)	0.000 (0.000)	0.000 (0.000)	-0.004 (0.063)	0.101 (0.305)
g_F0332	0.0939397	1.21903	1.12062	0.257641	1.297 (1.183)	-0.002 (0.910)	0.172 (0.746)	0.033 (0.279)	-1.188 (0.846)	-0.306 (1.026)
f_Gastranaerophilaceae	0.0929944	0.851607	0.19747	0.114426	-0.010 (0.119)	-0.053 (0.426)	0.002 (0.101)	0.002 (0.045)	-0.128 (0.666)	0.343 (0.533)
g_Limosilactobacillus	0.0927263	1.09236	1.40167	0.330226	-0.106 (0.679)	0.788 (0.868)	0.229 (1.027)	0.045 (0.254)	0.298 (1.046)	-1.097 (0.985)
g_Tetragenococcus	0.0908298	0.314149	0.129712	0.0969817	0.000 (0.000)	0.096 (0.300)	0.000 (0.000)	0.000 (0.000)	-0.006 (0.078)	0.002 (0.045)
g_Butyribacter	0.0894924	0.738467	0.0620057	0.0443923	0.110 (0.411)	0.038 (0.385)	-0.006 (0.206)	0.000 (0.000)	-0.072 (0.554)	0.030 (0.204)
g_Sphaerochaeta	0.0865586	0.491138	0.0577812	0.0468835	0.000 (0.000)	0.004 (0.064)	0.097 (0.299)	0.000 (0.000)	-0.022 (0.287)	0.012 (0.311)
g_Catenisphaera	0.0858197	0.37485	0.041943	0.0381916	0.006 (0.078)	0.000 (0.000)	-0.004 (0.064)	0.000 (0.000)	0.061 (0.331)	0.024 (0.154)
f_Carnobacteriaceae	0.081551	1.04792	0.674857	0.185939	0.200 (0.698)	-0.009 (1.033)	0.035 (0.933)	0.004 (0.180)	0.120 (0.987)	-0.077 (0.891)
g_Atopostipes	0.0801137	1.02585	0.78111	0.232991	0.585 (0.804)	0.081 (0.592)	0.111 (0.499)	0.452 (0.637)	-1.321 (0.810)	0.584 (0.905)
g_Hungatella	0.0799473	0.460425	0.0594461	0.0522493	-0.002 (0.045)	0.068 (0.261)	0.046 (0.250)	0.000 (0.000)	-0.010 (0.250)	-0.015 (0.190)
g_Atopococcus	0.0787304	0.29842	0.088821	0.072938	0.002 (0.045)	0.000 (0.000)	0.000 (0.000)	0.000 (0.000)	0.081 (0.280)	-0.004 (0.090)
g_Helicobacter	0.0782268	0.862607	0.0941012	0.0690314	0.107 (0.829)	0.014 (0.149)	-0.008 (0.110)	0.004 (0.063)	-0.007 (0.277)	-0.033 (0.264)
f_Rikenellaceae	0.0763692	0.738049	0.0715784	0.0584585	-0.068 (0.458)	0.247 (0.503)	-0.024 (0.219)	0.000 (0.000)	-0.087 (0.444)	-0.000 (0.090)
g_Citricoccus	0.0762115	1.11733	0.995016	0.288857	0.014 (0.710)	0.582 (1.019)	-0.060 (0.613)	0.546 (0.607)	-1.123 (0.821)	0.299 (0.943)
g_Candidatus Hamiltonella	0.0760601	0.277968	0.0235507	0.0292328	0.000 (0.000)	0.002 (0.045)	0.000 (0.000)	0.000 (0.000)	-0.002 (0.045)	0.076 (0.271)
g_Lachnoclostridium	0.0742961	0.862773	0.126033	0.0790092	0.004 (0.064)	0.013 (0.233)	-0.004 (0.142)	0.000 (0.000)	-0.081 (0.681)	0.180 (0.637)
g_Lachnospiraceae UCG-010	0.0736974	0.972519	0.163953	0.0893285	0.024 (0.219)	0.134 (0.681)	-0.006 (0.119)	0.004 (0.063)	-0.361 (0.654)	0.303 (0.742)
g_Prevotellaceae UCG-004	0.0655292	0.961483	0.156472	0.0954945	-0.002 (0.162)	0.016 (0.179)	-0.012 (0.464)	0.006 (0.078)	0.028 (0.703)	0.073 (0.857)
g_Sneathia	0.0643897	1.18094	1.87071	0.463283	0.104 (0.509)	0.762 (0.978)	0.033 (0.548)	0.026 (0.194)	-1.193 (1.031)	0.764 (1.308)
g_Ileibacterium	0.0581963	0.364547	0.0146666	0.0218358	-0.004 (0.110)	0.069 (0.333)	-0.002 (0.045)	0.000 (0.000)	-0.002 (0.101)	-0.004 (0.090)
g_Enterocloster	0.054661	0.830595	0.123328	0.0743043	0.016 (0.126)	0.057 (0.426)	-0.006 (0.555)	0.002 (0.045)	-0.059 (0.599)	0.070 (0.530)
g_Anaerocella	0.0545525	0.791622	0.100686	0.0913964	0.004 (0.063)	0.002 (0.045)	0.002 (0.045)	0.002 (0.045)	0.170 (0.431)	-0.068 (0.758)
f_Cardiobacteriaceae	0.054529	0.614689	0.17549	0.0926176	-0.010 (0.135)	-0.002 (0.078)	0.052 (0.223)	0.010 (0.100)	0.110 (0.325)	-0.090 (0.490)
g_DTU089	0.054231	0.582826	0.0870636	0.0714753	0.000 (0.000)	0.000 (0.000)	-0.094 (0.444)	0.000 (0.000)	0.072 (0.316)	0.102 (0.313)
g_Clostridioides	0.0540608	0.364411	0.0409396	0.0432188	0.000 (0.000)	0.000 (0.064)	0.083 (0.283)	0.000 (0.000)	-0.027 (0.227)	0.000 (0.064)
g_Harryflintia	0.0527796	0.2409	0.0607719	0.0542318	0.000 (0.000)	-0.002 (0.045)	0.000 (0.000)	0.000 (0.000)	0.055 (0.236)	0.000 (0.000)
g_Moellerella	0.0517772	0.252471	0.0184846	0.0252126	0.000 (0.000)	0.000 (0.000)	0.000 (0.000)	0.000 (0.000)	0.012 (0.168)	0.043 (0.206)
g_[Eubacterium] siraeum group	0.0507035	0.9372	0.135648	0.0747154	-0.008 (0.142)	0.166 (0.859)	-0.004 (0.110)	0.000 (0.000)	-0.165 (0.608)	0.052 (0.370)
g_Varibaculum	0.0504521	1.04544	0.97184	0.224504	0.014 (0.696)	-0.119 (1.013)	0.096 (0.608)	0.020 (0.324)	-0.904 (0.918)	1.091 (0.767)
g_Buchnera	0.0488229	1.05893	0.553471	0.216457	0.245 (0.869)	-0.053 (0.631)	0.402 (0.715)	-0.004 (0.090)	-0.441 (0.757)	-0.132 (0.659)
g_Amylolactobacillus	0.0484558	0.276979	0.0381337	0.038712	-0.002 (0.045)	0.000 (0.000)	0.000 (0.000)	0.000 (0.000)	-0.012 (0.110)	0.062 (0.255)
g_Citrobacter	0.0463407	1.0665	0.51883	0.188651	0.547 (0.625)	0.797 (0.791)	0.010 (0.162)	0.004 (0.090)	-1.109 (0.803)	0.042 (0.496)
g_Mobilitalea	0.0425419	0.221203	0.0429681	0.0478024	0.000 (0.000)	0.045 (0.216)	0.000 (0.000)	0.000 (0.000)	-0.002 (0.045)	0.000 (0.000)
g_Fructobacillus	0.0418628	0.225555	0.0228094	0.0304408	0.000 (0.000)	-0.000 (0.064)	0.000 (0.000)	0.000 (0.000)	-0.002 (0.045)	0.045 (0.211)
g_Anaerovibrio	0.0411599	0.406603	0.0299482	0.0334992	0.002 (0.045)	0.046 (0.246)	-0.002 (0.045)	0.000 (0.000)	-0.025 (0.330)	0.026 (0.160)
f_Erysipelatoclostridiaceae	0.0408867	0.254574	0.0100959	0.0180253	0.002 (0.045)	0.000 (0.000)	0.002 (0.045)	0.000 (0.000)	-0.009 (0.119)	0.049 (0.219)
g_Paucilactobacillus	0.038178	0.202538	0.02115	0.032045	0.000 (0.000)	0.000 (0.000)	0.000 (0.000)	0.000 (0.000)	0.018 (0.148)	0.022 (0.148)
g_SP3-e08	0.0370217	0.247803	0.036114	0.0385107	0.000 (0.000)	0.000 (0.000)	0.000 (0.000)	-0.002 (0.045)	0.024 (0.178)	0.016 (0.168)
g_Ligilactobacillus	0.0368767	1.07215	0.579749	0.163523	0.265 (0.640)	0.538 (0.967)	-0.111 (0.594)	0.012 (0.110)	-0.528 (0.929)	-0.137 (0.971)
g_Loigolactobacillus	0.0361612	0.187312	0.0158774	0.0209776	0.002 (0.045)	0.000 (0.000)	0.000 (0.000)	0.000 (0.000)	0.000 (0.000)	0.034 (0.182)
g_Lachnospiraceae NK4A136 group	0.0356522	0.886323	0.155263	0.076773	0.049 (0.268)	0.024 (0.421)	-0.026 (0.362)	0.018 (0.134)	-0.129 (0.755)	0.105 (0.639)
g_Mannheimia	0.03362	1.10946	1.50766	0.329277	0.467 (0.975)	0.475 (0.969)	-0.216 (0.824)	-0.010 (0.288)	-0.465 (0.971)	-0.690 (0.942)
g_Anaerotaenia	0.0330083	0.182652	0.052081	0.0464497	0.000 (0.000)	0.000 (0.000)	0.000 (0.000)	0.000 (0.000)	0.012 (0.110)	0.022 (0.148)
g_Acetitomaculum	0.032313	0.429702	0.0376112	0.0526753	0.000 (0.000)	0.004 (0.064)	0.002 (0.119)	0.000 (0.000)	0.019 (0.365)	0.014 (0.242)
g_Lachnospiraceae UCG-003	0.0321477	0.329009	0.0600569	0.05576	-0.004 (0.064)	0.014 (0.118)	0.000 (0.000)	0.016 (0.126)	-0.028 (0.199)	0.034 (0.182)
g_Agathobaculum	0.0310343	0.880615	0.143166	0.0785065	-0.022 (0.224)	0.083 (0.634)	0.019 (0.200)	0.208 (0.437)	-0.256 (0.617)	0.038 (0.492)
g_Paraperlucidibaca	0.0309788	0.177235	0.0226648	0.0344134	0.000 (0.000)	0.031 (0.177)	0.000 (0.000)	0.000 (0.000)	0.000 (0.000)	0.000 (0.000)
g_Tessaracoccus	0.0271299	0.41048	0.022665	0.0260546	0.000 (0.000)	0.000 (0.000)	-0.026 (0.287)	0.000 (0.000)	0.007 (0.210)	0.050 (0.219)
f_Spirochaetaceae	0.0269682	0.260979	0.0226879	0.0285772	0.000 (0.000)	0.047 (0.215)	0.000 (0.000)	0.000 (0.000)	-0.020 (0.141)	0.000 (0.000)
g_Dielma	0.026131	0.214118	0.0401388	0.043813	-0.002 (0.045)	0.006 (0.078)	0.000 (0.000)	0.000 (0.000)	0.026 (0.184)	-0.004 (0.063)
g_V9D2013 group	0.0249679	0.17257	0.0889443	0.0690128	0.000 (0.000)	0.004 (0.064)	-0.002 (0.045)	0.000 (0.000)	0.023 (0.154)	0.000 (0.000)
g_Asaccharobacter	0.0221108	0.14757	0.00426771	0.0107802	0.020 (0.141)	0.000 (0.000)	0.000 (0.000)	0.000 (0.000)	0.002 (0.078)	0.000 (0.000)
g_Riemerella	0.0201008	0.167056	0.0263292	0.0320967	0.000 (0.000)	0.024 (0.154)	0.000 (0.000)	0.000 (0.000)	-0.004 (0.063)	0.000 (0.000)
g_Paraclostridium	0.0183171	0.759281	0.167058	0.0915528	0.048 (0.258)	0.183 (0.405)	0.015 (0.430)	0.000 (0.000)	-0.217 (0.512)	-0.006 (0.295)
g_Gallicola	0.0180772	0.195208	0.0130967	0.020202	0.002 (0.045)	0.014 (0.118)	0.000 (0.000)	0.000 (0.000)	0.006 (0.100)	-0.004 (0.110)
g_Companilactobacillus	0.0180692	0.205383	0.010812	0.0207564	0.000 (0.000)	0.000 (0.000)	0.000 (0.000)	0.000 (0.000)	0.002 (0.162)	0.016 (0.126)
g_Macrococcus	0.0163035	1.00174	0.548844	0.187058	0.132 (0.590)	0.557 (0.780)	0.103 (0.543)	0.018 (0.148)	-0.650 (0.940)	0.055 (0.908)
g_Haematomicrobium	0.0140705	0.134238	0.0170063	0.0241571	0.000 (0.000)	0.012 (0.110)	0.000 (0.000)	0.000 (0.000)	0.002 (0.078)	0.000 (0.000)
g_Paenarthrobacter	0.0115103	1.08746	0.850236	0.239835	-0.055 (0.849)	-0.181 (1.009)	0.080 (0.342)	0.018 (0.195)	-0.486 (0.949)	0.462 (1.042)
g_Luteococcus	0.0111846	0.250119	0.0133218	0.0186722	0.000 (0.000)	0.008 (0.089)	0.000 (0.000)	0.000 (0.000)	-0.003 (0.229)	0.006 (0.078)
g_Pluralibacter	0.0108907	0.141956	0.00689002	0.01342	0.000 (0.000)	0.000 (0.000)	0.000 (0.000)	0.000 (0.000)	0.000 (0.000)	0.011 (0.142)
g_Lachnospiraceae UCG-002	0.0100504	0.1001	0.00321689	0.00833262	0.000 (0.000)	0.000 (0.000)	0.000 (0.000)	0.000 (0.000)	0.000 (0.000)	0.010 (0.100)
g_Bowdeniella	0.0100369	0.0999661	0.00773141	0.015992	0.000 (0.000)	0.010 (0.100)	0.000 (0.000)	0.000 (0.000)	0.000 (0.000)	0.000 (0.000)
g_Lachnospiraceae AC2044 group	0.00906886	0.454501	0.0480719	0.0403641	0.000 (0.064)	-0.014 (0.206)	0.000 (0.000)	0.000 (0.000)	-0.051 (0.283)	0.078 (0.295)
g_Lapidilactobacillus	0.0080403	0.0896227	0.0425009	0.0434537	0.000 (0.000)	0.000 (0.000)	0.000 (0.000)	0.000 (0.000)	0.002 (0.045)	0.006 (0.078)
f_Chlamydiaceae	0.00803357	0.109851	0.0212513	0.026593	0.000 (0.000)	0.000 (0.000)	0.000 (0.000)	0.000 (0.000)	-0.002 (0.045)	0.010 (0.100)
g_Megamonas	0.00695282	1.00505	0.233098	0.102705	0.027 (0.321)	0.160 (0.933)	-0.028 (0.490)	0.027 (0.165)	-0.206 (0.747)	-0.008 (0.601)
g_Candidatus Lumbricincola	0.00603023	0.0776937	0.0251108	0.0347582	0.000 (0.000)	0.000 (0.000)	0.000 (0.000)	0.000 (0.000)	0.000 (0.000)	0.006 (0.078)
g_Gordonibacter	0.00603023	0.100423	0.00286493	0.00878926	0.000 (0.000)	0.000 (0.000)	0.000 (0.000)	0.000 (0.000)	0.000 (0.064)	0.006 (0.078)
g_Snodgrassella	0.00603023	0.0776937	0.00217659	0.00915306	0.000 (0.000)	0.000 (0.000)	0.000 (0.000)	0.000 (0.000)	0.004 (0.064)	0.002 (0.045)
g_Liquorilactobacillus	0.00486042	0.196124	0.0119638	0.0194884	0.000 (0.000)	0.021 (0.148)	0.000 (0.000)	0.000 (0.000)	-0.016 (0.126)	0.000 (0.000)
g_Mageeibacillus	0.00402689	0.168255	0.11565	0.0806592	0.000 (0.000)	0.008 (0.142)	0.000 (0.000)	0.000 (0.000)	-0.004 (0.090)	0.000 (0.000)
g_Mesomycoplasma	0.00402015	0.142219	0.00589845	0.0137531	0.000 (0.000)	0.000 (0.000)	0.000 (0.000)	0.000 (0.000)	-0.006 (0.100)	0.010 (0.100)
g_Cricetibacter	0.00201008	0.0449467	0.000959404	0.00421128	0.000 (0.000)	0.000 (0.000)	0.000 (0.000)	0.000 (0.000)	0.002 (0.045)	0.000 (0.000)
g_Brooklawnia	0.00201008	0.0449467	0.00187796	0.00838846	0.000 (0.000)	0.000 (0.000)	0.000 (0.000)	0.000 (0.000)	0.002 (0.045)	0.000 (0.000)
g_Pusillibacter	0.00201008	0.0449467	0.0891919	0.0689745	0.000 (0.000)	0.000 (0.000)	0.000 (0.000)	0.000 (0.000)	0.002 (0.045)	0.000 (0.000)
g_Spirochaeta 2	0.00201008	0.0449467	0.00654925	0.0158633	0.000 (0.000)	0.000 (0.000)	0.000 (0.000)	0.000 (0.000)	0.002 (0.045)	0.000 (0.000)
g_Sporacetigenium	0.00201008	0.0449467	0.00171049	0.00701353	0.000 (0.000)	0.000 (0.000)	0.000 (0.000)	0.000 (0.000)	0.002 (0.045)	0.000 (0.000)
g_Dolosicoccus	0.00201008	0.0449467	0.00638844	0.0166562	0.000 (0.000)	0.000 (0.000)	0.000 (0.000)	0.000 (0.000)	0.000 (0.000)	0.002 (0.045)
g_Permianibacter	0.00201008	0.0449467	0.000177186	0.0019475	0.000 (0.000)	0.000 (0.000)	0.000 (0.000)	0.000 (0.000)	0.002 (0.045)	0.000 (0.000)
f_Dysgonomonadaceae	0.00197942	0.837196	0.117124	0.0652487	0.039 (0.550)	-0.012 (0.180)	0.004 (0.110)	0.004 (0.064)	-0.184 (0.659)	0.217 (0.532)
g_Levilactobacillus	0.00192182	0.462578	0.0552332	0.0472301	0.000 (0.000)	0.064 (0.324)	0.015 (0.127)	0.000 (0.000)	-0.080 (0.305)	0.006 (0.078)
g_Agitococcus	0.00164187	0.662146	0.0782941	0.0616558	0.000 (0.000)	0.048 (0.288)	0.000 (0.000)	0.000 (0.000)	-0.117 (0.567)	0.098 (0.303)
g_Faecalibaculum	0.000802555	0.368199	0.0268965	0.0318709	0.002 (0.045)	0.026 (0.160)	-0.002 (0.045)	0.000 (0.064)	-0.002 (0.045)	-0.019 (0.327)
g_Hypnocyclicus	6.73394e-06	0.168303	0.00805061	0.0161829	0.000 (0.000)	0.004 (0.064)	0.000 (0.000)	0.000 (0.000)	-0.010 (0.135)	0.006 (0.078)
g_Paludicola	4.46289e-19	0.0636278	0.00299742	0.00779936	0.000 (0.000)	0.000 (0.000)	0.000 (0.000)	0.000 (0.000)	-0.002 (0.045)	0.002 (0.045)
g_Acetivibrio	0	0	0.00220944	0.00833268	0.000 (0.000)	0.000 (0.000)	0.000 (0.000)	0.000 (0.000)	0.000 (0.000)	0.000 (0.000)
g_Allofustis	0	0	0.000255263	0.00256187	0.000 (0.000)	0.000 (0.000)	0.000 (0.000)	0.000 (0.000)	0.000 (0.000)	0.000 (0.000)
g_Amedibacillus	0	0	0.000651731	0.00411252	0.000 (0.000)	0.000 (0.000)	0.000 (0.000)	0.000 (0.000)	0.000 (0.000)	0.000 (0.000)
g_Anaerobacterium	0	0	0.000757563	0.00405401	0.000 (0.000)	0.000 (0.000)	0.000 (0.000)	0.000 (0.000)	0.000 (0.000)	0.000 (0.000)
g_Anaerofilum	0	0	0.00177522	0.00622993	0.000 (0.000)	0.000 (0.000)	0.000 (0.000)	0.000 (0.000)	0.000 (0.000)	0.000 (0.000)
g_Anaeromicropila	0	0	6.22222e-05	0.000992852	0.000 (0.000)	0.000 (0.000)	0.000 (0.000)	0.000 (0.000)	0.000 (0.000)	0.000 (0.000)
g_Anaerosalibacter	0	0	0.088564	0.0713599	0.000 (0.000)	0.000 (0.000)	0.000 (0.000)	0.000 (0.000)	0.000 (0.000)	0.000 (0.000)
g_Anaerosporobacter	0	0	5.09091e-05	0.00113836	0.000 (0.000)	0.000 (0.000)	0.000 (0.000)	0.000 (0.000)	0.000 (0.000)	0.000 (0.000)
g_Anaerotignum	0	0	0.000278068	0.00267962	0.000 (0.000)	0.000 (0.000)	0.000 (0.000)	0.000 (0.000)	0.000 (0.000)	0.000 (0.000)
g_Apibacter	0	0	0.00119325	0.00529895	0.000 (0.000)	0.000 (0.000)	0.000 (0.000)	0.000 (0.000)	0.000 (0.000)	0.000 (0.000)
g_Aquamonas	0	0	8.33333e-05	0.0010754	0.000 (0.000)	0.000 (0.000)	0.000 (0.000)	0.000 (0.000)	0.000 (0.000)	0.000 (0.000)
g_Asaccharospora	0	0	7.8e-05	0.00126456	0.000 (0.000)	0.000 (0.000)	0.000 (0.000)	0.000 (0.000)	0.000 (0.000)	0.000 (0.000)
g_Auraticoccus	0	0	0.000412193	0.00230622	0.000 (0.000)	0.000 (0.000)	0.000 (0.000)	0.000 (0.000)	0.000 (0.000)	0.000 (0.000)
f_Bacteroidales BS11 gut group	0	0	0.00104443	0.00468814	0.000 (0.000)	0.000 (0.000)	0.000 (0.000)	0.000 (0.000)	0.000 (0.000)	0.000 (0.000)
g_Basfia	0	0	0	0	0.000 (0.000)	0.000 (0.000)	0.000 (0.000)	0.000 (0.000)	0.000 (0.000)	0.000 (0.000)
g_Bavariicoccus	0	0	0.00139728	0.00700526	0.000 (0.000)	0.000 (0.000)	0.000 (0.000)	0.000 (0.000)	0.000 (0.000)	0.000 (0.000)
g_Bergeriella	0	0	0.00133927	0.00484051	0.000 (0.000)	0.000 (0.000)	0.000 (0.000)	0.000 (0.000)	0.000 (0.000)	0.000 (0.000)
g_Bombilactobacillus	0	0	0.00108031	0.00493397	0.000 (0.000)	0.000 (0.000)	0.000 (0.000)	0.000 (0.000)	0.000 (0.000)	0.000 (0.000)
g_Brevifollis	0	0	0.000206667	0.00193169	0.000 (0.000)	0.000 (0.000)	0.000 (0.000)	0.000 (0.000)	0.000 (0.000)	0.000 (0.000)
g_CHKCI002	0	0	0.00561165	0.0148622	0.000 (0.000)	0.000 (0.000)	0.000 (0.000)	0.000 (0.000)	0.000 (0.000)	0.000 (0.000)
g_Candidatus Arthromitus	0	0	9.26667e-05	0.00114641	0.000 (0.000)	0.000 (0.000)	0.000 (0.000)	0.000 (0.000)	0.000 (0.000)	0.000 (0.000)
g_Candidatus Bacilloplasma	0	0	0	0	0.000 (0.000)	0.000 (0.000)	0.000 (0.000)	0.000 (0.000)	0.000 (0.000)	0.000 (0.000)
g_Candidatus Rosenkranzia	0	0	6.8e-05	0.00116193	0.000 (0.000)	0.000 (0.000)	0.000 (0.000)	0.000 (0.000)	0.000 (0.000)	0.000 (0.000)
g_Candidimonas	0	0	0.00350594	0.00961403	0.000 (0.000)	0.000 (0.000)	0.000 (0.000)	0.000 (0.000)	0.000 (0.000)	0.000 (0.000)
g_Coriobacteriaceae UCG-002	0	0	0.000500032	0.00347469	0.000 (0.000)	0.000 (0.000)	0.000 (0.000)	0.000 (0.000)	0.000 (0.000)	0.000 (0.000)
g_Coriobacteriaceae UCG-003	0	0	4e-05	0.000631821	0.000 (0.000)	0.000 (0.000)	0.000 (0.000)	0.000 (0.000)	0.000 (0.000)	0.000 (0.000)
g_Corticimicrobacter	0	0	0.00183785	0.00727491	0.000 (0.000)	0.000 (0.000)	0.000 (0.000)	0.000 (0.000)	0.000 (0.000)	0.000 (0.000)
g_Cosenzaea	0	0	0.000101299	0.0011609	0.000 (0.000)	0.000 (0.000)	0.000 (0.000)	0.000 (0.000)	0.000 (0.000)	0.000 (0.000)
g_Cronobacter	0	0	0.000301274	0.00256501	0.000 (0.000)	0.000 (0.000)	0.000 (0.000)	0.000 (0.000)	0.000 (0.000)	0.000 (0.000)
g_Culicoidibacter	0	0	0.00159257	0.00573251	0.000 (0.000)	0.000 (0.000)	0.000 (0.000)	0.000 (0.000)	0.000 (0.000)	0.000 (0.000)
g_Cuneatibacter	0	0	9.31538e-05	0.00104434	0.000 (0.000)	0.000 (0.000)	0.000 (0.000)	0.000 (0.000)	0.000 (0.000)	0.000 (0.000)
g_DMER64	0	0	0.0119271	0.0211773	0.000 (0.000)	0.000 (0.000)	0.000 (0.000)	0.000 (0.000)	0.000 (0.000)	0.000 (0.000)
g_Daejeonia	0	0	0.0020316	0.00765358	0.000 (0.000)	0.000 (0.000)	0.000 (0.000)	0.000 (0.000)	0.000 (0.000)	0.000 (0.000)
g_Denitrobacterium	0	0	0.000347644	0.00317847	0.000 (0.000)	0.000 (0.000)	0.000 (0.000)	0.000 (0.000)	0.000 (0.000)	0.000 (0.000)
g_Derxia	0	0	0.00105755	0.00553707	0.000 (0.000)	0.000 (0.000)	0.000 (0.000)	0.000 (0.000)	0.000 (0.000)	0.000 (0.000)
g_Enterobacillus	0	0	0.00825423	0.0145826	0.000 (0.000)	0.000 (0.000)	0.000 (0.000)	0.000 (0.000)	0.000 (0.000)	0.000 (0.000)
g_Ercella	0	0	0.00394093	0.0103403	0.000 (0.000)	0.000 (0.000)	0.000 (0.000)	0.000 (0.000)	0.000 (0.000)	0.000 (0.000)
g_Faecalicatena	0	0	0.00078413	0.00411801	0.000 (0.000)	0.000 (0.000)	0.000 (0.000)	0.000 (0.000)	0.000 (0.000)	0.000 (0.000)
g_Floricoccus	0	0	0	0	0.000 (0.000)	0.000 (0.000)	0.000 (0.000)	0.000 (0.000)	0.000 (0.000)	0.000 (0.000)
g_Franconibacter	0	0	0.0185419	0.0256615	0.000 (0.000)	0.000 (0.000)	0.000 (0.000)	0.000 (0.000)	0.000 (0.000)	0.000 (0.000)
g_GCA-900066755	0	0	0.000233291	0.00395924	0.000 (0.000)	0.000 (0.000)	0.000 (0.000)	0.000 (0.000)	0.000 (0.000)	0.000 (0.000)
g_Gallibacterium	0	0	8.88889e-05	0.00115671	0.000 (0.000)	0.000 (0.000)	0.000 (0.000)	0.000 (0.000)	0.000 (0.000)	0.000 (0.000)
g_Galliscardovia	0	0	0.0215794	0.0293463	0.000 (0.000)	0.000 (0.000)	0.000 (0.000)	0.000 (0.000)	0.000 (0.000)	0.000 (0.000)
g_Granulicoccus	0	0	0.00010381	0.00147709	0.000 (0.000)	0.000 (0.000)	0.000 (0.000)	0.000 (0.000)	0.000 (0.000)	0.000 (0.000)
g_Helcobacillus	0	0	0.0278701	0.0343274	0.000 (0.000)	0.000 (0.000)	0.000 (0.000)	0.000 (0.000)	0.000 (0.000)	0.000 (0.000)
g_Hoyosella	0	0	8.875e-05	0.0011814	0.000 (0.000)	0.000 (0.000)	0.000 (0.000)	0.000 (0.000)	0.000 (0.000)	0.000 (0.000)
g_Kandleria	0	0	0.000423252	0.00252432	0.000 (0.000)	0.000 (0.000)	0.000 (0.000)	0.000 (0.000)	0.000 (0.000)	0.000 (0.000)
g_Keratinibaculum	0	0	0	0	0.000 (0.000)	0.000 (0.000)	0.000 (0.000)	0.000 (0.000)	0.000 (0.000)	0.000 (0.000)
g_Lachnospiraceae FE2018 group	0	0	0.000861672	0.00516366	0.000 (0.000)	0.000 (0.000)	0.000 (0.000)	0.000 (0.000)	0.000 (0.000)	0.000 (0.000)
g_Lachnospiraceae NK4B4 group	0	0	0.000156429	0.00192525	0.000 (0.000)	0.000 (0.000)	0.000 (0.000)	0.000 (0.000)	0.000 (0.000)	0.000 (0.000)
g_Malacoplasma	0	0	5.2e-05	0.000843041	0.000 (0.000)	0.000 (0.000)	0.000 (0.000)	0.000 (0.000)	0.000 (0.000)	0.000 (0.000)
g_Mangrovibacter	0	0	0.000282975	0.00201175	0.000 (0.000)	0.000 (0.000)	0.000 (0.000)	0.000 (0.000)	0.000 (0.000)	0.000 (0.000)
g_Metamycoplasma	0	0	2.66667e-05	0.000596285	0.000 (0.000)	0.000 (0.000)	0.000 (0.000)	0.000 (0.000)	0.000 (0.000)	0.000 (0.000)
g_Miniphocaeibacter	0	0	4.66667e-05	0.000744639	0.000 (0.000)	0.000 (0.000)	0.000 (0.000)	0.000 (0.000)	0.000 (0.000)	0.000 (0.000)
f_Mycobacteriaceae	0	0	7.30905e-05	0.000996713	0.000 (0.000)	0.000 (0.000)	0.000 (0.000)	0.000 (0.000)	0.000 (0.000)	0.000 (0.000)
g_Ndongobacter	0	0	0.00139891	0.0058032	0.000 (0.000)	0.000 (0.000)	0.000 (0.000)	0.000 (0.000)	0.000 (0.000)	0.000 (0.000)
g_Neoscardovia	0	0	0.00146306	0.00605491	0.000 (0.000)	0.000 (0.000)	0.000 (0.000)	0.000 (0.000)	0.000 (0.000)	0.000 (0.000)
g_Nicoletella	0	0	0.00117496	0.00584447	0.000 (0.000)	0.000 (0.000)	0.000 (0.000)	0.000 (0.000)	0.000 (0.000)	0.000 (0.000)
g_Nostocoida	0	0	0.000112222	0.00117932	0.000 (0.000)	0.000 (0.000)	0.000 (0.000)	0.000 (0.000)	0.000 (0.000)	0.000 (0.000)
g_Oenococcus	0	0	0.000280556	0.0024171	0.000 (0.000)	0.000 (0.000)	0.000 (0.000)	0.000 (0.000)	0.000 (0.000)	0.000 (0.000)
g_Papillibacter	0	0	0.00218976	0.0063609	0.000 (0.000)	0.000 (0.000)	0.000 (0.000)	0.000 (0.000)	0.000 (0.000)	0.000 (0.000)
g_Parolsenella	0	0	0.00103527	0.00559215	0.000 (0.000)	0.000 (0.000)	0.000 (0.000)	0.000 (0.000)	0.000 (0.000)	0.000 (0.000)
g_Pauljensenia	0	0	0.000383185	0.00292466	0.000 (0.000)	0.000 (0.000)	0.000 (0.000)	0.000 (0.000)	0.000 (0.000)	0.000 (0.000)
g_Pelistega	0	0	0.00105335	0.00442793	0.000 (0.000)	0.000 (0.000)	0.000 (0.000)	0.000 (0.000)	0.000 (0.000)	0.000 (0.000)
g_Phragmitibacter	0	0	0.000456489	0.00314277	0.000 (0.000)	0.000 (0.000)	0.000 (0.000)	0.000 (0.000)	0.000 (0.000)	0.000 (0.000)
g_Prevotellaceae YAB2003 group	0	0	2.66667e-05	0.000596285	0.000 (0.000)	0.000 (0.000)	0.000 (0.000)	0.000 (0.000)	0.000 (0.000)	0.000 (0.000)
g_Propionigenium	0	0	0.0146859	0.0264504	0.000 (0.000)	0.000 (0.000)	0.000 (0.000)	0.000 (0.000)	0.000 (0.000)	0.000 (0.000)
g_Pseudoclostridium	0	0	0.000180667	0.00164238	0.000 (0.000)	0.000 (0.000)	0.000 (0.000)	0.000 (0.000)	0.000 (0.000)	0.000 (0.000)
g_Pseudoscardovia	0	0	0.000283572	0.00220103	0.000 (0.000)	0.000 (0.000)	0.000 (0.000)	0.000 (0.000)	0.000 (0.000)	0.000 (0.000)
g_Psittacicella	0	0	0.0193009	0.0277529	0.000 (0.000)	0.000 (0.000)	0.000 (0.000)	0.000 (0.000)	0.000 (0.000)	0.000 (0.000)
g_Psychrilyobacter	0	0	0.51273	0.289667	0.000 (0.000)	0.000 (0.000)	0.000 (0.000)	0.000 (0.000)	0.000 (0.000)	0.000 (0.000)
g_Pygmaiobacter	0	0	0.00283879	0.00828392	0.000 (0.000)	0.000 (0.000)	0.000 (0.000)	0.000 (0.000)	0.000 (0.000)	0.000 (0.000)
g_Quinella	0	0	0.0999104	0.0767157	0.000 (0.000)	0.000 (0.000)	0.000 (0.000)	0.000 (0.000)	0.000 (0.000)	0.000 (0.000)
g_Raineyella	0	0	0.00044313	0.00250386	0.000 (0.000)	0.000 (0.000)	0.000 (0.000)	0.000 (0.000)	0.000 (0.000)	0.000 (0.000)
g_Schnuerera	0	0	0.0844142	0.0682867	0.000 (0.000)	0.000 (0.000)	0.000 (0.000)	0.000 (0.000)	0.000 (0.000)	0.000 (0.000)
g_Secundilactobacillus	0	0	0.000340302	0.00231805	0.000 (0.000)	0.000 (0.000)	0.000 (0.000)	0.000 (0.000)	0.000 (0.000)	0.000 (0.000)
g_Sediminispirochaeta	0	0	0.000191111	0.00154812	0.000 (0.000)	0.000 (0.000)	0.000 (0.000)	0.000 (0.000)	0.000 (0.000)	0.000 (0.000)
g_Shimwellia	0	0	0	0	0.000 (0.000)	0.000 (0.000)	0.000 (0.000)	0.000 (0.000)	0.000 (0.000)	0.000 (0.000)
g_Sinomonas	0	0	0.000210808	0.00180237	0.000 (0.000)	0.000 (0.000)	0.000 (0.000)	0.000 (0.000)	0.000 (0.000)	0.000 (0.000)
g_Soehngenia	0	0	0.000721746	0.00437637	0.000 (0.000)	0.000 (0.000)	0.000 (0.000)	0.000 (0.000)	0.000 (0.000)	0.000 (0.000)
g_Spiroplasma	0	0	0.0290814	0.0333028	0.000 (0.000)	0.000 (0.000)	0.000 (0.000)	0.000 (0.000)	0.000 (0.000)	0.000 (0.000)
g_Stenoxybacter	0	0	7.33333e-05	0.000952653	0.000 (0.000)	0.000 (0.000)	0.000 (0.000)	0.000 (0.000)	0.000 (0.000)	0.000 (0.000)
g_Syntrophococcus	0	0	0.00277522	0.00887995	0.000 (0.000)	0.000 (0.000)	0.000 (0.000)	0.000 (0.000)	0.000 (0.000)	0.000 (0.000)
g_Teretinema	0	0	0.00125989	0.00590943	0.000 (0.000)	0.000 (0.000)	0.000 (0.000)	0.000 (0.000)	0.000 (0.000)	0.000 (0.000)
g_Thermoclostridium	0	0	0.00305414	0.00847596	0.000 (0.000)	0.000 (0.000)	0.000 (0.000)	0.000 (0.000)	0.000 (0.000)	0.000 (0.000)
g_U29-B03	0	0	0.00043906	0.00270534	0.000 (0.000)	0.000 (0.000)	0.000 (0.000)	0.000 (0.000)	0.000 (0.000)	0.000 (0.000)
g_UCG-007	0	0	0.000266667	0.00250219	0.000 (0.000)	0.000 (0.000)	0.000 (0.000)	0.000 (0.000)	0.000 (0.000)	0.000 (0.000)
g_Zhihengliuella	0	0	0.000534173	0.00340134	0.000 (0.000)	0.000 (0.000)	0.000 (0.000)	0.000 (0.000)	0.000 (0.000)	0.000 (0.000)
g_[Clostridium] methylpentosum group	0	0	0.00140595	0.00622308	0.000 (0.000)	0.000 (0.000)	0.000 (0.000)	0.000 (0.000)	0.000 (0.000)	0.000 (0.000)
g_endosymbionts	0	0	0.00142333	0.00542756	0.000 (0.000)	0.000 (0.000)	0.000 (0.000)	0.000 (0.000)	0.000 (0.000)	0.000 (0.000)
g_hoa5-07d05 gut group	0	0	0.0012614	0.00530101	0.000 (0.000)	0.000 (0.000)	0.000 (0.000)	0.000 (0.000)	0.000 (0.000)	0.000 (0.000)
g_Jeotgalicoccus	-0.000827652	0.973907	0.840113	0.208994	0.065 (0.829)	0.109 (0.941)	-0.053 (0.756)	0.380 (0.653)	-0.704 (0.949)	0.254 (0.972)
g_Butyricicoccus	-0.00201008	0.0779019	0.00164528	0.00752004	0.000 (0.000)	0.000 (0.000)	0.002 (0.045)	0.000 (0.000)	-0.004 (0.064)	0.000 (0.000)
g_Advenella	-0.00201008	0.0449467	0.00182612	0.00589389	0.000 (0.000)	0.000 (0.000)	0.000 (0.000)	0.000 (0.000)	-0.002 (0.045)	0.000 (0.000)
g_Angelakisella	-0.00201008	0.0449467	0.00188902	0.00667633	0.000 (0.000)	0.000 (0.000)	0.000 (0.000)	0.000 (0.000)	-0.002 (0.045)	0.000 (0.000)
g_Cedecea	-0.00201008	0.0779019	0.00508748	0.0106034	0.000 (0.000)	0.002 (0.045)	0.000 (0.000)	0.000 (0.000)	-0.004 (0.064)	0.000 (0.000)
g_Erysipelotrichaceae UCG-007	-0.00201008	0.0449467	0.000483965	0.00329475	0.000 (0.000)	0.000 (0.000)	0.000 (0.000)	0.000 (0.000)	-0.002 (0.045)	0.000 (0.000)
g_Falcatimonas	-0.00201008	0.0449467	0.00202026	0.00705466	0.000 (0.000)	0.000 (0.000)	0.000 (0.000)	0.000 (0.000)	0.000 (0.000)	-0.002 (0.045)
g_Falsarthrobacter	-0.00201008	0.0449467	0.00535724	0.0132608	0.000 (0.000)	0.000 (0.000)	0.000 (0.000)	0.000 (0.000)	-0.002 (0.045)	0.000 (0.000)
g_Schwartzia	-0.00201008	0.0449467	0.00145864	0.00549057	-0.002 (0.045)	0.000 (0.000)	0.000 (0.000)	0.000 (0.000)	0.000 (0.000)	0.000 (0.000)
g_Turicimonas	-0.00201008	0.0449467	0.00498507	0.0111336	0.000 (0.000)	0.000 (0.000)	0.000 (0.000)	0.000 (0.000)	-0.002 (0.045)	0.000 (0.000)
g_UC5-1-2E3	-0.00201008	0.0449467	0.000764054	0.00513387	0.000 (0.000)	0.000 (0.000)	0.000 (0.000)	0.000 (0.000)	-0.002 (0.045)	0.000 (0.000)
f_Coriobacteriales Incertae Sedis	-0.00349236	0.414699	0.0471953	0.0468449	0.000 (0.000)	0.004 (0.156)	0.045 (0.243)	0.000 (0.000)	-0.047 (0.320)	-0.002 (0.101)
g_Lactonifactor	-0.00401342	0.0633942	0.00203553	0.00743039	0.000 (0.000)	0.000 (0.000)	0.000 (0.000)	0.000 (0.000)	-0.004 (0.063)	0.000 (0.000)
g_Sharpea	-0.00401342	0.0898183	0.00559807	0.0128928	0.000 (0.000)	0.002 (0.045)	0.000 (0.000)	0.000 (0.000)	-0.006 (0.078)	0.000 (0.000)
g_Cetobacterium	-0.00402015	0.0635004	0.00182672	0.00705827	0.000 (0.000)	-0.004 (0.064)	0.000 (0.000)	0.000 (0.000)	0.000 (0.000)	0.000 (0.000)
g_Glaesserella	-0.00402015	0.0635004	0.000551748	0.00360001	0.000 (0.000)	0.000 (0.000)	0.000 (0.000)	0.000 (0.000)	-0.004 (0.064)	0.000 (0.000)
g_Herbinix	-0.00402015	0.0635004	0.00128654	0.00500119	0.000 (0.000)	0.000 (0.000)	0.000 (0.000)	0.000 (0.000)	-0.004 (0.064)	0.000 (0.000)
g_Mariniluteicoccus	-0.00402015	0.110133	0.0200566	0.0260026	0.000 (0.000)	0.004 (0.064)	0.000 (0.000)	0.000 (0.000)	-0.008 (0.090)	0.000 (0.000)
g_Pseudocitrobacter	-0.00402015	0.0635004	0.00195078	0.00634655	0.000 (0.000)	0.000 (0.000)	0.000 (0.000)	0.000 (0.000)	-0.002 (0.045)	-0.002 (0.045)
g_Rikenella	-0.00402015	0.0635004	0.00524348	0.0120759	0.000 (0.000)	0.000 (0.000)	0.000 (0.000)	0.000 (0.000)	-0.004 (0.064)	0.000 (0.000)
g_Frisingicoccus	-0.00487368	0.250509	0.0118516	0.0188332	0.002 (0.045)	-0.013 (0.149)	-0.004 (0.090)	0.000 (0.000)	-0.000 (0.127)	0.010 (0.119)
g_Candidatus Soleaferrea	-0.00508927	0.760336	0.0787178	0.0537532	-0.013 (0.633)	-0.004 (0.142)	0.006 (0.078)	0.000 (0.064)	-0.030 (0.372)	0.038 (0.440)
g_Hydrogenoanaerobacterium	-0.00602349	0.233677	0.0090716	0.0154779	0.000 (0.000)	0.006 (0.135)	0.000 (0.000)	0.000 (0.000)	-0.016 (0.179)	0.004 (0.064)
g_Coprobacter	-0.00603023	0.0776937	0.00232176	0.00718444	0.000 (0.000)	0.000 (0.000)	0.000 (0.000)	0.000 (0.000)	-0.002 (0.045)	-0.004 (0.064)
f_Eubacteriaceae	-0.00603023	0.100423	0.00581165	0.0123164	0.000 (0.000)	0.002 (0.045)	0.000 (0.000)	0.000 (0.000)	-0.008 (0.090)	0.000 (0.000)
g_Petrimonas	-0.00603696	0.100355	0.00188564	0.00789691	0.000 (0.000)	0.000 (0.000)	0.000 (0.000)	0.000 (0.000)	-0.006 (0.100)	0.000 (0.000)
g_Castellaniella	-0.00687852	0.298408	0.024066	0.0281845	0.000 (0.000)	0.000 (0.000)	0.000 (0.000)	0.000 (0.000)	-0.002 (0.078)	-0.005 (0.288)
g_Propionicimonas	-0.00802183	0.210845	0.0714421	0.0554598	0.000 (0.000)	-0.002 (0.045)	0.000 (0.000)	0.000 (0.000)	-0.028 (0.166)	0.020 (0.141)
g_A2	-0.00803357	0.0895477	0.0008454	0.00428867	0.000 (0.000)	0.000 (0.000)	0.000 (0.000)	0.000 (0.000)	-0.008 (0.090)	0.000 (0.000)
g_Lachnospiraceae XPB1014 group	-0.0080403	0.0896227	0.0143781	0.024329	0.000 (0.000)	0.000 (0.000)	0.000 (0.000)	0.000 (0.000)	-0.008 (0.090)	0.000 (0.000)
g_[Eubacterium] oxidoreducens group	-0.0080403	0.0896227	0.00413965	0.0091936	0.000 (0.000)	0.000 (0.000)	0.000 (0.000)	0.000 (0.000)	0.000 (0.000)	-0.008 (0.090)
g_Kosakonia	-0.00828242	0.445919	0.0451197	0.0445793	0.000 (0.000)	0.056 (0.238)	-0.006 (0.078)	0.000 (0.000)	0.002 (0.234)	-0.062 (0.347)
g_Erysipelotrichaceae UCG-009	-0.0100436	0.100033	0.00242165	0.00813694	0.000 (0.000)	0.000 (0.000)	0.000 (0.000)	0.000 (0.000)	-0.008 (0.090)	-0.002 (0.045)
g_Raoultibacter	-0.0100436	0.13455	0.00432876	0.00996364	0.000 (0.000)	0.002 (0.045)	0.000 (0.000)	0.000 (0.000)	-0.012 (0.127)	0.000 (0.000)
g_Faecalitalea	-0.0100504	0.1346	0.00861598	0.0153413	0.000 (0.090)	0.000 (0.000)	0.000 (0.000)	0.000 (0.000)	-0.010 (0.100)	0.000 (0.000)
g_Asteroleplasma	-0.0111919	0.185205	0.0179859	0.0245225	0.000 (0.000)	0.009 (0.135)	0.000 (0.000)	0.000 (0.000)	-0.020 (0.141)	0.000 (0.000)
g_Buchananella	-0.0133786	0.698995	0.107141	0.0758884	0.000 (0.000)	-0.027 (0.342)	0.006 (0.078)	-0.002 (0.045)	0.013 (0.615)	-0.010 (0.135)
g_Lachnospiraceae NK3A20 group	-0.0156458	0.391244	0.037084	0.0390988	0.002 (0.045)	-0.004 (0.064)	0.020 (0.141)	0.000 (0.000)	-0.012 (0.229)	-0.018 (0.298)
f_Porphyromonadaceae	-0.0160806	0.253948	0.0099815	0.0162644	0.000 (0.000)	0.000 (0.000)	0.000 (0.000)	0.000 (0.000)	-0.030 (0.223)	0.014 (0.118)
g_Absiella	-0.0169073	0.161335	0.0187528	0.0258189	0.000 (0.000)	0.000 (0.000)	0.000 (0.000)	0.000 (0.000)	-0.019 (0.155)	0.002 (0.045)
g_Phoenicibacter	-0.0169569	0.142615	0.0114719	0.0181042	0.000 (0.000)	0.000 (0.000)	0.000 (0.000)	0.000 (0.000)	-0.014 (0.118)	-0.002 (0.101)
g_Muribaculum	-0.0180772	0.205316	0.00782149	0.017037	0.000 (0.000)	0.010 (0.100)	0.000 (0.000)	0.000 (0.000)	-0.020 (0.141)	-0.008 (0.127)
g_Adlercreutzia	-0.0196119	1.10657	0.257224	0.137556	-0.030 (0.183)	0.023 (0.345)	0.046 (1.024)	0.000 (0.000)	-0.054 (0.313)	-0.093 (0.864)
g_CAG-873	-0.0209218	0.39435	0.0214765	0.032736	0.000 (0.000)	0.000 (0.000)	0.000 (0.000)	0.000 (0.000)	-0.069 (0.338)	0.056 (0.231)
g_Prosthecobacter	-0.0272163	0.832648	0.116586	0.0652447	0.206 (0.502)	0.038 (0.422)	-0.002 (0.119)	0.000 (0.000)	-0.242 (0.597)	-0.002 (0.281)
g_GCA-900066575	-0.0287338	0.374824	0.0732839	0.0596568	0.000 (0.000)	-0.000 (0.110)	-0.006 (0.078)	0.000 (0.000)	-0.021 (0.341)	0.000 (0.110)
g_Roseimicrobium	-0.0289747	0.213848	0.00726915	0.0143204	0.000 (0.000)	0.002 (0.045)	0.002 (0.045)	0.000 (0.000)	-0.014 (0.148)	-0.019 (0.141)
g_Lachnospiraceae NC2004 group	-0.0289824	0.256745	0.0150748	0.0206324	0.002 (0.045)	-0.002 (0.078)	0.014 (0.118)	0.000 (0.000)	-0.041 (0.212)	0.000 (0.000)
f_Coriobacteriaceae	-0.0305561	0.413172	0.0281908	0.0344283	0.000 (0.000)	-0.031 (0.405)	0.000 (0.000)	0.000 (0.000)	-0.002 (0.045)	0.002 (0.078)
g_Acetatifactor	-0.0319636	0.322291	0.0104572	0.016302	0.000 (0.000)	0.006 (0.078)	-0.006 (0.078)	0.000 (0.000)	-0.033 (0.303)	0.000 (0.000)
g_Cavicella	-0.0330015	0.222582	0.0207225	0.0296105	0.000 (0.000)	0.000 (0.000)	0.000 (0.000)	0.000 (0.000)	-0.039 (0.207)	0.006 (0.078)
g_[Eubacterium] eligens group	-0.0337625	1.12619	0.370867	0.150958	0.007 (0.327)	0.486 (0.943)	0.014 (0.233)	0.004 (0.064)	-0.758 (0.880)	0.134 (0.824)
g_Pseudoglutamicibacter	-0.0366748	1.22123	1.14573	0.361337	0.033 (0.421)	1.074 (1.112)	-0.163 (0.676)	0.014 (0.118)	-0.846 (1.135)	-0.021 (0.825)
g_Nesterenkonia	-0.0381725	1.10251	0.403139	0.132231	0.263 (0.804)	0.121 (0.873)	-0.117 (0.485)	-0.006 (0.100)	-0.754 (0.912)	0.473 (0.773)
g_Vitreoscilla	-0.0390268	0.216956	0.0231365	0.0295787	0.000 (0.000)	0.000 (0.000)	0.000 (0.000)	0.000 (0.000)	-0.039 (0.217)	0.000 (0.000)
g_Periweissella	-0.0420683	0.841836	0.193456	0.0941043	0.006 (0.078)	0.008 (0.090)	0.002 (0.045)	0.000 (0.000)	-0.432 (0.634)	0.389 (0.626)
g_UCG-003	-0.0435445	0.625704	0.0425422	0.0407201	0.013 (0.368)	-0.034 (0.527)	0.000 (0.000)	0.000 (0.000)	-0.023 (0.210)	0.008 (0.090)
g_Eubacterium	-0.0438931	0.318287	0.0213734	0.0288197	0.000 (0.000)	0.002 (0.045)	-0.042 (0.251)	0.000 (0.000)	-0.002 (0.045)	-0.002 (0.196)
g_UCG-009	-0.0465126	0.584065	0.0642143	0.0505927	0.002 (0.185)	0.012 (0.110)	0.000 (0.000)	0.002 (0.045)	-0.054 (0.455)	-0.006 (0.374)
g_Peptoclostridium	-0.0498278	0.947998	0.192988	0.0998865	0.001 (0.196)	0.041 (0.776)	0.012 (0.109)	0.001 (0.717)	-0.152 (0.598)	0.059 (0.438)
g_Aestuariimicrobium	-0.0532989	0.644855	0.119859	0.0728887	0.000 (0.000)	0.004 (0.064)	0.093 (0.307)	0.000 (0.000)	-0.100 (0.380)	-0.054 (0.463)
g_Caproiciproducens	-0.0570954	0.366676	0.0150016	0.0237213	0.000 (0.000)	-0.057 (0.361)	0.000 (0.000)	0.000 (0.000)	-0.002 (0.045)	0.002 (0.045)
g_Ruthenibacterium	-0.0571506	0.666463	0.0697455	0.0533908	-0.002 (0.045)	-0.000 (0.508)	-0.083 (0.418)	0.000 (0.000)	-0.043 (0.225)	0.066 (0.287)
g_Cellulosilyticum	-0.0595129	0.661805	0.157562	0.0936563	0.002 (0.045)	0.077 (0.405)	0.002 (0.045)	0.000 (0.000)	-0.154 (0.455)	0.019 (0.439)
g_Actinobaculum	-0.0631414	0.327903	0.035983	0.0358769	0.000 (0.000)	0.006 (0.078)	-0.002 (0.045)	0.000 (0.000)	-0.004 (0.064)	-0.065 (0.312)
g_Flaviflexus	-0.063226	0.928244	0.172277	0.101644	0.032 (0.236)	0.082 (0.825)	0.002 (0.078)	0.004 (0.064)	-0.157 (0.680)	0.016 (0.179)
g_Caecibacterium	-0.0640052	0.250555	0.0128943	0.0204575	0.000 (0.000)	-0.062 (0.247)	0.000 (0.000)	0.000 (0.000)	-0.004 (0.064)	0.000 (0.000)
g_Propionicicella	-0.0659788	0.261878	0.0391376	0.039405	0.000 (0.000)	0.000 (0.000)	0.000 (0.000)	0.000 (0.000)	-0.066 (0.262)	0.000 (0.000)
g_Fusicatenibacter	-0.0676458	1.00002	0.34998	0.123796	0.057 (0.618)	0.440 (0.831)	-0.001 (0.486)	-0.006 (0.119)	-0.454 (0.856)	-0.131 (0.748)
g_Propioniciclava	-0.067717	0.415288	0.0222601	0.0249758	0.000 (0.000)	0.010 (0.100)	0.000 (0.000)	0.000 (0.000)	-0.084 (0.392)	0.008 (0.090)
g_Breznakia	-0.0683224	0.30405	0.0102376	0.0172517	0.000 (0.000)	0.002 (0.045)	0.002 (0.045)	0.000 (0.000)	-0.078 (0.277)	0.006 (0.100)
g_Kallipyga	-0.0745904	0.676663	0.0608086	0.0482139	0.016 (0.210)	0.021 (0.376)	0.006 (0.119)	0.000 (0.000)	-0.234 (0.493)	0.138 (0.361)
g_Arsenophonus	-0.0788185	0.352389	0.0220496	0.0303197	-0.002 (0.045)	0.020 (0.141)	0.000 (0.000)	0.000 (0.000)	-0.096 (0.326)	0.000 (0.000)
f_Mycoplasmataceae	-0.0829312	0.283304	0.0107954	0.0178184	0.000 (0.000)	0.000 (0.000)	0.000 (0.000)	0.000 (0.000)	-0.083 (0.283)	0.000 (0.064)
g_Lachnospiraceae UCG-007	-0.0853739	0.368496	0.0287779	0.0358187	-0.004 (0.063)	0.000 (0.000)	0.000 (0.000)	0.000 (0.000)	0.000 (0.000)	-0.084 (0.367)
g_Ignavigranum	-0.0860955	0.583628	0.0616236	0.0444658	0.000 (0.064)	0.010 (0.174)	0.002 (0.045)	0.000 (0.000)	-0.180 (0.476)	0.087 (0.347)
g_Anaerostipes	-0.0961719	1.0253	0.760877	0.259905	0.063 (0.540)	0.466 (0.935)	-0.069 (0.581)	0.000 (0.110)	-0.718 (0.889)	0.050 (0.869)
g_Sellimonas	-0.0969246	0.427006	0.0236535	0.0285601	-0.004 (0.064)	0.008 (0.110)	0.000 (0.000)	0.004 (0.063)	-0.111 (0.391)	0.006 (0.100)
g_Micropruina	-0.0983231	0.366342	0.0163398	0.0230197	0.000 (0.000)	0.000 (0.000)	0.000 (0.000)	0.000 (0.000)	-0.106 (0.347)	0.008 (0.110)
g_Coprobacillus	-0.0997066	0.538729	0.0459016	0.0440363	0.000 (0.000)	-0.109 (0.504)	0.016 (0.126)	0.000 (0.000)	-0.008 (0.127)	0.002 (0.045)
g_Faucicola	-0.10009	0.837123	0.324183	0.157569	0.006 (0.162)	0.010 (0.100)	-0.002 (0.045)	-0.004 (0.064)	0.130 (0.421)	-0.218 (0.784)
g_Sporobacter	-0.100379	0.428859	0.0617906	0.0474032	0.000 (0.000)	-0.144 (0.380)	0.002 (0.045)	0.000 (0.000)	0.008 (0.090)	0.036 (0.198)
f_Streptococcaceae	-0.101243	1.09179	0.561822	0.221442	0.012 (0.109)	0.028 (0.331)	0.006 (0.149)	0.002 (0.045)	-0.438 (1.027)	0.316 (1.163)
g_Gardnerella	-0.101657	1.07359	1.534	0.323493	0.401 (0.889)	-0.226 (1.029)	-0.217 (0.923)	0.047 (0.375)	-1.412 (0.936)	1.134 (0.986)
g_Macellibacteroides	-0.103844	0.676772	0.100702	0.0689132	0.008 (0.156)	0.144 (0.371)	0.000 (0.000)	0.002 (0.045)	-0.254 (0.602)	-0.000 (0.110)
g_[Clostridium] innocuum group	-0.105667	0.439027	0.0376298	0.0365815	0.000 (0.000)	-0.002 (0.045)	-0.090 (0.357)	0.000 (0.000)	-0.018 (0.205)	-0.004 (0.254)
g_dgA-11 gut group	-0.108101	0.88793	0.131972	0.0843343	0.004 (0.064)	0.002 (0.101)	0.000 (0.000)	-0.006 (0.078)	-0.346 (0.787)	0.322 (0.573)
g_Tractidigestivibacter	-0.109362	0.50343	0.0399192	0.0378137	-0.012 (0.201)	-0.004 (0.238)	0.002 (0.045)	0.000 (0.000)	-0.012 (0.234)	-0.095 (0.381)
g_Acetobacterium	-0.11008	0.761333	0.127736	0.0759388	0.007 (0.110)	-0.008 (0.545)	-0.068 (0.387)	0.006 (0.100)	-0.112 (0.440)	0.028 (0.317)
g_Fructilactobacillus	-0.110584	0.724012	0.114057	0.0667841	-0.010 (0.119)	-0.002 (0.135)	0.006 (0.119)	0.000 (0.000)	-0.135 (0.533)	0.005 (0.616)
g_Propionispira	-0.112906	0.471052	0.0630095	0.0590028	0.000 (0.000)	0.000 (0.000)	-0.116 (0.469)	0.000 (0.000)	-0.004 (0.063)	0.006 (0.078)
g_Alkalibacterium	-0.112998	0.356869	0.0243933	0.031289	0.000 (0.000)	0.000 (0.064)	0.000 (0.000)	0.000 (0.000)	-0.113 (0.351)	0.000 (0.000)
g_Mitsuokella	-0.114392	0.411761	0.0251175	0.0281497	0.000 (0.064)	0.004 (0.064)	0.000 (0.000)	0.000 (0.000)	-0.130 (0.393)	0.012 (0.127)
g_Dubosiella	-0.114881	0.367094	0.0162858	0.0218328	0.000 (0.000)	-0.002 (0.045)	0.000 (0.000)	0.000 (0.000)	-0.111 (0.357)	-0.002 (0.078)
g_Robinsoniella	-0.117879	0.388061	0.0124307	0.0200079	0.000 (0.000)	0.000 (0.000)	0.000 (0.000)	0.000 (0.000)	-0.129 (0.384)	0.016 (0.126)
g_Corticicoccus	-0.118148	0.392442	0.049244	0.0472306	0.000 (0.000)	0.000 (0.000)	0.000 (0.000)	0.000 (0.000)	-0.118 (0.393)	-0.002 (0.045)
g_Propioniferax	-0.119173	0.428506	0.0332967	0.037413	0.002 (0.045)	-0.002 (0.045)	0.000 (0.000)	0.000 (0.000)	-0.123 (0.427)	0.002 (0.045)
g_Lachnospiraceae UCG-009	-0.119444	0.464851	0.0847637	0.0683729	0.002 (0.045)	-0.004 (0.064)	0.000 (0.000)	0.000 (0.000)	-0.117 (0.464)	0.000 (0.000)
g_Succiniclasticum	-0.122528	1.08724	0.316331	0.165357	-0.053 (0.228)	0.301 (1.002)	0.002 (0.045)	0.000 (0.000)	-0.538 (0.659)	-0.053 (0.439)
g_Catenibacterium	-0.124165	0.979058	0.289708	0.112886	-0.037 (0.279)	-0.080 (0.819)	-0.034 (0.519)	0.000 (0.000)	-0.483 (0.800)	0.429 (0.735)
g_Renibacterium	-0.126518	0.53902	0.0533937	0.0443096	-0.004 (0.090)	0.028 (0.166)	0.000 (0.000)	0.000 (0.000)	-0.199 (0.480)	0.055 (0.232)
g_Aerosphaera	-0.129616	1.10946	0.635528	0.194109	0.217 (0.665)	-0.279 (0.936)	0.203 (0.805)	0.006 (0.100)	-1.255 (0.807)	1.117 (0.701)
g_Chishuiella	-0.129641	0.819519	0.110344	0.0698992	0.175 (0.585)	-0.100 (0.424)	-0.168 (0.492)	0.000 (0.000)	-0.071 (0.378)	0.000 (0.064)
g_Specibacter	-0.132805	0.394924	0.0342991	0.0362759	0.000 (0.000)	0.000 (0.000)	0.000 (0.000)	0.000 (0.000)	-0.131 (0.364)	-0.006 (0.174)
g_Paraprevotella	-0.140829	1.09595	0.378457	0.18393	0.153 (0.574)	0.313 (1.029)	-0.004 (0.168)	0.000 (0.000)	-0.701 (0.783)	-0.009 (0.593)
g_Scardovia	-0.145673	1.00869	0.88219	0.213558	0.077 (0.739)	0.331 (0.915)	-0.172 (0.961)	0.004 (0.142)	-0.422 (0.997)	-0.081 (0.956)
g_Buttiauxella	-0.146411	0.752388	0.0943282	0.0655649	0.000 (0.000)	-0.051 (0.342)	0.000 (0.000)	0.000 (0.000)	-0.131 (0.672)	0.014 (0.313)
g_[Eubacterium] xylanophilum group	-0.147783	0.755271	0.0844793	0.0635434	0.002 (0.045)	0.007 (0.135)	0.010 (0.234)	0.000 (0.000)	-0.337 (0.612)	0.172 (0.424)
g_Holdemania	-0.148141	0.464528	0.0352444	0.038679	0.000 (0.000)	-0.131 (0.445)	0.000 (0.000)	0.000 (0.000)	-0.022 (0.148)	0.000 (0.000)
g_Eisenbergiella	-0.152174	0.612988	0.0632736	0.0483761	0.004 (0.064)	-0.010 (0.206)	0.000 (0.110)	0.000 (0.000)	-0.132 (0.584)	-0.016 (0.237)
g_[Ruminococcus] gauvreauii group	-0.15238	0.818824	0.11075	0.0645567	0.022 (0.224)	0.091 (0.365)	0.004 (0.090)	0.002 (0.045)	-0.240 (0.692)	-0.008 (0.520)
g_Auritidibacter	-0.156751	0.614086	0.0569817	0.0501342	0.039 (0.329)	-0.042 (0.289)	-0.125 (0.414)	0.000 (0.000)	-0.058 (0.303)	0.006 (0.100)
g_Erysipelotrichaceae UCG-003	-0.157285	0.945303	0.181553	0.0768459	0.164 (0.598)	0.120 (0.578)	0.008 (0.168)	-0.004 (0.090)	-0.450 (0.760)	-0.009 (0.450)
f_Butyricicoccaceae	-0.165296	0.510647	0.0857408	0.0637402	0.004 (0.063)	0.006 (0.078)	-0.002 (0.045)	0.000 (0.000)	-0.188 (0.484)	0.016 (0.179)
g_UCG-008	-0.168235	0.426078	0.0251568	0.0289659	0.000 (0.000)	0.000 (0.000)	-0.004 (0.063)	0.000 (0.000)	-0.173 (0.416)	0.008 (0.110)
g_Lactiplantibacillus	-0.168493	1.15081	0.738307	0.25667	0.510 (0.992)	0.129 (0.667)	-0.064 (0.352)	0.018 (0.134)	-0.849 (0.953)	-0.030 (0.856)
g_Ornithobacterium	-0.172158	0.78272	0.0928404	0.0713979	-0.008 (0.090)	-0.154 (0.775)	0.000 (0.000)	0.000 (0.000)	-0.016 (0.141)	0.000 (0.000)
g_Lelliottia	-0.175051	0.527802	0.0420575	0.0404218	0.000 (0.000)	0.002 (0.045)	0.002 (0.045)	-0.002 (0.045)	-0.024 (0.253)	-0.158 (0.495)
g_Berryella	-0.175113	1.06192	0.222418	0.121594	-0.014 (0.134)	0.016 (0.126)	-0.203 (1.051)	0.002 (0.045)	0.002 (0.333)	-0.006 (0.452)
g_Elizabethkingia	-0.178254	0.516268	0.0365006	0.0346589	-0.002 (0.045)	0.004 (0.064)	0.000 (0.000)	0.000 (0.000)	-0.187 (0.443)	0.005 (0.292)
g_Arcanobacterium	-0.179488	0.974344	0.239156	0.107559	0.002 (0.300)	0.151 (0.516)	-0.056 (0.865)	0.004 (0.064)	-0.448 (0.845)	0.153 (0.598)
g_Auricoccus-Abyssicoccus	-0.183228	1.09453	0.475066	0.151156	0.509 (0.717)	0.267 (0.818)	-0.297 (0.752)	-0.001 (0.216)	-0.937 (0.898)	0.199 (0.679)
g_Xylanibacter	-0.184094	1.05296	0.412767	0.142986	-0.003 (0.238)	0.105 (0.761)	0.623 (0.723)	0.002 (0.045)	-0.913 (0.902)	0.259 (0.545)
g_Oceanivirga	-0.187411	1.03028	0.502081	0.162306	0.088 (0.988)	0.086 (0.375)	0.074 (0.428)	0.019 (0.417)	-0.052 (0.850)	-0.575 (0.831)
g_Pseudoprevotella	-0.197716	1.01412	0.252365	0.114238	-0.008 (0.142)	-0.205 (0.793)	0.006 (0.100)	0.002 (0.045)	-0.168 (0.881)	0.180 (0.660)
g_Alloiococcus	-0.199222	1.09421	1.9109	0.333516	-0.620 (1.073)	0.402 (1.066)	-0.299 (0.993)	-0.200 (0.813)	-0.033 (1.024)	-0.004 (1.016)
g_Lachnospiraceae UCG-006	-0.200905	0.534291	0.055897	0.0501529	0.000 (0.000)	-0.004 (0.064)	0.000 (0.000)	0.000 (0.000)	-0.234 (0.488)	0.036 (0.187)
g_Enterobacter	-0.210617	1.07014	0.629664	0.201397	-0.062 (0.372)	0.018 (0.443)	0.126 (0.566)	0.014 (0.134)	-0.219 (1.026)	-0.012 (1.003)
f_Clostridiaceae	-0.210932	1.06063	0.813442	0.238758	0.205 (0.701)	0.367 (0.790)	-0.322 (0.927)	0.029 (0.348)	-0.794 (0.929)	0.337 (1.019)
g_Acidaminococcus	-0.222198	0.812849	0.132604	0.0735702	0.004 (0.063)	-0.120 (0.522)	0.010 (0.119)	0.000 (0.000)	-0.137 (0.523)	-0.021 (0.579)
g_Roseburia	-0.22327	1.02788	0.502675	0.177942	0.265 (0.812)	0.061 (0.776)	-0.390 (0.931)	0.002 (0.045)	-0.443 (0.921)	0.222 (0.815)
g_Massiliomicrobiota	-0.225572	0.671691	0.0657075	0.0506122	-0.010 (0.149)	-0.013 (0.348)	0.024 (0.167)	0.000 (0.000)	-0.220 (0.577)	-0.020 (0.155)
g_Marvinbryantia	-0.233629	0.781356	0.081953	0.0549329	-0.008 (0.110)	0.077 (0.358)	-0.079 (0.429)	0.000 (0.000)	-0.265 (0.652)	0.010 (0.162)
g_Shuttleworthia	-0.233725	1.031	0.505999	0.182951	-0.023 (0.366)	0.411 (0.669)	-0.217 (0.646)	0.008 (0.090)	-0.668 (0.938)	0.095 (0.924)
g_Conservatibacter	-0.234875	0.860815	0.0956604	0.0630663	0.010 (0.100)	-0.002 (0.045)	0.024 (0.627)	0.002 (0.045)	0.184 (0.528)	-0.427 (0.749)
g_Mycoplasmopsis	-0.242285	1.02654	0.494012	0.204321	0.038 (0.192)	-0.143 (0.618)	0.002 (0.078)	0.000 (0.064)	-0.412 (0.854)	0.178 (0.862)
g_Proteocatella	-0.242638	1.252	0.268953	0.149899	0.000 (0.000)	0.459 (0.588)	-0.596 (1.217)	0.000 (0.000)	-0.016 (0.141)	-0.012 (0.110)
g_Weeksella	-0.242873	0.648145	0.0869383	0.059951	-0.002 (0.078)	-0.152 (0.397)	0.000 (0.000)	0.002 (0.045)	-0.125 (0.437)	0.014 (0.415)
g_ASF356	-0.251258	0.490889	0.0269785	0.0318652	0.000 (0.000)	0.004 (0.090)	0.002 (0.045)	0.000 (0.000)	-0.257 (0.490)	0.000 (0.000)
g_Olsenella	-0.257736	1.10703	0.738308	0.201831	-0.014 (0.599)	0.687 (0.844)	-0.361 (0.897)	0.018 (0.134)	-0.585 (0.997)	-0.306 (1.027)
g_Lentilactobacillus	-0.260997	0.765667	0.129074	0.0886909	0.000 (0.064)	-0.018 (0.215)	0.000 (0.090)	0.000 (0.000)	-0.241 (0.745)	-0.025 (0.232)
g_Paenalcaligenes	-0.264393	0.643159	0.15859	0.0934735	0.002 (0.045)	-0.212 (0.602)	0.000 (0.000)	0.000 (0.000)	-0.076 (0.322)	0.008 (0.090)
g_Acutalibacter	-0.264642	1.01996	0.366193	0.140205	0.047 (0.315)	0.267 (0.697)	-0.077 (0.753)	0.005 (0.076)	-0.761 (0.923)	0.350 (0.729)
g_Schleiferilactobacillus	-0.273033	0.58375	0.0513887	0.0461044	0.000 (0.000)	0.014 (0.149)	0.002 (0.045)	0.000 (0.000)	-0.290 (0.563)	0.002 (0.101)
g_Allobaculum	-0.282808	0.52764	0.0472867	0.0469002	0.000 (0.000)	0.000 (0.064)	0.000 (0.000)	0.000 (0.000)	-0.288 (0.519)	0.004 (0.090)
g_Senegalimassilia	-0.283495	0.859176	0.148662	0.0868105	-0.021 (0.241)	0.073 (0.560)	0.006 (0.078)	0.000 (0.000)	-0.383 (0.757)	0.035 (0.227)
g_Fastidiosipila	-0.285957	1.01358	0.327346	0.113859	0.046 (0.503)	-0.139 (0.724)	-0.137 (0.839)	0.012 (0.127)	-0.423 (0.809)	0.127 (0.684)
g_Pusillimonas	-0.289367	0.623863	0.163852	0.103002	0.002 (0.045)	0.002 (0.045)	-0.004 (0.090)	0.000 (0.000)	-0.281 (0.615)	-0.016 (0.126)
g_Arachnia	-0.291407	0.900855	0.216352	0.100213	0.010 (0.100)	-0.022 (0.528)	-0.117 (0.486)	0.004 (0.064)	-0.215 (0.778)	-0.022 (0.426)
g_Dellaglioa	-0.294326	1.28555	1.06415	0.372602	0.073 (0.264)	0.272 (0.794)	-0.268 (1.289)	0.008 (0.089)	-0.121 (1.160)	-0.177 (0.845)
g_Faecalibacter	-0.296492	0.804177	0.146884	0.093495	0.000 (0.000)	-0.116 (0.539)	0.207 (0.472)	0.000 (0.000)	-0.390 (0.648)	0.014 (0.149)
g_Oscillospira	-0.296566	0.5533	0.043332	0.0432248	0.000 (0.000)	-0.002 (0.119)	0.000 (0.000)	0.000 (0.000)	-0.294 (0.543)	-0.002 (0.078)
g_Fenollaria	-0.298805	1.19644	2.04639	0.43829	0.014 (0.953)	0.740 (1.201)	-0.027 (0.805)	0.024 (0.298)	-2.085 (0.884)	1.113 (0.928)
g_Cruoricaptor	-0.301749	0.577395	0.0629102	0.0544788	0.000 (0.000)	-0.100 (0.312)	0.002 (0.045)	0.000 (0.000)	-0.224 (0.533)	0.002 (0.045)
g_Facklamia	-0.311433	1.03797	0.845674	0.218555	-0.057 (0.692)	-0.224 (1.010)	-0.698 (0.903)	0.006 (0.149)	-0.454 (1.000)	0.820 (0.778)
g_Enteractinococcus	-0.316833	0.906922	0.205427	0.106503	0.071 (0.260)	0.235 (0.543)	-0.008 (0.090)	0.002 (0.045)	-0.589 (0.790)	0.056 (0.337)
f_Atopobiaceae	-0.31739	0.921715	0.202537	0.0868357	0.009 (0.234)	-0.061 (0.507)	0.042 (0.292)	-0.006 (0.078)	-0.436 (0.809)	0.108 (0.671)
g_Zag_111	-0.318089	0.914429	0.167979	0.089138	-0.019 (0.210)	0.006 (0.162)	0.000 (0.090)	0.000 (0.000)	-0.441 (0.868)	0.182 (0.526)
g_Gleimia	-0.320106	1.03537	0.445074	0.195274	0.048 (0.240)	0.295 (0.619)	-0.835 (0.930)	0.002 (0.045)	0.164 (1.039)	0.021 (0.676)
g_Eggerthella	-0.320852	1.06861	0.376896	0.166861	0.014 (0.118)	0.220 (0.968)	0.065 (0.321)	0.000 (0.000)	-0.810 (0.841)	-0.035 (0.490)
g_Pseudoramibacter	-0.324516	0.939896	0.212096	0.104124	0.006 (0.078)	0.105 (0.496)	0.092 (0.441)	0.000 (0.000)	0.109 (0.532)	-0.585 (0.802)
g_AAP99	-0.328289	0.641369	0.062937	0.0494589	-0.004 (0.064)	0.002 (0.119)	0.000 (0.000)	0.000 (0.000)	-0.145 (0.478)	-0.199 (0.501)
g_Enorma	-0.328606	0.662995	0.0639409	0.0578073	0.000 (0.000)	-0.176 (0.413)	-0.177 (0.591)	0.000 (0.000)	-0.002 (0.045)	0.002 (0.078)
g_Frederiksenia	-0.329892	0.645506	0.0632539	0.0533625	0.002 (0.119)	0.002 (0.216)	0.006 (0.078)	0.000 (0.000)	-0.362 (0.592)	0.006 (0.162)
g_Perlucidibaca	-0.339277	0.999347	0.266117	0.108349	-0.002 (0.101)	-0.006 (0.676)	0.070 (0.674)	0.000 (0.000)	-0.502 (0.732)	-0.055 (0.513)
g_Leyella	-0.341113	0.964258	0.182448	0.0841565	0.213 (0.547)	-0.136 (0.667)	-0.223 (0.682)	0.000 (0.000)	-0.373 (0.662)	0.070 (0.383)
g_CAG-56	-0.353569	0.929706	0.148924	0.083767	0.004 (0.090)	-0.228 (0.827)	0.004 (0.064)	0.002 (0.045)	-0.346 (0.677)	0.121 (0.464)
g_Tepidimicrobium	-0.354228	0.596844	0.0595262	0.0558951	0.000 (0.000)	0.000 (0.064)	-0.002 (0.045)	0.000 (0.000)	-0.355 (0.596)	0.000 (0.000)
g_Caviibacter	-0.360821	0.695328	0.0983412	0.0747978	0.006 (0.078)	0.004 (0.064)	-0.002 (0.078)	0.000 (0.000)	-0.377 (0.682)	0.002 (0.327)
g_[Bacteroides] pectinophilus group	-0.363175	0.562986	0.0602667	0.0538077	0.002 (0.045)	-0.000 (0.064)	0.000 (0.000)	0.000 (0.000)	-0.367 (0.557)	0.000 (0.000)
g_Glutamicibacter	-0.365123	1.09136	0.610602	0.166476	0.115 (0.740)	0.034 (0.996)	0.055 (0.536)	0.023 (0.190)	-1.029 (0.880)	0.379 (0.892)
g_Longibaculum	-0.365814	0.614602	0.0523652	0.044447	0.000 (0.000)	0.000 (0.000)	-0.016 (0.155)	0.000 (0.000)	-0.367 (0.598)	0.014 (0.118)
g_Eggerthia	-0.367147	0.717011	0.059419	0.0429291	0.000 (0.000)	0.009 (0.216)	0.004 (0.063)	0.000 (0.000)	-0.085 (0.429)	-0.325 (0.647)
g_Cryptobacterium	-0.37531	0.735661	0.0823285	0.0544843	-0.004 (0.168)	0.008 (0.211)	-0.010 (0.185)	0.000 (0.000)	-0.097 (0.506)	-0.320 (0.602)
g_Epulopiscium	-0.379837	0.559285	0.0380095	0.0446647	0.000 (0.000)	0.000 (0.000)	0.000 (0.000)	0.000 (0.000)	-0.379 (0.558)	0.000 (0.064)
g_Fannyhessea	-0.386272	0.987882	0.54849	0.162139	0.032 (0.439)	0.517 (0.841)	-0.270 (0.837)	0.038 (0.192)	-0.871 (0.877)	0.197 (0.779)
g_Anaerorhabdus	-0.396132	0.691446	0.0895914	0.0605417	0.000 (0.000)	-0.006 (0.078)	0.004 (0.064)	0.000 (0.000)	-0.440 (0.671)	0.046 (0.246)
g_HT002	-0.398879	1.07285	0.511832	0.165557	-0.003 (0.468)	0.527 (0.969)	-0.051 (0.530)	0.004 (0.063)	-0.690 (0.952)	-0.596 (0.808)
g_Tissierella	-0.399108	0.850657	0.165586	0.0969637	-0.006 (0.100)	-0.027 (0.404)	-0.113 (0.486)	0.000 (0.000)	-0.292 (0.768)	-0.027 (0.333)
g_Thomasclavelia	-0.403689	0.94057	0.18675	0.0960636	-0.008 (0.156)	-0.020 (0.167)	-0.010 (0.134)	0.000 (0.000)	-0.694 (0.815)	0.356 (0.648)
g_Anaerotruncus	-0.40574	0.635921	0.0612283	0.0519791	0.002 (0.045)	0.032 (0.236)	0.000 (0.000)	0.000 (0.000)	-0.437 (0.597)	0.000 (0.127)
g_Anaerocolumna	-0.407316	0.764892	0.137285	0.0827094	0.006 (0.119)	0.000 (0.000)	0.057 (0.283)	0.000 (0.000)	-0.535 (0.686)	0.083 (0.304)
g_Wolinella	-0.410853	0.76674	0.0725343	0.0650905	0.000 (0.000)	-0.402 (0.766)	0.000 (0.000)	0.000 (0.000)	-0.016 (0.141)	-0.004 (0.064)
g_Moheibacter	-0.413939	1.06106	0.42744	0.188392	0.020 (0.141)	0.018 (0.161)	-0.043 (0.954)	0.000 (0.000)	-0.471 (0.977)	0.113 (0.409)
g_W5053	-0.429662	0.992303	0.269956	0.108055	-0.054 (0.472)	0.112 (0.774)	0.028 (0.320)	0.012 (0.155)	-0.575 (0.858)	-0.051 (0.586)
f_Aerococcaceae	-0.43134	0.996416	0.454874	0.1428	-0.003 (0.507)	-0.090 (0.844)	0.002 (0.266)	-0.004 (0.090)	-0.585 (0.940)	0.134 (0.667)
g_Neomicrococcus	-0.431495	0.964706	0.320135	0.143921	0.040 (0.197)	-0.354 (0.851)	0.003 (0.302)	0.004 (0.090)	-0.094 (0.730)	-0.147 (0.597)
g_CHKCI001	-0.432412	0.728072	0.103016	0.0781763	-0.012 (0.109)	0.008 (0.090)	0.002 (0.045)	0.000 (0.000)	-0.443 (0.714)	0.005 (0.144)
g_Verticiella	-0.433964	0.874867	0.205246	0.111424	0.004 (0.064)	-0.014 (0.162)	-0.002 (0.101)	0.000 (0.000)	-0.390 (0.846)	-0.063 (0.593)
g_HN-HF0106	-0.444651	0.583934	0.0512675	0.0486696	0.000 (0.000)	0.000 (0.000)	-0.002 (0.045)	0.000 (0.000)	-0.448 (0.581)	0.004 (0.064)
g_Mobiluncus	-0.446799	0.940898	0.218849	0.0867941	-0.025 (0.359)	0.072 (0.543)	-0.028 (0.403)	-0.000 (0.063)	-0.352 (0.791)	-0.268 (0.738)
g_Howardella	-0.449543	0.746832	0.162227	0.0825891	-0.002 (0.078)	-0.010 (0.191)	0.012 (0.127)	0.000 (0.000)	-0.032 (0.413)	-0.435 (0.703)
g_Prevotellaceae Ga6A1 group	-0.456622	0.808773	0.109154	0.0786821	-0.002 (0.045)	-0.003 (0.112)	-0.325 (0.783)	0.000 (0.000)	-0.206 (0.500)	0.010 (0.135)
g_Peptoanaerobacter	-0.470644	0.888476	0.19156	0.0930209	0.006 (0.078)	0.010 (0.119)	-0.022 (0.659)	0.004 (0.063)	-0.032 (0.428)	-0.502 (0.720)
g_Simonsiella	-0.476202	0.852509	0.16277	0.0870859	0.012 (0.238)	0.027 (0.253)	0.000 (0.000)	-0.000 (0.110)	0.037 (0.212)	-0.532 (0.812)
g_Phytobacter	-0.491325	0.75896	0.0877607	0.0622468	0.004 (0.064)	0.002 (0.045)	-0.076 (0.302)	0.000 (0.000)	0.008 (0.274)	-0.444 (0.732)
g_Massiliprevotella	-0.500229	0.929901	0.192644	0.10074	-0.008 (0.142)	0.118 (0.554)	-0.024 (0.359)	0.000 (0.000)	-0.646 (0.849)	0.036 (0.307)
g_Erysipelothrix	-0.503289	1.02171	0.582663	0.188569	0.015 (0.298)	0.395 (0.612)	0.168 (0.667)	0.002 (0.045)	-0.810 (0.948)	-0.129 (0.930)
g_Lacticaseibacillus	-0.514683	1.07529	1.41079	0.278125	0.011 (0.599)	0.726 (1.032)	-0.080 (0.988)	0.016 (0.262)	-0.784 (1.079)	-0.570 (1.012)
g_Algoriella	-0.537498	0.87858	0.293122	0.136348	0.079 (0.408)	-0.016 (0.190)	-0.001 (0.295)	0.000 (0.000)	-0.651 (0.857)	0.085 (0.299)
g_Verrucomicrobium	-0.538376	0.968872	0.489349	0.21227	-0.008 (0.156)	0.059 (0.564)	-0.020 (0.179)	-0.004 (0.090)	-0.549 (0.952)	-0.069 (0.354)
g_Aeriscardovia	-0.539382	0.743827	0.0919481	0.0724795	0.000 (0.000)	0.000 (0.000)	0.000 (0.000)	0.000 (0.000)	0.000 (0.000)	-0.539 (0.744)
g_Globicatella	-0.539913	0.863137	0.163747	0.0957191	0.050 (0.219)	0.118 (0.460)	-0.004 (0.110)	0.000 (0.000)	-0.709 (0.757)	-0.014 (0.266)
g_Youngiibacter	-0.540405	0.955815	0.172138	0.123656	-0.012 (0.110)	-0.542 (0.958)	0.004 (0.064)	0.000 (0.000)	0.002 (0.045)	0.002 (0.045)
g_Carnobacterium	-0.547173	1.05119	0.992824	0.247618	0.112 (0.424)	-0.124 (1.125)	-0.171 (0.772)	-0.000 (0.064)	-0.534 (1.030)	-0.057 (0.802)
g_Alysiella	-0.554622	0.859877	0.139269	0.0739398	-0.098 (0.371)	0.018 (0.551)	0.004 (0.064)	0.002 (0.045)	-0.136 (0.515)	-0.517 (0.701)
g_Desemzia	-0.559278	1.11731	0.795239	0.272741	-0.004 (0.201)	0.699 (0.723)	-0.287 (0.676)	0.002 (0.045)	-1.015 (0.956)	0.043 (0.637)
g_Salinicoccus	-0.57467	0.918636	0.258548	0.120155	-0.002 (0.149)	0.167 (0.541)	-0.008 (0.180)	0.000 (0.000)	-0.732 (0.859)	0.119 (0.586)
g_Aliicoccus	-0.577018	0.937353	0.221186	0.103006	0.000 (0.127)	-0.213 (0.895)	-0.014 (0.162)	0.000 (0.000)	-0.571 (0.716)	0.040 (0.411)
g_[Eubacterium] ventriosum group	-0.58215	0.797874	0.124439	0.0764849	0.091 (0.385)	-0.004 (0.127)	0.004 (0.064)	0.000 (0.000)	-0.648 (0.761)	0.001 (0.305)
g_Pseudostreptobacillus	-0.583989	1.09729	1.14061	0.257672	-1.029 (1.016)	0.657 (0.851)	0.058 (0.333)	0.026 (0.510)	0.114 (0.512)	0.001 (1.049)
g_Acidipropionibacterium	-0.591575	0.998966	0.363636	0.15309	-0.155 (0.568)	-0.528 (0.952)	0.010 (0.119)	0.000 (0.064)	-0.255 (0.623)	0.192 (0.435)
g_Garicola	-0.592956	0.898807	0.20509	0.101456	0.069 (0.399)	0.008 (0.090)	-0.019 (0.345)	0.008 (0.090)	-0.484 (0.773)	-0.321 (0.744)
f_Sutterellaceae	-0.596197	0.884507	0.322745	0.165916	0.026 (0.160)	-0.004 (0.168)	-0.026 (0.184)	0.002 (0.045)	-0.643 (0.858)	0.035 (0.218)
g_Propionimicrobium	-0.603506	0.809112	0.119062	0.0759161	-0.012 (0.110)	-0.013 (0.367)	0.046 (0.211)	0.000 (0.000)	-0.687 (0.742)	0.053 (0.227)
f_Morganellaceae	-0.609275	1.15193	0.617655	0.217749	0.247 (0.957)	-0.127 (0.437)	0.011 (0.312)	0.006 (0.078)	-1.077 (1.011)	0.016 (0.331)
g_Criibacterium	-0.6141	0.868373	0.189498	0.0967368	0.006 (0.100)	-0.147 (0.718)	0.038 (0.243)	0.000 (0.000)	-0.639 (0.709)	0.036 (0.393)
g_Suttonella	-0.648311	0.929766	0.176802	0.10292	0.000 (0.000)	-0.015 (0.448)	-0.627 (0.862)	0.000 (0.000)	-0.070 (0.310)	-0.045 (0.502)
g_Parascardovia	-0.649375	0.919582	0.275814	0.116769	-0.043 (0.452)	0.013 (0.301)	-0.252 (0.577)	0.004 (0.064)	0.115 (0.739)	-0.654 (0.859)
f_Dermabacteraceae	-0.671414	0.986217	0.35379	0.127818	-0.052 (0.330)	-0.042 (0.503)	0.030 (0.733)	0.022 (0.148)	-0.687 (0.848)	-0.139 (0.851)
f_Verrucomicrobiaceae	-0.678122	1.06981	0.947784	0.239126	-0.060 (0.567)	0.189 (1.002)	-0.760 (0.984)	0.014 (0.233)	-0.485 (1.043)	0.064 (0.977)
g_Pseudarthrobacter	-0.687831	1.0314	0.95641	0.209621	0.132 (0.746)	0.300 (0.960)	-0.156 (0.914)	0.110 (0.578)	-1.298 (0.879)	0.091 (0.968)
g_Canicola	-0.695463	0.904998	0.300991	0.143663	0.158 (0.407)	-0.110 (0.538)	-0.009 (0.162)	0.000 (0.000)	-0.790 (0.847)	0.008 (0.590)
g_Erysipelotrichaceae UCG-006	-0.696797	0.849817	0.145452	0.0836324	-0.014 (0.118)	0.006 (0.078)	0.003 (0.284)	-0.004 (0.063)	-0.077 (0.381)	-0.670 (0.828)
g_Paeniclostridium	-0.697272	1.0638	0.328276	0.136165	0.083 (0.565)	-0.074 (0.514)	-0.470 (0.934)	0.073 (0.267)	-0.633 (0.804)	-0.082 (0.645)
g_Eremococcus	-0.699509	1.05853	0.407466	0.171819	0.014 (0.149)	0.362 (0.636)	-0.091 (0.622)	0.000 (0.000)	-1.175 (0.862)	0.156 (0.619)
g_Vagococcus	-0.70059	0.918739	0.290372	0.129366	0.004 (0.063)	0.005 (0.229)	-0.224 (0.695)	0.002 (0.045)	-0.585 (0.889)	-0.067 (0.489)
g_Hathewaya	-0.741596	0.836559	0.128943	0.09658	0.000 (0.000)	0.000 (0.000)	0.000 (0.000)	0.002 (0.045)	0.004 (0.064)	-0.744 (0.836)
g_Pasteurella	-0.763659	1.0493	0.348358	0.220794	0.002 (0.174)	0.387 (0.656)	0.008 (0.090)	0.000 (0.000)	-0.978 (0.999)	-0.012 (0.372)
g_Latilactobacillus	-0.766616	1.00795	1.2564	0.276745	-0.131 (0.798)	0.031 (1.028)	-0.180 (0.858)	0.048 (0.215)	-1.393 (0.894)	0.488 (1.022)
g_Lachnospiraceae UCG-004	-0.793779	0.981424	0.37844	0.163893	0.018 (0.514)	0.195 (0.715)	-0.010 (0.162)	0.103 (0.320)	-1.062 (0.887)	0.034 (0.338)
g_Yaniella	-0.799332	1.0696	0.497451	0.212379	0.093 (0.351)	-0.192 (0.532)	-0.237 (1.059)	-0.004 (0.110)	-0.933 (0.778)	0.046 (0.380)
g_Ruminiclostridium	-0.826135	0.939987	0.209847	0.127838	0.004 (0.064)	0.004 (0.064)	0.062 (0.556)	0.000 (0.000)	-0.884 (0.886)	-0.022 (0.224)
g_Moryella	-0.838168	0.857992	0.21023	0.10391	-0.008 (0.368)	-0.089 (0.685)	-0.002 (0.119)	-0.020 (0.155)	-0.819 (0.805)	-0.083 (0.381)
g_Anaeroglobus	-0.867542	1.01835	0.7852	0.213628	-0.001 (0.411)	0.134 (0.560)	0.317 (0.537)	-0.055 (0.257)	-0.541 (1.040)	-0.786 (0.968)
g_Oligella	-0.954046	0.997594	1.04411	0.35382	-0.084 (0.476)	-0.212 (0.962)	1.171 (0.974)	-0.026 (0.194)	-1.791 (0.867)	0.874 (0.805)
g_Lacticigenium	-1.01486	1.13124	0.309658	0.197197	-0.010 (0.100)	-0.000 (0.064)	0.004 (0.064)	0.000 (0.000)	-1.016 (1.127)	0.000 (0.000)
f_Family XI	-1.05198	0.96541	0.544179	0.181134	-0.012 (0.436)	0.116 (0.757)	-0.038 (0.771)	-0.000 (0.064)	-1.489 (0.765)	0.417 (0.809)
g_Saccharedens	-1.05241	0.911255	0.175284	0.121517	-0.010 (0.100)	0.000 (0.090)	0.000 (0.000)	0.000 (0.000)	-1.045 (0.911)	-0.008 (0.142)
g_Aquirhabdus	-1.09635	0.942909	0.312069	0.165144	0.004 (0.090)	-0.034 (0.355)	-0.042 (0.221)	0.000 (0.000)	-1.060 (0.920)	-0.108 (0.502)
g_Terrisporobacter	-1.1692	1.02239	0.273912	0.130836	-0.016 (0.179)	0.009 (0.542)	-0.045 (0.305)	0.004 (0.064)	-1.328 (0.915)	0.147 (0.654)
g_Propionibacterium	-1.30239	1.17644	0.513079	0.221376	0.116 (0.393)	0.006 (0.162)	-0.104 (0.552)	0.000 (0.000)	-1.436 (1.067)	-0.015 (0.918)
g_Proteiniclasticum	-1.3724	0.999204	0.270915	0.162911	0.000 (0.000)	-0.004 (0.110)	-0.043 (0.295)	0.000 (0.000)	-1.368 (0.997)	0.000 (0.090)
g_Eperythrozoon	-1.39086	1.21711	0.635253	0.280498	0.000 (0.000)	-0.033 (0.193)	-0.420 (1.033)	0.000 (0.000)	-1.164 (1.242)	0.004 (0.063)
g_Atopobium	-1.49859	0.906642	0.443561	0.187091	0.028 (0.291)	-0.035 (0.561)	0.269 (0.780)	0.002 (0.045)	-1.660 (0.857)	-0.042 (0.407)

## Sheet: S7
Table S7. High and Low confidence Results from SVM and Random Forest. Determination of SVM and Random Forest predicted probability and dominant genera relative abundance thresholds for NPCST genera using Youden's J statistic applied to SVM predicted probabilities from testing sets across the 5-fold cross-validation analysis (100 iterations)
Machine Learning Model	NPCST	NPCST Dominant Genera	Optimal SVM NPCST-Specific Probability Threshold	Optimal Dominant Genus Relative Abundance Threshold	Sensitivity	Specificity	Youden's J	Low Confidence Accuracy	High Confidence Accuracy	Accuracy on Evaluated Samples	Evaluated Samples (Out of Available Samples)*
SVM	I	g_Moraxella	0.46	0.52	0.9706	0.924672	0.895357	0.0819516	0.973318	0.534951	14,964/205,700
	II	g_Dolosigranulum	0.45	0.75	0.942159	0.936253	0.878411	0.0742702	0.950478	0.542491	16,627/198,400
	II	g_Corynebacterium	0.45	0.63	0.942159	0.936253	0.878411	0.0742702	0.950478	0.542491	16,627/198,400
	III	g_Staphylococcus	0.44	0.51	0.964475	0.910883	0.875358	0.105608	0.970384	0.561	9,041/99,300
	IV	g_Haemophilus	0.49	0.56	0.958661	0.904132	0.862794	0.263238	0.987365	0.781317	2,323/37,100
	VI	g_Streptococcus	0.49	0.56	0.940891	0.850853	0.791744	0.180176	0.952284	0.580965	12,314/142,400
Random Forest	I	g_Moraxella	0.42	0.62	0.950048	0.911508	0.861556	0.143723	0.970486	0.629386	25,366/205,700
	II	g_Dolosigranulum	0.45	0.43	0.961813	0.931186	0.892999	0.138693	0.982105	0.69237	25,963/198,400
	II	g_Corynebacterium	0.45	0.66	0.962189	0.930841	0.893	0.1394	0.9822	0.693209	26,034/198,400
	III	g_Staphylococcus	0.42	0.59	0.9577	0.94398	0.901689	0.09401	0.975368	0.639547	14,823/99,300
	IV	g_Haemophilus	0.47	0.65	0.978888	0.925646	0.90453	0.1071	0.98577	0.61249	3,667/37,100
	VI	g_Streptococcus	0.45	0.64	0.958064	0.929853	0.887917	0.192408	0.98633	0.764928	30,229/142,400
* To optimize computational efficiency, threshold optimization was restricted to samples with both predicted probability and relative abundance < 0.75. Samples exceeding these thresholds demonstrate minimal misclassification due to clear dominance of target genera and were therefore excluded from the optimization analysis. Consequently, the reported accuracy metrics for High Confidence group refl…

## Sheet: S9
Table S9. SPEC-EASI assciation results. The results includes global as well as individual NPCST-specific networks."_unclassifiedFamily" represents the correpsonding taxa did not resolve with a genus-level detection, and it is unclassified family level assignment.
Node 1	Node 2	Association	Network Type
g_Acinetobacter	g_Cutibacterium	0.000485352	Global
g_Acinetobacter	g_Micrococcus	0.100764	Global
g_Acinetobacter	g_Staphylococcus	0.0659704	Global
g_Acinetobacter	g_Enhydrobacter	0.183843	Global
g_Acinetobacter	g_Enterobacteriaceae__unclassifiedFamily	0.0196137	Global
g_Acinetobacter	g_Escherichia-Shigella	0.0364526	Global
g_Acinetobacter	g_Chryseobacterium	0.136069	Global
g_Acinetobacter	g_Kocuria	0.0152722	Global
g_Acinetobacter	g_Leptotrichiaceae__unclassifiedFamily	-0.00761103	Global
g_Acinetobacter	g_Catonella	-0.00486662	Global
g_Acinetobacter	g_Oribacterium	-0.00327648	Global
g_Acinetobacter	g_Solobacterium	-0.0018651	Global
g_Acinetobacter	g_Achromobacter	0.0238573	Global
g_Bergeyella	g_Gemella	0.0322051	Global
g_Bergeyella	g_Neisseria	0.0129773	Global
g_Bergeyella	g_Anaerococcus	-0.0328068	Global
g_Bergeyella	g_Granulicatella	0.0224177	Global
g_Bergeyella	g_Pasteurellaceae__unclassifiedFamily	0.00584819	Global
g_Bergeyella	g_Peptoniphilus	-0.0205338	Global
g_Bergeyella	g_Pseudoleptotrichia	0.00251014	Global
g_Bergeyella	g_Eikenella	0.00590735	Global
g_Corynebacterium	g_Dolosigranulum	0.334293	Global
g_Corynebacterium	g_Staphylococcus	0.145735	Global
g_Corynebacterium	g_Streptococcus	-0.00160412	Global
g_Corynebacterium	g_Veillonella	-0.0330349	Global
g_Corynebacterium	g_Neisseriaceae__unclassifiedFamily	0.0202308	Global
g_Corynebacterium	g_Prevotella	-0.0380931	Global
g_Corynebacterium	g_Anaerococcus	0.0537185	Global
g_Corynebacterium	g_Fusobacterium	-0.0135022	Global
g_Corynebacterium	g_Segatella	-0.0368921	Global
g_Corynebacterium	g_Lachnoanaerobaculum	-0.0169099	Global
g_Corynebacterium	g_Propionibacteriaceae__unclassifiedFamily	0.00817566	Global
g_Corynebacterium	g_Oribacterium	-0.0450168	Global
g_Cutibacterium	g_Staphylococcus	0.0543095	Global
g_Cutibacterium	g_Anaerococcus	0.0679075	Global
g_Cutibacterium	g_Lawsonella	0.103694	Global
g_Cutibacterium	g_Propionibacteriaceae__unclassifiedFamily	0.136876	Global
g_Dolosigranulum	g_Moraxella	0.208254	Global
g_Gemella	g_Haemophilus	0.018633	Global
g_Gemella	g_Rothia	0.0296713	Global
g_Gemella	g_Streptococcus	0.118697	Global
g_Gemella	g_Veillonella	0.00945525	Global
g_Gemella	g_Prevotellaceae__unclassifiedFamily	0.0291604	Global
g_Gemella	g_Brachybacterium	-0.00882454	Global
g_Gemella	g_Neisseria	0.126561	Global
g_Gemella	g_Fusobacterium	0.0374681	Global
g_Gemella	g_Granulicatella	0.186689	Global
g_Gemella	g_Enterobacteriaceae__unclassifiedFamily	-0.00190592	Global
g_Gemella	g_Porphyromonas	0.108254	Global
g_Gemella	g_Negativicoccus	-0.0134267	Global
g_Gemella	g_Faecalibacterium	-0.000362791	Global
g_Haemophilus	g_Staphylococcus	-0.0104232	Global
g_Haemophilus	g_Streptococcus	0.115571	Global
g_Haemophilus	g_Neisseria	0.0816842	Global
g_Haemophilus	g_Moraxella	0.00498768	Global
g_Haemophilus	g_Anaerococcus	-0.012554	Global
g_Micrococcus	g_Staphylococcus	0.00396209	Global
g_Micrococcus	g_Enhydrobacter	0.214981	Global
g_Micrococcus	g_Micrococcaceae__unclassifiedFamily	0.011183	Global
g_Micrococcus	g_Kocuria	0.0136532	Global
g_Micrococcus	g_Lachnoanaerobaculum	-0.00147662	Global
g_Micrococcus	g_Oribacterium	-0.0103248	Global
g_Rothia	g_Streptococcus	0.0264685	Global
g_Rothia	g_Veillonella	0.10643	Global
g_Rothia	g_Actinomyces	0.110743	Global
g_Rothia	g_Granulicatella	0.0788861	Global
g_Rothia	g_Schaalia	0.146848	Global
g_Rothia	g_Negativicoccus	-0.00775487	Global
g_Rothia	g_Selenomonadaceae__unclassifiedFamily	-0.000175757	Global
g_Staphylococcus	g_Prevotellaceae__unclassifiedFamily	-0.00391338	Global
g_Staphylococcus	g_Enhydrobacter	0.0136577	Global
g_Staphylococcus	g_Anaerococcus	0.146863	Global
g_Staphylococcus	g_Leptotrichiaceae__unclassifiedFamily	-0.0146585	Global
g_Staphylococcus	g_Lachnoanaerobaculum	-0.0243576	Global
g_Staphylococcus	g_Lawsonella	0.00605048	Global
g_Staphylococcus	g_Oribacterium	-0.0146806	Global
g_Streptococcus	g_Veillonella	0.0821213	Global
g_Streptococcus	g_Anaerococcus	-0.0191459	Global
g_Streptococcus	g_Peptoniphilus	-0.0216735	Global
g_Veillonella	g_Prevotellaceae__unclassifiedFamily	0.0168072	Global
g_Veillonella	g_Prevotella	0.257643	Global
g_Veillonella	g_Micrococcaceae__unclassifiedFamily	-0.00569994	Global
g_Veillonella	g_Schaalia	0.177633	Global
g_Veillonella	g_Negativicoccus	-0.0265577	Global
g_Veillonella	g_Leuconostoc	-0.0224735	Global
g_Veillonella	g_Leptotrichia	0.0470831	Global
g_Veillonella	g_Propionibacteriaceae__unclassifiedFamily	-0.0338642	Global
g_Veillonella	g_Achromobacter	-0.00277537	Global
g_Lachnospiraceae__unclassifiedFamily	g_Selenomonas	0.00327244	Global
g_Lachnospiraceae__unclassifiedFamily	g_Bacteroides	0.0466702	Global
g_Lachnospiraceae__unclassifiedFamily	g_Stomatobaculum	0.0303236	Global
g_Lachnospiraceae__unclassifiedFamily	g_Faecalibacterium	0.0214559	Global
g_Lachnospiraceae__unclassifiedFamily	g_Ruminococcaceae__unclassifiedFamily	0.0900772	Global
g_Lachnospiraceae__unclassifiedFamily	g_Solobacterium	0.00717377	Global
g_Prevotellaceae__unclassifiedFamily	g_Neisseria	0.0427031	Global
g_Prevotellaceae__unclassifiedFamily	g_Prevotella	0.00727706	Global
g_Prevotellaceae__unclassifiedFamily	g_Anaerococcus	-0.0318318	Global
g_Prevotellaceae__unclassifiedFamily	g_Finegoldia	-0.00293607	Global
g_Prevotellaceae__unclassifiedFamily	g_Fusobacterium	0.0867218	Global
g_Prevotellaceae__unclassifiedFamily	g_Enterobacteriaceae__unclassifiedFamily	-0.0271889	Global
g_Prevotellaceae__unclassifiedFamily	g_Micrococcaceae__unclassifiedFamily	-0.020911	Global
g_Prevotellaceae__unclassifiedFamily	g_Porphyromonas	0.177837	Global
g_Prevotellaceae__unclassifiedFamily	g_Peptoniphilus	-0.00681643	Global
g_Prevotellaceae__unclassifiedFamily	g_Achromobacter	-0.0121238	Global
g_Bifidobacterium	g_Bacteroides	0.0392476	Global
g_Bifidobacterium	g_Faecalibacterium	0.0013236	Global
g_Bifidobacterium	g_Ruminococcaceae__unclassifiedFamily	0.0633893	Global
g_Bifidobacterium	g_Selenomonadaceae__unclassifiedFamily	0.0395381	Global
g_Actinomyces	g_Schaalia	0.121519	Global
g_Actinomyces	g_Johnsonella	-0.0676572	Global
g_Actinomyces	g_Leptotrichia	0.12095	Global
g_Brachybacterium	g_Prevotella	-0.0376998	Global
g_Brachybacterium	g_Fusobacterium	-0.0229823	Global
g_Brachybacterium	g_Micrococcaceae__unclassifiedFamily	0.0696077	Global
g_Brachybacterium	g_Schaalia	-0.00617698	Global
g_Brachybacterium	g_Porphyromonas	-0.00387295	Global
g_Brachybacterium	g_Kocuria	0.039606	Global
g_Brachybacterium	g_Faecalibacterium	0.00051611	Global
g_Enhydrobacter	g_Anaerococcus	0.020609	Global
g_Enhydrobacter	g_Chryseobacterium	0.124308	Global
g_Enhydrobacter	g_Johnsonella	-0.00548344	Global
g_Enhydrobacter	g_Kocuria	0.0480357	Global
g_Enhydrobacter	g_Leptotrichiaceae__unclassifiedFamily	-0.0108094	Global
g_Enhydrobacter	g_Catonella	-0.00064127	Global
g_Enhydrobacter	g_Oribacterium	-0.0103894	Global
g_Enhydrobacter	g_Solobacterium	-0.00749647	Global
g_Neisseriaceae__unclassifiedFamily	g_Anaerococcus	0.0142682	Global
g_Neisseriaceae__unclassifiedFamily	g_Lancefieldella	-0.00101967	Global
g_Neisseriaceae__unclassifiedFamily	g_Selenomonas	-0.004859	Global
g_Neisseriaceae__unclassifiedFamily	g_Oribacterium	-0.0236848	Global
g_Neisseria	g_Granulicatella	0.143205	Global
g_Neisseria	g_Lactobacillus	-0.00253108	Global
g_Neisseria	g_Pasteurellaceae__unclassifiedFamily	0.00633941	Global
g_Neisseria	g_Dialister	-0.00349617	Global
g_Neisseria	g_Porphyromonas	0.0649154	Global
g_Moraxella	g_Prevotella	-0.013038	Global
g_Moraxella	g_Johnsonella	0.00575993	Global
g_Moraxella	g_Campylobacter	-0.0251857	Global
g_Lactococcus	g_Prevotella	-0.0108199	Global
g_Lactococcus	g_Leuconostoc	0.0364659	Global
g_Lactococcus	g_Campylobacter	-0.00303566	Global
g_Prevotella	g_Fusobacterium	0.0451662	Global
g_Prevotella	g_Micrococcaceae__unclassifiedFamily	-0.030857	Global
g_Prevotella	g_Schaalia	0.0862348	Global
g_Prevotella	g_Segatella	0.158433	Global
g_Prevotella	g_Leuconostoc	-0.0386098	Global
g_Prevotella	g_Campylobacter	0.118988	Global
g_Prevotella	g_Leptotrichia	0.0124759	Global
g_Prevotella	g_Faecalibacterium	-0.00504472	Global
g_Prevotella	g_Ruminococcaceae__unclassifiedFamily	-0.0181872	Global
g_Prevotella	g_Achromobacter	-0.024486	Global
g_Prevotella	g_Actinomycetaceae__unclassifiedFamily	-0.0418668	Global
g_Anaerococcus	g_Finegoldia	0.247735	Global
g_Anaerococcus	g_Johnsonella	-0.0658964	Global
g_Anaerococcus	g_Peptoniphilus	0.367818	Global
g_Anaerococcus	g_Leptotrichiaceae__unclassifiedFamily	-0.0502207	Global
g_Anaerococcus	g_Pseudoleptotrichia	-0.0135883	Global
g_Anaerococcus	g_Lawsonella	0.107081	Global
g_Anaerococcus	g_Catonella	-0.0241974	Global
g_Finegoldia	g_Dialister	0.00210581	Global
g_Finegoldia	g_Negativicoccus	0.0707806	Global
g_Finegoldia	g_Peptoniphilus	0.368479	Global
g_Finegoldia	g_Campylobacter	0.0032113	Global
g_Finegoldia	g_Pseudoleptotrichia	-0.0162112	Global
g_Finegoldia	g_Lawsonella	0.0220011	Global
g_Finegoldia	g_Propionibacteriaceae__unclassifiedFamily	0.0113373	Global
g_Fusobacterium	g_Lactobacillus	-1.51456e-05	Global
g_Fusobacterium	g_Enterobacteriaceae__unclassifiedFamily	-0.0124679	Global
g_Fusobacterium	g_Micrococcaceae__unclassifiedFamily	-0.0157765	Global
g_Fusobacterium	g_Porphyromonas	0.170798	Global
g_Fusobacterium	g_Negativicoccus	-0.0212895	Global
g_Fusobacterium	g_Hoylesella	0.0470811	Global
g_Fusobacterium	g_Leuconostoc	-0.0246501	Global
g_Fusobacterium	g_Pseudoleptotrichia	0.0270722	Global
g_Fusobacterium	g_Propionibacteriaceae__unclassifiedFamily	-0.0120121	Global
g_Fusobacterium	g_Parvimonas	0.0854948	Global
g_Fusobacterium	g_Achromobacter	-0.0178695	Global
g_Granulicatella	g_Pasteurellaceae__unclassifiedFamily	0.0189698	Global
g_Granulicatella	g_Schaalia	0.0015101	Global
g_Granulicatella	g_Selenomonadaceae__unclassifiedFamily	-0.00152391	Global
g_Lactobacillus	g_Faecalibacterium	0.00376237	Global
g_Enterobacteriaceae__unclassifiedFamily	g_Porphyromonas	-0.00534853	Global
g_Pasteurellaceae__unclassifiedFamily	g_Eikenella	0.0021778	Global
g_Lancefieldella	g_Selenomonas	0.0414313	Global
g_Lancefieldella	g_Schaalia	0.0248057	Global
g_Lancefieldella	g_Segatella	0.0236382	Global
g_Lancefieldella	g_Stomatobaculum	0.128609	Global
g_Lancefieldella	g_Megasphaera	0.160473	Global
g_Lancefieldella	g_Oribacterium	0.0459633	Global
g_Lancefieldella	g_Alloprevotella	0.0143381	Global
g_Lancefieldella	g_Solobacterium	0.0767164	Global
g_Micrococcaceae__unclassifiedFamily	g_Chryseobacterium	0.00437613	Global
g_Selenomonas	g_Segatella	0.110288	Global
g_Selenomonas	g_Stomatobaculum	0.0499246	Global
g_Selenomonas	g_Lachnoanaerobaculum	0.0174627	Global
g_Selenomonas	g_Megasphaera	0.0595182	Global
g_Selenomonas	g_Leptotrichia	0.0531172	Global
g_Selenomonas	g_Catonella	0.0253597	Global
g_Selenomonas	g_Oribacterium	0.094357	Global
g_Selenomonas	g_Selenomonadaceae__unclassifiedFamily	0.125215	Global
g_Escherichia-Shigella	g_Bacteroides	0.0411817	Global
g_Dialister	g_Negativicoccus	0.122613	Global
g_Schaalia	g_Negativicoccus	-0.000737159	Global
g_Schaalia	g_Stomatobaculum	0.00189421	Global
g_Schaalia	g_Lachnoanaerobaculum	0.0299992	Global
g_Schaalia	g_Leptotrichia	0.00277745	Global
g_Schaalia	g_Faecalibacterium	-0.00927612	Global
g_Schaalia	g_Oribacterium	0.00631681	Global
g_Chryseobacterium	g_Kocuria	0.0342219	Global
g_Johnsonella	g_Leptotrichiaceae__unclassifiedFamily	0.00281954	Global
g_Johnsonella	g_Catonella	0.0194246	Global
g_Porphyromonas	g_Hoylesella	0.0916438	Global
g_Porphyromonas	g_Leuconostoc	-0.00398483	Global
g_Porphyromonas	g_Achromobacter	-0.014505	Global
g_Bacteroides	g_Faecalibacterium	0.0705449	Global
g_Bacteroides	g_Ruminococcaceae__unclassifiedFamily	0.2926	Global
g_Negativicoccus	g_Peptoniphilus	0.00106115	Global
g_Negativicoccus	g_Propionibacteriaceae__unclassifiedFamily	0.0510111	Global
g_Hoylesella	g_Leuconostoc	-0.000667438	Global
g_Hoylesella	g_Campylobacter	0.148613	Global
g_Peptoniphilus	g_Pseudoleptotrichia	-0.00491988	Global
g_Peptoniphilus	g_Lawsonella	0.081558	Global
g_Peptoniphilus	g_Propionibacteriaceae__unclassifiedFamily	0.0257025	Global
g_Segatella	g_Campylobacter	0.0251967	Global
g_Segatella	g_Megasphaera	0.106029	Global
g_Segatella	g_Leptotrichia	0.0267455	Global
g_Segatella	g_Alloprevotella	0.0309942	Global
g_Leptotrichiaceae__unclassifiedFamily	g_Stomatobaculum	0.0179295	Global
g_Leptotrichiaceae__unclassifiedFamily	g_Lawsonella	-0.000120242	Global
g_Leptotrichiaceae__unclassifiedFamily	g_Megasphaera	0.00426161	Global
g_Aggregatibacter	g_Eikenella	0.061996	Global
g_Leuconostoc	g_Ruminococcaceae__unclassifiedFamily	0.0014793	Global
g_Stomatobaculum	g_Lachnoanaerobaculum	0.168934	Global
g_Stomatobaculum	g_Megasphaera	0.0664785	Global
g_Stomatobaculum	g_Oribacterium	0.225249	Global
g_Stomatobaculum	g_Solobacterium	0.0802135	Global
g_Stomatobaculum	g_Tannerella	0.00831003	Global
g_Lachnoanaerobaculum	g_Pseudoleptotrichia	0.072102	Global
g_Lachnoanaerobaculum	g_Leptotrichia	0.0918465	Global
g_Lachnoanaerobaculum	g_Oribacterium	0.115226	Global
g_Pseudoleptotrichia	g_Leptotrichia	0.00375762	Global
g_Pseudoleptotrichia	g_Oribacterium	0.00714347	Global
g_Treponema	g_Catonella	0.0688446	Global
g_Treponema	g_Parvimonas	0.207501	Global
g_Treponema	g_Alloprevotella	0.114489	Global
g_Treponema	g_Centipeda	0.00528234	Global
g_Treponema	g_Tannerella	0.134741	Global
g_Megasphaera	g_Oribacterium	0.0383506	Global
g_Megasphaera	g_Alloprevotella	0.0356093	Global
g_Megasphaera	g_Selenomonadaceae__unclassifiedFamily	0.00602209	Global
g_Megasphaera	g_Solobacterium	0.0806164	Global
g_Peptostreptococcus	g_Catonella	0.126713	Global
g_Peptostreptococcus	g_Parvimonas	0.0950518	Global
g_Peptostreptococcus	g_Alloprevotella	0.0289281	Global
g_Peptostreptococcus	g_Solobacterium	0.107984	Global
g_Peptostreptococcus	g_Tannerella	0.00272131	Global
g_Abiotrophia	g_Eikenella	0.0502	Global
g_Catonella	g_Oribacterium	0.0403755	Global
g_Catonella	g_Parvimonas	0.0349749	Global
g_Catonella	g_Alloprevotella	0.0157022	Global
g_Catonella	g_Centipeda	0.00642363	Global
g_Catonella	g_Solobacterium	0.0642434	Global
g_Catonella	g_Tannerella	0.0536636	Global
g_Faecalibacterium	g_Ruminococcaceae__unclassifiedFamily	0.295582	Global
g_Faecalibacterium	g_Selenomonadaceae__unclassifiedFamily	0.00799801	Global
g_Oribacterium	g_Solobacterium	0.147047	Global
g_Ruminococcaceae__unclassifiedFamily	g_Selenomonadaceae__unclassifiedFamily	0.0165985	Global
g_Alloprevotella	g_Solobacterium	0.0155325	Global
g_Alloprevotella	g_Tannerella	0.0626906	Global
g_Centipeda	g_Selenomonadaceae__unclassifiedFamily	0.0242006	Global
g_Centipeda	g_Tannerella	0.0380898	Global
g_Centipeda	g_Actinomycetaceae__unclassifiedFamily	0.0910087	Global
g_Eikenella	g_Actinomycetaceae__unclassifiedFamily	0.000547636	Global
g_Selenomonadaceae__unclassifiedFamily	g_Solobacterium	0.0133441	Global
g_Selenomonadaceae__unclassifiedFamily	g_Tannerella	0.0272389	Global
g_Solobacterium	g_Tannerella	0.018396	Global
g_Acinetobacter	g_Micrococcus	0.0177649	I
g_Acinetobacter	g_Enhydrobacter	0.13411	I
g_Acinetobacter	g_Chryseobacterium	0.0982753	I
g_Corynebacterium	g_Dolosigranulum	0.243442	I
g_Dolosigranulum	g_Moraxella	0.0212221	I
g_Haemophilus	g_Streptococcus	0.147759	I
g_Haemophilus	g_Anaerococcus	-0.0156978	I
g_Rothia	g_Veillonella	0.0145923	I
g_Rothia	g_Actinomyces	0.00538093	I
g_Rothia	g_Schaalia	0.0357032	I
g_Rothia	g_Granulicatella	0.0118496	I
g_Staphylococcus	g_Prevotellaceae__unclassifiedFamily	-0.0355383	I
g_Staphylococcus	g_Anaerococcus	0.0653486	I
g_Streptococcus	g_Gemella	0.0661516	I
g_Streptococcus	g_Anaerococcus	-0.0409063	I
g_Streptococcus	g_Peptoniphilus	-0.00853042	I
g_Veillonella	g_Gemella	0.0215379	I
g_Veillonella	g_Schaalia	0.129491	I
g_Veillonella	g_Granulicatella	0.0370242	I
g_Veillonella	g_Prevotella	0.0587901	I
g_Actinomyces	g_Leptotrichia	0.0059879	I
g_Cutibacterium	g_Anaerococcus	0.0537004	I
g_Cutibacterium	g_Lawsonella	0.048282	I
g_Gemella	g_Neisseria	0.139844	I
g_Gemella	g_Granulicatella	0.0832468	I
g_Gemella	g_Porphyromonas	0.113295	I
g_Gemella	g_Prevotellaceae__unclassifiedFamily	0.0977909	I
g_Gemella	g_Anaerococcus	-0.0296946	I
g_Gemella	g_Lawsonella	-0.0222947	I
g_Micrococcus	g_Enhydrobacter	0.109991	I
g_Neisseria	g_Granulicatella	0.0420979	I
g_Neisseria	g_Porphyromonas	0.00229473	I
g_Neisseria	g_Prevotellaceae__unclassifiedFamily	0.001805	I
g_Neisseria	g_Anaerococcus	-0.043069	I
g_Enhydrobacter	g_Chryseobacterium	0.00552223	I
g_Finegoldia	g_Campylobacter	0.0474773	I
g_Finegoldia	g_Anaerococcus	0.127357	I
g_Finegoldia	g_Lawsonella	0.00274383	I
g_Finegoldia	g_Peptoniphilus	0.356507	I
g_Hoylesella	g_Fusobacterium	0.0387264	I
g_Granulicatella	g_Anaerococcus	-0.0283275	I
g_Fusobacterium	g_Porphyromonas	0.0515476	I
g_Fusobacterium	g_Prevotellaceae__unclassifiedFamily	0.0445514	I
g_Porphyromonas	g_Prevotellaceae__unclassifiedFamily	0.185251	I
g_Prevotellaceae__unclassifiedFamily	g_Anaerococcus	-0.0252052	I
g_Anaerococcus	g_Bergeyella	-0.0387505	I
g_Anaerococcus	g_Lawsonella	0.0699117	I
g_Anaerococcus	g_Peptoniphilus	0.323443	I
g_Lawsonella	g_Peptoniphilus	0.06404	I
g_Acinetobacter	g_Enhydrobacter	0.066503	II
g_Acinetobacter	g_Chryseobacterium	0.118327	II
g_Acinetobacter	g_Achromobacter	0.028144	II
g_Corynebacterium	g_Rothia	-0.0283451	II
g_Corynebacterium	g_Propionibacteriaceae__unclassifiedFamily	0.025102	II
g_Cutibacterium	g_Veillonella	-0.0128768	II
g_Cutibacterium	g_Propionibacteriaceae__unclassifiedFamily	0.148047	II
g_Cutibacterium	g_Lawsonella	0.00695073	II
g_Dolosigranulum	g_Staphylococcus	-0.0665708	II
g_Dolosigranulum	g_Moraxella	0.0728342	II
g_Dolosigranulum	g_Anaerococcus	-0.0136193	II
g_Gemella	g_Haemophilus	0.143993	II
g_Gemella	g_Streptococcus	0.177008	II
g_Gemella	g_Rothia	0.00969557	II
g_Gemella	g_Granulicatella	0.149415	II
g_Gemella	g_Neisseria	0.065977	II
g_Gemella	g_Prevotellaceae__unclassifiedFamily	0.0143794	II
g_Gemella	g_Peptoniphilus	-0.00177642	II
g_Haemophilus	g_Streptococcus	0.0735824	II
g_Haemophilus	g_Neisseria	0.0474471	II
g_Staphylococcus	g_Anaerococcus	0.112657	II
g_Staphylococcus	g_Lawsonella	0.00535374	II
g_Streptococcus	g_Rothia	0.128921	II
g_Streptococcus	g_Veillonella	0.127056	II
g_Streptococcus	g_Anaerococcus	-0.00213896	II
g_Streptococcus	g_Finegoldia	-0.000181402	II
g_Streptococcus	g_Peptoniphilus	-0.0228899	II
g_Rothia	g_Actinomyces	0.008799	II
g_Rothia	g_Veillonella	0.0658825	II
g_Rothia	g_Schaalia	0.0189255	II
g_Rothia	g_Propionibacteriaceae__unclassifiedFamily	-0.00183768	II
g_Actinomyces	g_Veillonella	0.0783739	II
g_Actinomyces	g_Leptotrichia	0.145055	II
g_Enhydrobacter	g_Chryseobacterium	0.0839975	II
g_Enhydrobacter	g_Micrococcus	0.0619984	II
g_Veillonella	g_Granulicatella	0.00870521	II
g_Veillonella	g_Prevotella	0.0277898	II
g_Veillonella	g_Schaalia	0.182331	II
g_Veillonella	g_Leptotrichia	0.0043394	II
g_Veillonella	g_Propionibacteriaceae__unclassifiedFamily	-0.00139299	II
g_Veillonella	g_Lawsonella	-0.046007	II
g_Anaerococcus	g_Finegoldia	0.200303	II
g_Anaerococcus	g_Neisseria	-0.0391244	II
g_Anaerococcus	g_Prevotellaceae__unclassifiedFamily	-0.0316811	II
g_Anaerococcus	g_Peptoniphilus	0.250574	II
g_Anaerococcus	g_Propionibacteriaceae__unclassifiedFamily	0.0166009	II
g_Anaerococcus	g_Lawsonella	0.0505239	II
g_Finegoldia	g_Fusobacterium	-0.00386235	II
g_Finegoldia	g_Pasteurellaceae__unclassifiedFamily	-0.00934115	II
g_Finegoldia	g_Campylobacter	0.0994235	II
g_Finegoldia	g_Peptoniphilus	0.379182	II
g_Finegoldia	g_Propionibacteriaceae__unclassifiedFamily	0.0115653	II
g_Finegoldia	g_Lawsonella	0.0243737	II
g_Fusobacterium	g_Granulicatella	0.0265528	II
g_Fusobacterium	g_Porphyromonas	0.0521889	II
g_Fusobacterium	g_Prevotellaceae__unclassifiedFamily	0.0553475	II
g_Fusobacterium	g_Peptoniphilus	-0.00731085	II
g_Granulicatella	g_Neisseria	0.0835455	II
g_Granulicatella	g_Schaalia	0.0155645	II
g_Granulicatella	g_Prevotellaceae__unclassifiedFamily	0.00531265	II
g_Granulicatella	g_Peptoniphilus	-0.00631068	II
g_Prevotella	g_Schaalia	0.0208673	II
g_Chryseobacterium	g_Micrococcaceae__unclassifiedFamily	0.00286776	II
g_Hoylesella	g_Campylobacter	0.152231	II
g_Pasteurellaceae__unclassifiedFamily	g_Peptoniphilus	-0.0126186	II
g_Porphyromonas	g_Prevotellaceae__unclassifiedFamily	0.0636209	II
g_Prevotellaceae__unclassifiedFamily	g_Peptoniphilus	-0.0192295	II
g_Peptoniphilus	g_Lawsonella	0.0094878	II
g_Corynebacterium	g_Prevotellaceae__unclassifiedFamily	-0.0160362	III
g_Corynebacterium	g_Anaerococcus	0.0166342	III
g_Cutibacterium	g_Lawsonella	0.0294161	III
g_Dolosigranulum	g_Moraxella	0.0580881	III
g_Prevotellaceae__unclassifiedFamily	g_Neisseria	0.00351772	III
g_Prevotellaceae__unclassifiedFamily	g_Porphyromonas	0.0699859	III
g_Streptococcus	g_Haemophilus	0.0180066	III
g_Streptococcus	g_Rothia	0.0236815	III
g_Streptococcus	g_Veillonella	0.119577	III
g_Streptococcus	g_Gemella	0.160206	III
g_Streptococcus	g_Peptoniphilus	-0.0323502	III
g_Streptococcus	g_Escherichia-Shigella	-0.00566003	III
g_Streptococcus	g_Achromobacter	-0.07462	III
g_Neisseria	g_Haemophilus	0.0521165	III
g_Neisseria	g_Peptoniphilus	-0.00415502	III
g_Neisseria	g_Anaerococcus	-0.0199609	III
g_Neisseria	g_Granulicatella	0.11418	III
g_Neisseria	g_Porphyromonas	0.00427627	III
g_Haemophilus	g_Peptoniphilus	-0.00903142	III
g_Haemophilus	g_Anaerococcus	-0.0168235	III
g_Acinetobacter	g_Enhydrobacter	0.0438358	III
g_Acinetobacter	g_Chryseobacterium	0.13718	III
g_Acinetobacter	g_Achromobacter	0.00294823	III
g_Brachybacterium	g_Micrococcaceae__unclassifiedFamily	0.0536876	III
g_Veillonella	g_Schaalia	0.0152252	III
g_Veillonella	g_Prevotella	0.127088	III
g_Enhydrobacter	g_Micrococcus	0.0125808	III
g_Enhydrobacter	g_Chryseobacterium	0.00304226	III
g_Gemella	g_Granulicatella	0.0756676	III
g_Gemella	g_Pasteurellaceae__unclassifiedFamily	0.00158152	III
g_Finegoldia	g_Peptoniphilus	0.26759	III
g_Finegoldia	g_Anaerococcus	0.0836722	III
g_Peptoniphilus	g_Anaerococcus	0.341469	III
g_Peptoniphilus	g_Lawsonella	0.0781466	III
g_Schaalia	g_Actinomyces	0.0341276	III
g_Segatella	g_Prevotella	0.010286	III
g_Actinomyces	g_Leptotrichia	0.0140597	III
g_Fusobacterium	g_Porphyromonas	0.095112	III
g_Granulicatella	g_Pasteurellaceae__unclassifiedFamily	0.0287951	III
g_Granulicatella	g_Porphyromonas	0.00655621	III
g_Campylobacter	g_Hoylesella	0.00035008	III
g_Anaerococcus	g_Peptoniphilus	0.32441	IV
g_Acinetobacter	g_Micrococcus	0.00359405	V
g_Acinetobacter	g_Chryseobacterium	0.117963	V
g_Acinetobacter	g_Kocuria	0.0527181	V
g_Acinetobacter	g_Achromobacter	0.0032042	V
g_Corynebacterium	g_Staphylococcus	0.267156	V
g_Corynebacterium	g_Anaerococcus	0.0370293	V
g_Corynebacterium	g_Lawsonella	0.0228982	V
g_Corynebacterium	g_Peptoniphilus	0.0169556	V
g_Cutibacterium	g_Veillonella	-0.0120032	V
g_Cutibacterium	g_Propionibacteriaceae__unclassifiedFamily	0.0890788	V
g_Gemella	g_Haemophilus	0.0458267	V
g_Gemella	g_Rothia	0.0114117	V
g_Gemella	g_Schaalia	0.00860729	V
g_Gemella	g_Streptococcus	0.0933335	V
g_Gemella	g_Fusobacterium	0.0146669	V
g_Gemella	g_Neisseria	0.0217734	V
g_Gemella	g_Granulicatella	0.194696	V
g_Haemophilus	g_Rothia	0.000857579	V
g_Haemophilus	g_Streptococcus	0.112972	V
g_Haemophilus	g_Neisseria	0.0522693	V
g_Rothia	g_Schaalia	0.0932168	V
g_Rothia	g_Streptococcus	0.113987	V
g_Rothia	g_Actinomyces	0.00910557	V
g_Rothia	g_Granulicatella	0.044219	V
g_Schaalia	g_Veillonella	0.108763	V
g_Schaalia	g_Actinomyces	0.0592811	V
g_Schaalia	g_Lachnoanaerobaculum	0.0205879	V
g_Staphylococcus	g_Anaerococcus	0.0233539	V
g_Streptococcus	g_Veillonella	0.0627432	V
g_Streptococcus	g_Granulicatella	0.0100206	V
g_Streptococcus	g_Anaerococcus	-0.0233157	V
g_Veillonella	g_Prevotella	0.0606944	V
g_Actinomyces	g_Leptotrichia	0.0137798	V
g_Actinomyces	g_Faecalibacterium	-0.00176578	V
g_Porphyromonas	g_Fusobacterium	0.0825876	V
g_Enhydrobacter	g_Micrococcus	0.181146	V
g_Enhydrobacter	g_Chryseobacterium	0.0181831	V
g_Enhydrobacter	g_Kocuria	0.00291659	V
g_Neisseria	g_Granulicatella	0.00511033	V
g_Finegoldia	g_Campylobacter	0.0411482	V
g_Finegoldia	g_Anaerococcus	0.209051	V
g_Finegoldia	g_Dialister	0.00265103	V
g_Finegoldia	g_Peptoniphilus	0.341668	V
g_Finegoldia	g_Negativicoccus	0.0743746	V
g_Lancefieldella	g_Selenomonas	0.0834865	V
g_Lancefieldella	g_Oribacterium	0.0449	V
g_Micrococcus	g_Kocuria	0.0143518	V
g_Micrococcus	g_Pseudoleptotrichia	-0.00039262	V
g_Bacteroides	g_Escherichia-Shigella	0.152976	V
g_Bacteroides	g_Lachnospiraceae__unclassifiedFamily	0.121561	V
g_Bacteroides	g_Ruminococcaceae__unclassifiedFamily	0.210539	V
g_Campylobacter	g_Hoylesella	0.200978	V
g_Campylobacter	g_Prevotella	0.012897	V
g_Campylobacter	g_Dialister	0.0189468	V
g_Campylobacter	g_Negativicoccus	0.106473	V
g_Hoylesella	g_Dialister	0.0864252	V
g_Hoylesella	g_Negativicoccus	0.0122668	V
g_Lachnoanaerobaculum	g_Leptotrichia	0.0210214	V
g_Lachnoanaerobaculum	g_Selenomonas	0.0341594	V
g_Lachnoanaerobaculum	g_Oribacterium	0.0423413	V
g_Lachnoanaerobaculum	g_Pseudoleptotrichia	0.0139196	V
g_Lachnospiraceae__unclassifiedFamily	g_Prevotellaceae__unclassifiedFamily	0.0165399	V
g_Lachnospiraceae__unclassifiedFamily	g_Ruminococcaceae__unclassifiedFamily	0.278445	V
g_Lachnospiraceae__unclassifiedFamily	g_Segatella	0.0480131	V
g_Lachnospiraceae__unclassifiedFamily	g_Faecalibacterium	0.196528	V
g_Prevotellaceae__unclassifiedFamily	g_Segatella	0.0739656	V
g_Prevotellaceae__unclassifiedFamily	g_Faecalibacterium	0.0415395	V
g_Ruminococcaceae__unclassifiedFamily	g_Faecalibacterium	0.116258	V
g_Segatella	g_Selenomonas	0.0507348	V
g_Segatella	g_Faecalibacterium	0.0189834	V
g_Anaerococcus	g_Peptoniphilus	0.339713	V
g_Kocuria	g_Brachybacterium	0.00776058	V
g_Lactobacillus	g_Faecalibacterium	0.00972774	V
g_Leptotrichia	g_Selenomonas	0.00675872	V
g_Selenomonas	g_Oribacterium	0.00760867	V
g_Lawsonella	g_Peptoniphilus	0.0710379	V
g_Dialister	g_Negativicoccus	0.0336117	V
g_Peptoniphilus	g_Propionibacteriaceae__unclassifiedFamily	0.0655893	V
g_Peptoniphilus	g_Negativicoccus	0.00236185	V
g_Acinetobacter	g_Micrococcus	0.0740119	VI
g_Acinetobacter	g_Staphylococcus	0.0211955	VI
g_Acinetobacter	g_Enhydrobacter	0.139057	VI
g_Acinetobacter	g_Chryseobacterium	0.0996569	VI
g_Acinetobacter	g_Escherichia-Shigella	0.0934709	VI
g_Acinetobacter	g_Fusobacterium	-0.0039067	VI
g_Acinetobacter	g_Enterobacteriaceae__unclassifiedFamily	0.0278823	VI
g_Bergeyella	g_Gemella	0.0489195	VI
g_Bergeyella	g_Granulicatella	0.00249538	VI
g_Bergeyella	g_Neisseria	0.00480654	VI
g_Corynebacterium	g_Dolosigranulum	0.168971	VI
g_Corynebacterium	g_Staphylococcus	0.322114	VI
g_Corynebacterium	g_Veillonella	-0.0160522	VI
g_Corynebacterium	g_Prevotella	-0.0938136	VI
g_Corynebacterium	g_Neisseriaceae__unclassifiedFamily	0.0108115	VI
g_Corynebacterium	g_Lachnoanaerobaculum	-0.00928325	VI
g_Corynebacterium	g_Oribacterium	-0.0403137	VI
g_Cutibacterium	g_Micrococcus	0.0268869	VI
g_Cutibacterium	g_Staphylococcus	0.0466128	VI
g_Cutibacterium	g_Enhydrobacter	0.0478379	VI
g_Cutibacterium	g_Anaerococcus	0.0191342	VI
g_Cutibacterium	g_Lawsonella	0.0542937	VI
g_Dolosigranulum	g_Moraxella	0.173571	VI
g_Gemella	g_Haemophilus	0.0015964	VI
g_Gemella	g_Granulicatella	0.0505018	VI
g_Gemella	g_Porphyromonas	0.0896369	VI
g_Haemophilus	g_Neisseria	0.228402	VI
g_Micrococcus	g_Staphylococcus	0.015662	VI
g_Micrococcus	g_Enhydrobacter	0.363262	VI
g_Micrococcus	g_Chryseobacterium	0.065491	VI
g_Micrococcus	g_Campylobacter	-0.0150469	VI
g_Micrococcus	g_Lawsonella	0.00617421	VI
g_Micrococcus	g_Enterobacteriaceae__unclassifiedFamily	0.0522601	VI
g_Micrococcus	g_Peptostreptococcus	-0.010924	VI
g_Rothia	g_Granulicatella	0.0286876	VI
g_Rothia	g_Actinomyces	0.0252901	VI
g_Rothia	g_Schaalia	0.103537	VI
g_Staphylococcus	g_Enhydrobacter	0.0569692	VI
g_Staphylococcus	g_Anaerococcus	0.110654	VI
g_Staphylococcus	g_Lachnoanaerobaculum	-0.054154	VI
g_Staphylococcus	g_Lawsonella	0.0163872	VI
g_Staphylococcus	g_Oribacterium	-0.0129365	VI
g_Streptococcus	g_Campylobacter	-0.0121273	VI
g_Streptococcus	g_Fusobacterium	-0.0170406	VI
g_Veillonella	g_Prevotella	0.177759	VI
g_Veillonella	g_Schaalia	0.0429354	VI
g_Veillonella	g_Leptotrichia	0.00743028	VI
g_Veillonella	g_Megasphaera	0.0796002	VI
g_Bifidobacterium	g_Lactobacillus	0.0197896	VI
g_Bifidobacterium	g_Porphyromonas	-0.000776887	VI
g_Enhydrobacter	g_Chryseobacterium	0.0530706	VI
g_Enhydrobacter	g_Neisseriaceae__unclassifiedFamily	0.00825483	VI
g_Enhydrobacter	g_Anaerococcus	0.0027315	VI
g_Enhydrobacter	g_Pseudoleptotrichia	-0.0122304	VI
g_Enhydrobacter	g_Lawsonella	0.0163424	VI
g_Enhydrobacter	g_Prevotellaceae__unclassifiedFamily	-0.0145707	VI
g_Enhydrobacter	g_Catonella	-0.0479713	VI
g_Enhydrobacter	g_Solobacterium	-0.0294222	VI
g_Prevotella	g_Moraxella	-0.030507	VI
g_Prevotella	g_Lancefieldella	0.0491991	VI
g_Prevotella	g_Neisseriaceae__unclassifiedFamily	-0.0381829	VI
g_Prevotella	g_Campylobacter	0.0670535	VI
g_Prevotella	g_Segatella	0.256639	VI
g_Prevotella	g_Megasphaera	0.0594824	VI
g_Selenomonas	g_Stomatobaculum	0.0189995	VI
g_Selenomonas	g_Segatella	0.11051	VI
g_Selenomonas	g_Leptotrichia	0.10306	VI
g_Selenomonas	g_Megasphaera	0.0322317	VI
g_Selenomonas	g_Oribacterium	0.0101826	VI
g_Selenomonas	g_Selenomonadaceae__unclassifiedFamily	0.0397995	VI
g_Granulicatella	g_Neisseria	0.0312295	VI
g_Johnsonella	g_Moraxella	0.0161308	VI
g_Moraxella	g_Stomatobaculum	-0.00077481	VI
g_Pasteurellaceae__unclassifiedFamily	g_Lancefieldella	-0.0120509	VI
g_Pasteurellaceae__unclassifiedFamily	g_Megasphaera	-0.00194346	VI
g_Pasteurellaceae__unclassifiedFamily	g_Solobacterium	-0.0154153	VI
g_Porphyromonas	g_Hoylesella	0.059131	VI
g_Porphyromonas	g_Fusobacterium	0.144016	VI
g_Porphyromonas	g_Prevotellaceae__unclassifiedFamily	0.0802139	VI
g_Actinomyces	g_Schaalia	0.195621	VI
g_Actinomyces	g_Leptotrichia	0.00469924	VI
g_Lancefieldella	g_Schaalia	0.0945472	VI
g_Lancefieldella	g_Stomatobaculum	0.0117368	VI
g_Lancefieldella	g_Segatella	0.00412887	VI
g_Lancefieldella	g_Megasphaera	0.0307993	VI
g_Lancefieldella	g_Solobacterium	0.0560023	VI
g_Schaalia	g_Stomatobaculum	0.0981096	VI
g_Schaalia	g_Lachnoanaerobaculum	0.00183742	VI
g_Finegoldia	g_Peptoniphilus	0.18322	VI
g_Finegoldia	g_Anaerococcus	0.335752	VI
g_Finegoldia	g_Pseudoleptotrichia	-0.0056207	VI
g_Finegoldia	g_Lawsonella	0.00346432	VI
g_Chryseobacterium	g_Enterobacteriaceae__unclassifiedFamily	0.0015213	VI
g_Neisseriaceae__unclassifiedFamily	g_Segatella	-0.0202583	VI
g_Neisseriaceae__unclassifiedFamily	g_Oribacterium	-0.00148187	VI
g_Peptoniphilus	g_Anaerococcus	0.239309	VI
g_Peptoniphilus	g_Lawsonella	0.050379	VI
g_Hoylesella	g_Fusobacterium	0.0726097	VI
g_Hoylesella	g_Prevotellaceae__unclassifiedFamily	0.00253358	VI
g_Stomatobaculum	g_Lachnoanaerobaculum	0.213332	VI
g_Stomatobaculum	g_Lachnospiraceae__unclassifiedFamily	0.0449458	VI
g_Stomatobaculum	g_Megasphaera	0.00531679	VI
g_Stomatobaculum	g_Oribacterium	0.238118	VI
g_Anaerococcus	g_Lawsonella	0.0834057	VI
g_Anaerococcus	g_Prevotellaceae__unclassifiedFamily	-0.00940924	VI
g_Campylobacter	g_Segatella	0.0461428	VI
g_Campylobacter	g_Catonella	0.0365961	VI
g_Lachnoanaerobaculum	g_Leptotrichia	0.0558014	VI
g_Lachnoanaerobaculum	g_Oribacterium	0.0322401	VI
g_Fusobacterium	g_Treponema	0.000112158	VI
g_Fusobacterium	g_Parvimonas	0.127143	VI
g_Pseudoleptotrichia	g_Lawsonella	-0.000794554	VI
g_Treponema	g_Parvimonas	0.14106	VI
g_Treponema	g_Tannerella	0.0217863	VI
g_Segatella	g_Alloprevotella	0.0250999	VI
g_Segatella	g_Megasphaera	0.0732267	VI
g_Alloprevotella	g_Megasphaera	0.00247366	VI
g_Catonella	g_Peptostreptococcus	0.00335369	VI
g_Eikenella	g_Megasphaera	-0.00156102	VI
g_Leptotrichia	g_Megasphaera	0.0361648	VI
g_Oribacterium	g_Solobacterium	0.150712	VI
g_Peptostreptococcus	g_Solobacterium	0.033235	VI

## Sheet: S8
Table S8. Odds ratios with 95% confidence intervals comparing the likelihood of bacterial and viral infections versus controls across clusters, derived from multinomial logistic regression with FDR-adjusted p-values.
NPCST	Contrast	Odds Ratio	Lower Bound	Higher Bound	FDR-Adjusted p-value
I	Bacterial Infection - Control	0.936495	0.881141	0.995326	0.0696
I	Viral Infection - Control	0.978053	0.91462	1.04589	0.5166
II	Bacterial Infection - Control	0.927893	0.858032	1.00344	0.1219
II	Viral Infection - Control	0.996602	0.947857	1.04785	0.8942
III	Bacterial Infection - Control	0.958518	0.899956	1.02089	0.1878
III	Viral Infection - Control	1.04085	1.00195	1.08126	0.0787
IV	Bacterial Infection - Control	1.0173	0.993573	1.0416	0.1543
IV	Viral Infection - Control	1.05254	1.00863	1.09837	0.037
V	Bacterial Infection - Control	0.977902	0.873441	1.09486	0.6982
V	Viral Infection - Control	1.04575	1.00309	1.09023	0.0706
VI	Bacterial Infection - Control	1.20685	1.0954	1.32963	0.0001
VI	Viral Infection - Control	0.895486	0.856079	0.936707	0

[truncated: 4 more sheets: S10, S11, S12, S13]
